# Supplementary material for: Microbial Adhesion and Biofilm Formation on Bioactive Surfaces of Ti-35Nb-7Zr-5Ta Alloy Created by Anodization
Source: MDPI journal article supplement (doi:10.3390/microorganisms9102154), 2021-10-15
Supplement: s1 [file s1]

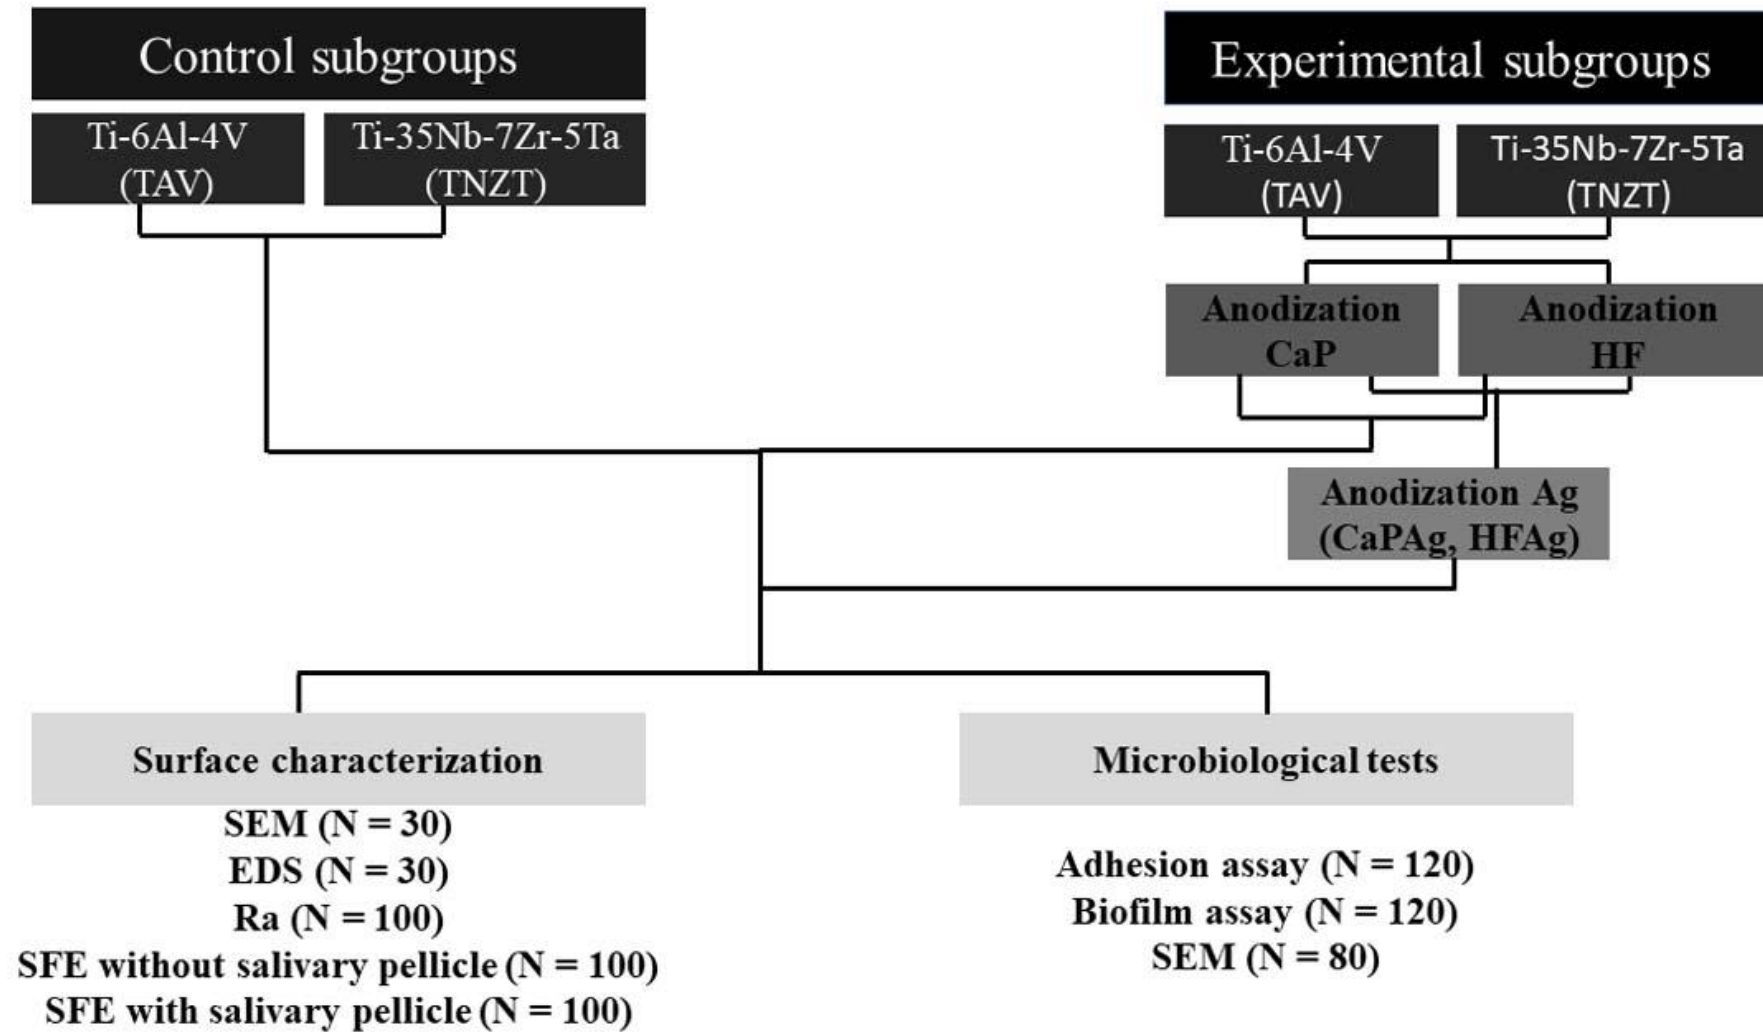

**Figure S1 - Schematic chart of the experimental design.**

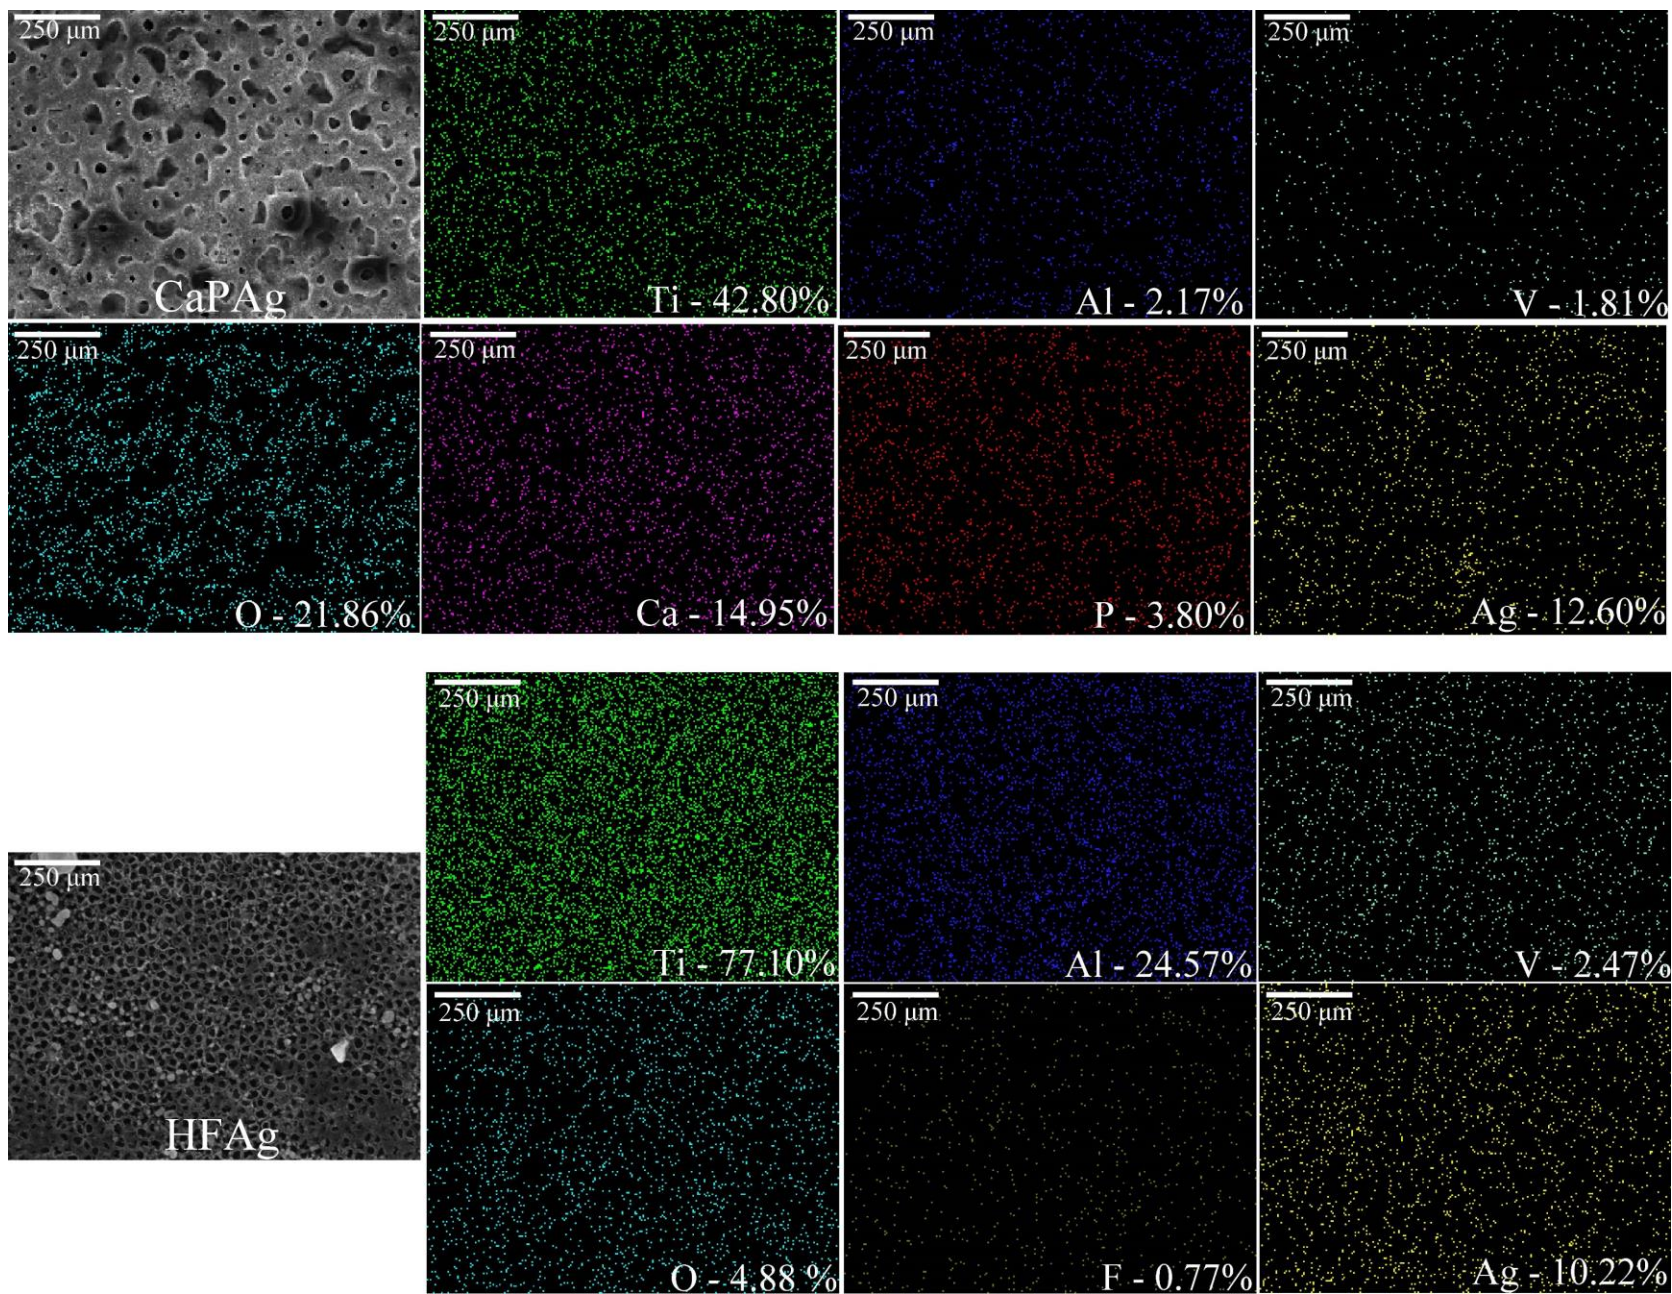

**Figure S2 - Chemical mapping by EDS with elements concentration (wt%) for CaPAg TAV and HFPAg TAV.**

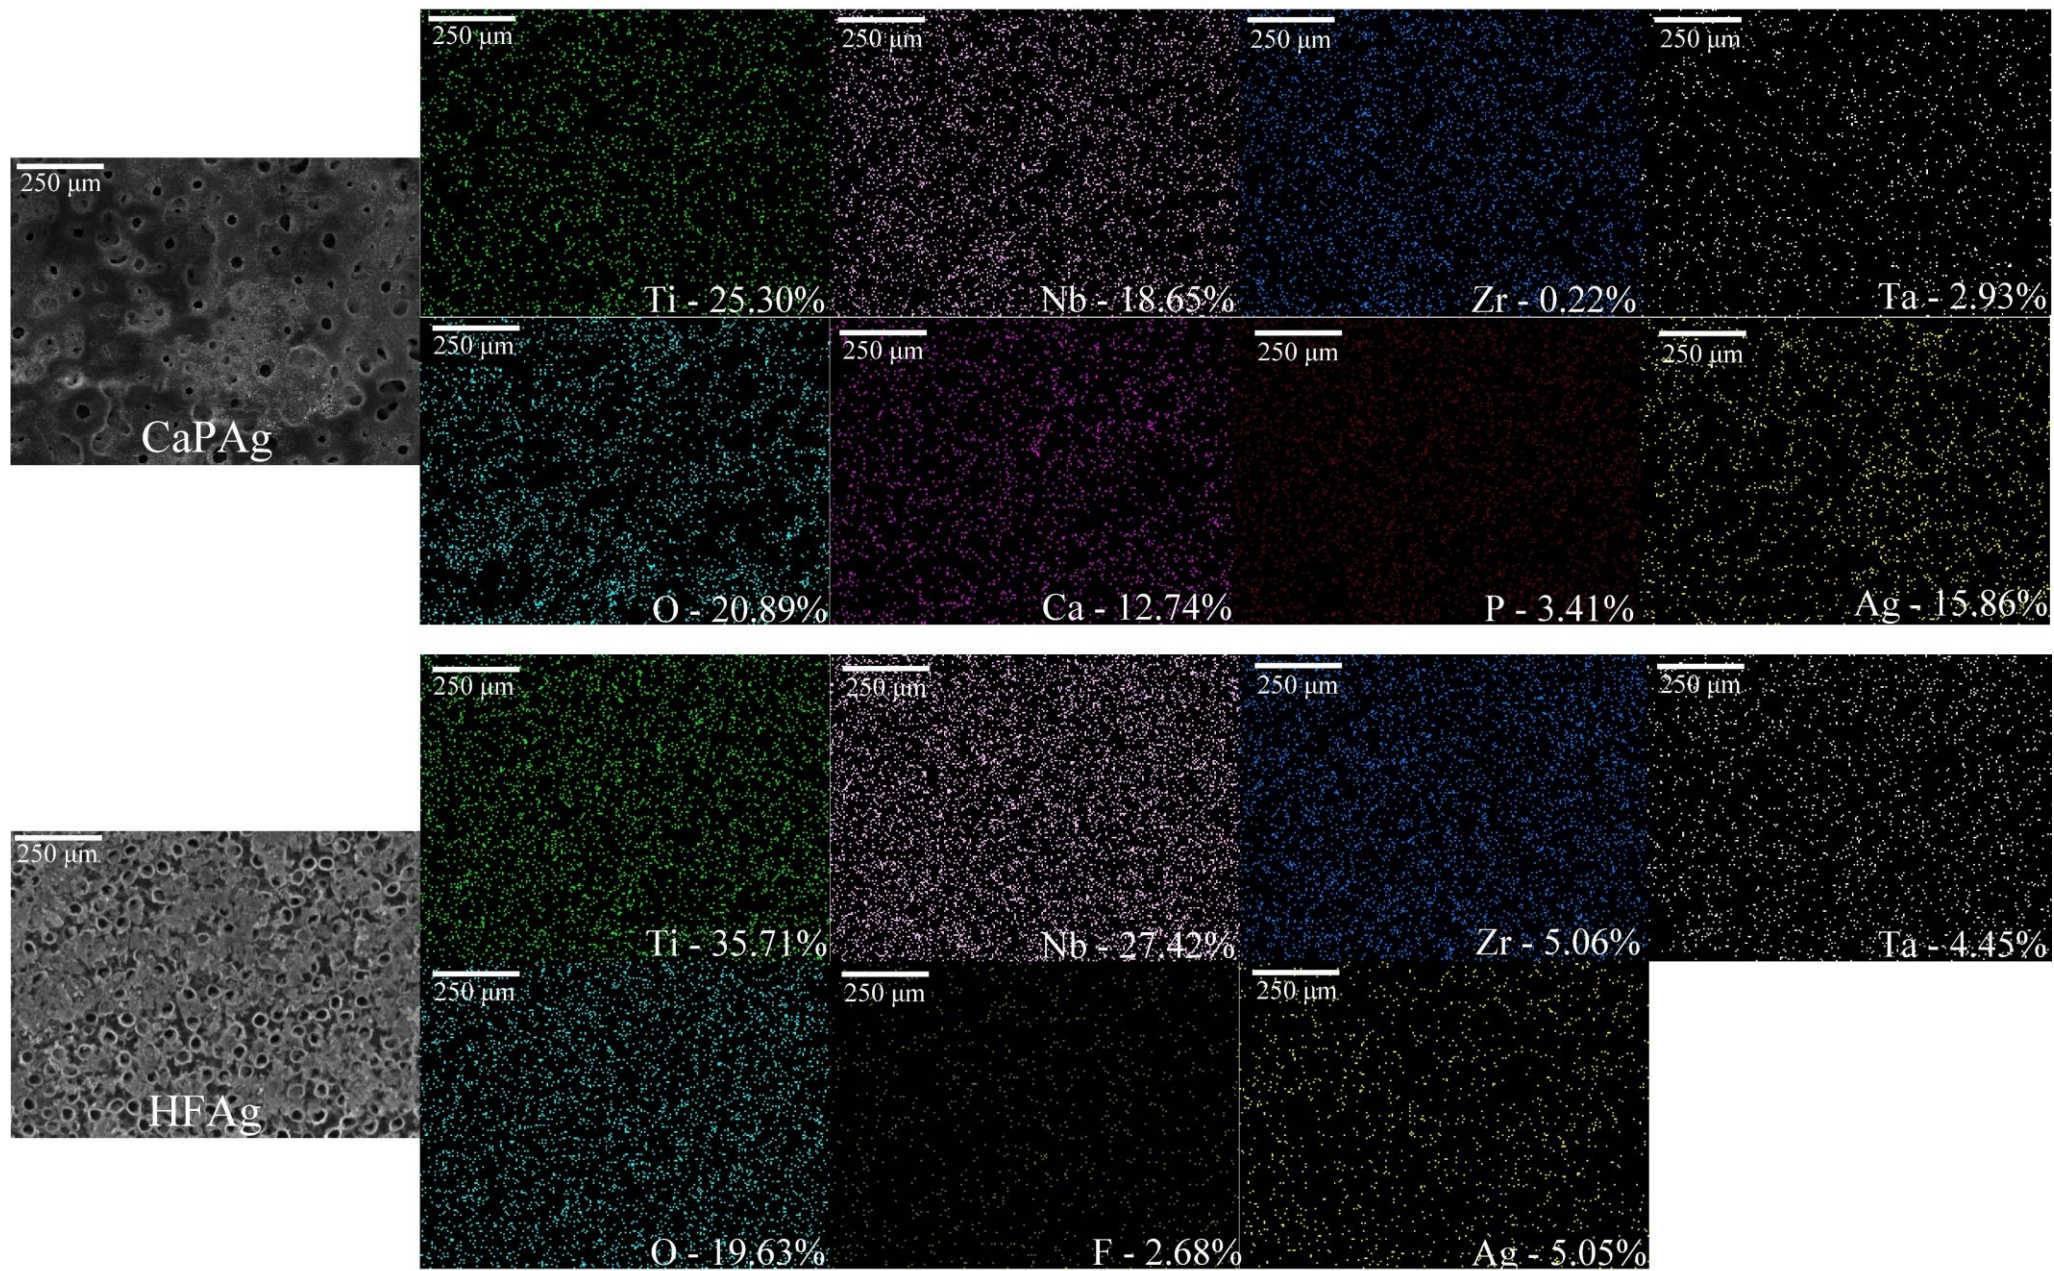

**Figure S3 - Chemical mapping by EDS with elements concentration (wt%) for for CaPAg TNZT and HFAg TNZT.**

**Table S1. Statistical analysis of the bacterial adhesion data.**

|                             |                      |         |                 |                     |          |
|-----------------------------|----------------------|---------|-----------------|---------------------|----------|
| Table Analyzed              | Grouped:             |         |                 |                     |          |
| Two-way ANOVA               | Ordinary             |         |                 |                     |          |
| Alpha                       | 0,05                 |         |                 |                     |          |
| Source of Variation         | % of total variation | P value | P value summary | Significant?        |          |
| Interaction                 | 8,257                | 0,0011  | **              | Yes                 |          |
| Species                     | 53,51                | <0,0001 | ****            | Yes                 |          |
| Surface                     | 11,71                | <0,0001 | ****            | Yes                 |          |
| ANOVA table                 | SS (Type III)        | DF      | MS              | F (DFn, DFd)        | P value  |
| Interaction                 | 11,03                | 27      | 0,4086          | F (27, 194) = 2,206 | P=0,0011 |
| Species                     | 71,51                | 3       | 23,84           | F (3, 194) = 128,7  | P<0,0001 |
| Surface                     | 15,64                | 9       | 1,738           | F (9, 194) = 9,385  | P<0,0001 |
| Residual                    | 35,93                | 194     | 0,1852          |                     |          |
| Data summary                |                      |         |                 |                     |          |
| Number of columns (Surface) | 10                   |         |                 |                     |          |
| Number of rows (Species)    | 4                    |         |                 |                     |          |
| Number of values            | 234                  |         |                 |                     |          |

### Multiple comparisons

|                                                                               |                           |                           |                  |             |                   |
|-------------------------------------------------------------------------------|---------------------------|---------------------------|------------------|-------------|-------------------|
| Compare cell means regardless of rows and columns                             |                           |                           |                  |             |                   |
| Number of families                                                            | 1                         |                           |                  |             |                   |
| Number of comparisons per family                                              | 780                       |                           |                  |             |                   |
| Alpha                                                                         | 0,05                      |                           |                  |             |                   |
| Tukey's multiple comparisons test                                             | Predicted (LS) mean diff. | 95,00% CI of diff.        | Below threshold? | Summary     | Adjusted P Value  |
| <i>S. gordonii</i> :TAV - Control vs. <i>S. gordonii</i> :TAV - CaP           | -0,5483                   | -1,530 to 0,4334          | No               | ns          | 0,9734            |
| <i>S. gordonii</i> :TAV - Control vs. <i>S. gordonii</i> :TAV - CaPAg         | -0,1867                   | -1,168 to 0,7951          | No               | ns          | >0,9999           |
| <i>S. gordonii</i> :TAV - Control vs. <i>S. gordonii</i> :TAV - HF            | -0,1660                   | -1,196 to 0,8637          | No               | ns          | >0,9999           |
| <i>S. gordonii</i> :TAV - Control vs. <i>S. gordonii</i> :TAV - HFAG          | 0,1333                    | -0,8484 to 1,115          | No               | ns          | >0,9999           |
| <i>S. gordonii</i> :TAV - Control vs. <i>S. gordonii</i> :TNZT - Control      | -0,1217                   | -1,103 to 0,8601          | No               | ns          | >0,9999           |
| <i>S. gordonii</i> :TAV - Control vs. <i>S. gordonii</i> :TNZT - CaP          | -0,6617                   | -1,643 to 0,3201          | No               | ns          | 0,7857            |
| <i>S. gordonii</i> :TAV - Control vs. <i>S. gordonii</i> :TNZT - CaPAg        | -0,2317                   | -1,213 to 0,7501          | No               | ns          | >0,9999           |
| <i>S. gordonii</i> :TAV - Control vs. <i>S. gordonii</i> :TNZT - HF           | 0,1383                    | -0,8434 to 1,120          | No               | ns          | >0,9999           |
| <i>S. gordonii</i> :TAV - Control vs. <i>S. gordonii</i> :TNZT - HFAG         | 0,04333                   | -0,9384 to 1,025          | No               | ns          | >0,9999           |
| <i>S. gordonii</i> :TAV - Control vs. <i>S. sanguinis</i> :TAV - Control      | 0,3517                    | -0,6301 to 1,333          | No               | ns          | >0,9999           |
| <i>S. gordonii</i> :TAV - Control vs. <i>S. sanguinis</i> :TAV - CaP          | -0,04000                  | -1,022 to 0,9417          | No               | ns          | >0,9999           |
| <i>S. gordonii</i> :TAV - Control vs. <i>S. sanguinis</i> :TAV - CaPAg        | 0,1367                    | -0,8451 to 1,118          | No               | ns          | >0,9999           |
| <i>S. gordonii</i> :TAV - Control vs. <i>S. sanguinis</i> :TAV - HF           | 0,005000                  | -0,9767 to 0,9867         | No               | ns          | >0,9999           |
| <i>S. gordonii</i> :TAV - Control vs. <i>S. sanguinis</i> :TAV - HFAG         | 0,3000                    | -0,6817 to 1,282          | No               | ns          | >0,9999           |
| <i>S. gordonii</i> :TAV - Control vs. <i>S. sanguinis</i> :TNZT - Control     | -0,2350                   | -1,217 to 0,7467          | No               | ns          | >0,9999           |
| <i>S. gordonii</i> :TAV - Control vs. <i>S. sanguinis</i> :TNZT - CaP         | -0,4117                   | -1,393 to 0,5701          | No               | ns          | 0,9998            |
| <i>S. gordonii</i> :TAV - Control vs. <i>S. sanguinis</i> :TNZT - CaPAg       | 0,1467                    | -0,8351 to 1,128          | No               | ns          | >0,9999           |
| <i>S. gordonii</i> :TAV - Control vs. <i>S. sanguinis</i> :TNZT - HF          | 0,1367                    | -0,8451 to 1,118          | No               | ns          | >0,9999           |
| <i>S. gordonii</i> :TAV - Control vs. <i>S. sanguinis</i> :TNZT - HFAG        | 0,6900                    | -0,2917 to 1,672          | No               | ns          | 0,7035            |
| <i>S. gordonii</i> :TAV - Control vs. <i>A. naeslundii</i> :TAV - Control     | -0,3350                   | -1,317 to 0,6467          | No               | ns          | >0,9999           |
| <i>S. gordonii</i> :TAV - Control vs. <i>A. naeslundii</i> :TAV - CaP         | -0,7300                   | -1,712 to 0,2517          | No               | ns          | 0,5747            |
| <i>S. gordonii</i> :TAV - Control vs. <i>A. naeslundii</i> :TAV - CaPAg       | -0,8767                   | -1,858 to 0,1051          | No               | ns          | 0,1732            |
| <i>S. gordonii</i> :TAV - Control vs. <i>A. naeslundii</i> :TAV - HF          | -0,1660                   | -1,196 to 0,8637          | No               | ns          | >0,9999           |
| <i>S. gordonii</i> :TAV - Control vs. <i>A. naeslundii</i> :TAV - HFAG        | 0,04333                   | -0,9384 to 1,025          | No               | ns          | >0,9999           |
| <i>S. gordonii</i> :TAV - Control vs. <i>A. naeslundii</i> :TNZT - Control    | -0,8617                   | -1,843 to 0,1201          | No               | ns          | 0,2019            |
| <b><i>S. gordonii</i>:TAV - Control vs. <i>A. naeslundii</i>:TNZT - CaP</b>   | <b>-1,032</b>             | <b>-2,013 to -0,04992</b> | <b>Yes</b>       | <b>*</b>    | <b>0,0253</b>     |
| <i>S. gordonii</i> :TAV - Control vs. <i>A. naeslundii</i> :TNZT - CaPAg      | -0,7267                   | -1,708 to 0,2551          | No               | ns          | 0,5857            |
| <i>S. gordonii</i> :TAV - Control vs. <i>A. naeslundii</i> :TNZT - HF         | -0,2167                   | -1,198 to 0,7651          | No               | ns          | >0,9999           |
| <i>S. gordonii</i> :TAV - Control vs. <i>A. naeslundii</i> :TNZT - HFAG       | -0,5560                   | -1,586 to 0,4737          | No               | ns          | 0,9836            |
| <i>S. gordonii</i> :TAV - Control vs. <i>P. gingivalis</i> :TAV - Control     | -0,7067                   | -1,688 to 0,2751          | No               | ns          | 0,6510            |
| <b><i>S. gordonii</i>:TAV - Control vs. <i>P. gingivalis</i>:TAV - CaP</b>    | <b>-1,345</b>             | <b>-2,327 to -0,3633</b>  | <b>Yes</b>       | <b>***</b>  | <b>0,0001</b>     |
| <b><i>S. gordonii</i>:TAV - Control vs. <i>P. gingivalis</i>:TAV - CaPAg</b>  | <b>-1,742</b>             | <b>-2,723 to -0,7599</b>  | <b>Yes</b>       | <b>****</b> | <b>&lt;0,0001</b> |
| <b><i>S. gordonii</i>:TAV - Control vs. <i>P. gingivalis</i>:TAV - HF</b>     | <b>-1,077</b>             | <b>-2,058 to -0,09492</b> | <b>Yes</b>       | <b>*</b>    | <b>0,0131</b>     |
| <b><i>S. gordonii</i>:TAV - Control vs. <i>P. gingivalis</i>:TAV - HFAG</b>   | <b>-1,062</b>             | <b>-2,043 to -0,07992</b> | <b>Yes</b>       | <b>*</b>    | <b>0,0164</b>     |
| <i>S. gordonii</i> :TAV - Control vs. <i>P. gingivalis</i> :TNZT - Control    | -0,8160                   | -1,846 to 0,2137          | No               | ns          | 0,4191            |
| <b><i>S. gordonii</i>:TAV - Control vs. <i>P. gingivalis</i>:TNZT - CaP</b>   | <b>-2,015</b>             | <b>-3,113 to -0,9174</b>  | <b>Yes</b>       | <b>****</b> | <b>&lt;0,0001</b> |
| <b><i>S. gordonii</i>:TAV - Control vs. <i>P. gingivalis</i>:TNZT - CaPAg</b> | <b>-1,998</b>             | <b>-2,980 to -1,017</b>   | <b>Yes</b>       | <b>****</b> | <b>&lt;0,0001</b> |
| <b><i>S. gordonii</i>:TAV - Control vs. <i>P. gingivalis</i>:TNZT - HF</b>    | <b>-1,253</b>             | <b>-2,235 to -0,2716</b>  | <b>Yes</b>       | <b>***</b>  | <b>0,0007</b>     |
| <b><i>S. gordonii</i>:TAV - Control vs. <i>P. gingivalis</i>:TNZT - HFAG</b>  | <b>-1,693</b>             | <b>-2,675 to -0,7116</b>  | <b>Yes</b>       | <b>****</b> | <b>&lt;0,0001</b> |
| <i>S. gordonii</i> :TAV - CaP vs. <i>S. gordonii</i> :TAV - CaPAg             | 0,3617                    | -0,6201 to 1,343          | No               | ns          | >0,9999           |
| <i>S. gordonii</i> :TAV - CaP vs. <i>S. gordonii</i> :TAV - HF                | 0,3823                    | -0,6473 to 1,412          | No               | ns          | >0,9999           |

|                                                                             |               |                           |            |             |                   |
|-----------------------------------------------------------------------------|---------------|---------------------------|------------|-------------|-------------------|
| <i>S. gordonii</i> :TAV - CaP vs. <i>S. gordonii</i> :TAV - HFAg            | 0,6817        | -0,3001 to 1,663          | No         | ns          | 0,7288            |
| <i>S. gordonii</i> :TAV - CaP vs. <i>S. gordonii</i> :TNZT - Control        | 0,4267        | -0,5551 to 1,408          | No         | ns          | 0,9997            |
| <i>S. gordonii</i> :TAV - CaP vs. <i>S. gordonii</i> :TNZT - CaP            | -0,1133       | -1,095 to 0,8684          | No         | ns          | >0,9999           |
| <i>S. gordonii</i> :TAV - CaP vs. <i>S. gordonii</i> :TNZT - CaPAg          | 0,3167        | -0,6651 to 1,298          | No         | ns          | >0,9999           |
| <i>S. gordonii</i> :TAV - CaP vs. <i>S. gordonii</i> :TNZT - HF             | 0,6867        | -0,2951 to 1,668          | No         | ns          | 0,7137            |
| <i>S. gordonii</i> :TAV - CaP vs. <i>S. gordonii</i> :TNZT - HFAg           | 0,5917        | -0,3901 to 1,573          | No         | ns          | 0,9297            |
| <i>S. gordonii</i> :TAV - CaP vs. <i>S. sanguinis</i> :TAV - Control        | 0,9000        | -0,08174 to 1,882         | No         | ns          | 0,1347            |
| <i>S. gordonii</i> :TAV - CaP vs. <i>S. sanguinis</i> :TAV - CaP            | 0,5083        | -0,4734 to 1,490          | No         | ns          | 0,9915            |
| <i>S. gordonii</i> :TAV - CaP vs. <i>S. sanguinis</i> :TAV - CaPAg          | 0,6850        | -0,2967 to 1,667          | No         | ns          | 0,7188            |
| <i>S. gordonii</i> :TAV - CaP vs. <i>S. sanguinis</i> :TAV - HF             | 0,5533        | -0,4284 to 1,535          | No         | ns          | 0,9698            |
| <i>S. gordonii</i> :TAV - CaP vs. <i>S. sanguinis</i> :TAV - HFAg           | 0,8483        | -0,1334 to 1,830          | No         | ns          | 0,2301            |
| <i>S. gordonii</i> :TAV - CaP vs. <i>S. sanguinis</i> :TNZT - Control       | 0,3133        | -0,6684 to 1,295          | No         | ns          | >0,9999           |
| <i>S. gordonii</i> :TAV - CaP vs. <i>S. sanguinis</i> :TNZT - CaP           | 0,1367        | -0,8451 to 1,118          | No         | ns          | >0,9999           |
| <i>S. gordonii</i> :TAV - CaP vs. <i>S. sanguinis</i> :TNZT - CaPAg         | 0,6950        | -0,2867 to 1,677          | No         | ns          | 0,6880            |
| <i>S. gordonii</i> :TAV - CaP vs. <i>S. sanguinis</i> :TNZT - HF            | 0,6850        | -0,2967 to 1,667          | No         | ns          | 0,7188            |
| <b><i>S. gordonii</i>:TAV - CaP vs. <i>S. sanguinis</i>:TNZT - HFAg</b>     | <b>1,238</b>  | <b>0,2566 to 2,220</b>    | <b>Yes</b> | <b>***</b>  | <b>0,0009</b>     |
| <i>S. gordonii</i> :TAV - CaP vs. <i>A. naeslundii</i> :TAV - Control       | 0,2133        | -0,7684 to 1,195          | No         | ns          | >0,9999           |
| <i>S. gordonii</i> :TAV - CaP vs. <i>A. naeslundii</i> :TAV - CaP           | -0,1817       | -1,163 to 0,8001          | No         | ns          | >0,9999           |
| <i>S. gordonii</i> :TAV - CaP vs. <i>A. naeslundii</i> :TAV - CaPAg         | -0,3283       | -1,310 to 0,6534          | No         | ns          | >0,9999           |
| <i>S. gordonii</i> :TAV - CaP vs. <i>A. naeslundii</i> :TAV - HF            | 0,3823        | -0,6473 to 1,412          | No         | ns          | >0,9999           |
| <i>S. gordonii</i> :TAV - CaP vs. <i>A. naeslundii</i> :TAV - HFAg          | 0,5917        | -0,3901 to 1,573          | No         | ns          | 0,9297            |
| <i>S. gordonii</i> :TAV - CaP vs. <i>A. naeslundii</i> :TNZT - Control      | -0,3133       | -1,295 to 0,6684          | No         | ns          | >0,9999           |
| <i>S. gordonii</i> :TAV - CaP vs. <i>A. naeslundii</i> :TNZT - CaP          | -0,4833       | -1,465 to 0,4984          | No         | ns          | 0,9964            |
| <i>S. gordonii</i> :TAV - CaP vs. <i>A. naeslundii</i> :TNZT - CaPAg        | -0,1783       | -1,160 to 0,8034          | No         | ns          | >0,9999           |
| <i>S. gordonii</i> :TAV - CaP vs. <i>A. naeslundii</i> :TNZT - HF           | 0,3317        | -0,6501 to 1,313          | No         | ns          | >0,9999           |
| <i>S. gordonii</i> :TAV - CaP vs. <i>A. naeslundii</i> :TNZT - HFAg         | -0,007667     | -1,037 to 1,022           | No         | ns          | >0,9999           |
| <i>S. gordonii</i> :TAV - CaP vs. <i>P. gingivalis</i> :TAV - Control       | -0,1583       | -1,140 to 0,8234          | No         | ns          | >0,9999           |
| <i>S. gordonii</i> :TAV - CaP vs. <i>P. gingivalis</i> :TAV - CaP           | -0,7967       | -1,778 to 0,1851          | No         | ns          | 0,3631            |
| <b><i>S. gordonii</i>:TAV - CaP vs. <i>P. gingivalis</i>:TAV - CaPAg</b>    | <b>-1,193</b> | <b>-2,175 to -0,2116</b>  | <b>Yes</b> | <b>**</b>   | <b>0,0020</b>     |
| <i>S. gordonii</i> :TAV - CaP vs. <i>P. gingivalis</i> :TAV - HF            | -0,5283       | -1,510 to 0,4534          | No         | ns          | 0,9844            |
| <i>S. gordonii</i> :TAV - CaP vs. <i>P. gingivalis</i> :TAV - HFAg          | -0,5133       | -1,495 to 0,4684          | No         | ns          | 0,9900            |
| <i>S. gordonii</i> :TAV - CaP vs. <i>P. gingivalis</i> :TNZT - Control      | -0,2677       | -1,297 to 0,7620          | No         | ns          | >0,9999           |
| <b><i>S. gordonii</i>:TAV - CaP vs. <i>P. gingivalis</i>:TNZT - CaP</b>     | <b>-1,467</b> | <b>-2,564 to -0,3690</b>  | <b>Yes</b> | <b>***</b>  | <b>0,0002</b>     |
| <b><i>S. gordonii</i>:TAV - CaP vs. <i>P. gingivalis</i>:TNZT - CaPAg</b>   | <b>-1,450</b> | <b>-2,432 to -0,4683</b>  | <b>Yes</b> | <b>****</b> | <b>&lt;0,0001</b> |
| <i>S. gordonii</i> :TAV - CaP vs. <i>P. gingivalis</i> :TNZT - HF           | -0,7050       | -1,687 to 0,2767          | No         | ns          | 0,6563            |
| <b><i>S. gordonii</i>:TAV - CaP vs. <i>P. gingivalis</i>:TNZT - HFAg</b>    | <b>-1,145</b> | <b>-2,127 to -0,1633</b>  | <b>Yes</b> | <b>**</b>   | <b>0,0045</b>     |
| <i>S. gordonii</i> :TAV - CaPAg vs. <i>S. gordonii</i> :TAV - HF            | 0,02067       | -1,009 to 1,050           | No         | ns          | >0,9999           |
| <i>S. gordonii</i> :TAV - CaPAg vs. <i>S. gordonii</i> :TAV - HFAg          | 0,3200        | -0,6617 to 1,302          | No         | ns          | >0,9999           |
| <i>S. gordonii</i> :TAV - CaPAg vs. <i>S. gordonii</i> :TNZT - Control      | 0,06500       | -0,9167 to 1,047          | No         | ns          | >0,9999           |
| <i>S. gordonii</i> :TAV - CaPAg vs. <i>S. gordonii</i> :TNZT - CaP          | -0,4750       | -1,457 to 0,5067          | No         | ns          | 0,9973            |
| <i>S. gordonii</i> :TAV - CaPAg vs. <i>S. gordonii</i> :TNZT - CaPAg        | -0,04500      | -1,027 to 0,9367          | No         | ns          | >0,9999           |
| <i>S. gordonii</i> :TAV - CaPAg vs. <i>S. gordonii</i> :TNZT - HF           | 0,3250        | -0,6567 to 1,307          | No         | ns          | >0,9999           |
| <i>S. gordonii</i> :TAV - CaPAg vs. <i>S. gordonii</i> :TNZT - HFAg         | 0,2300        | -0,7517 to 1,212          | No         | ns          | >0,9999           |
| <i>S. gordonii</i> :TAV - CaPAg vs. <i>S. sanguinis</i> :TAV - Control      | 0,5383        | -0,4434 to 1,520          | No         | ns          | 0,9795            |
| <i>S. gordonii</i> :TAV - CaPAg vs. <i>S. sanguinis</i> :TAV - CaP          | 0,1467        | -0,8351 to 1,128          | No         | ns          | >0,9999           |
| <i>S. gordonii</i> :TAV - CaPAg vs. <i>S. sanguinis</i> :TAV - CaPAg        | 0,3233        | -0,6584 to 1,305          | No         | ns          | >0,9999           |
| <i>S. gordonii</i> :TAV - CaPAg vs. <i>S. sanguinis</i> :TAV - HF           | 0,1917        | -0,7901 to 1,173          | No         | ns          | >0,9999           |
| <i>S. gordonii</i> :TAV - CaPAg vs. <i>S. sanguinis</i> :TAV - HFAg         | 0,4867        | -0,4951 to 1,468          | No         | ns          | 0,9959            |
| <i>S. gordonii</i> :TAV - CaPAg vs. <i>S. sanguinis</i> :TNZT - Control     | -0,04833      | -1,030 to 0,9334          | No         | ns          | >0,9999           |
| <i>S. gordonii</i> :TAV - CaPAg vs. <i>S. sanguinis</i> :TNZT - CaP         | -0,2250       | -1,207 to 0,7567          | No         | ns          | >0,9999           |
| <i>S. gordonii</i> :TAV - CaPAg vs. <i>S. sanguinis</i> :TNZT - CaPAg       | 0,3333        | -0,6484 to 1,315          | No         | ns          | >0,9999           |
| <i>S. gordonii</i> :TAV - CaPAg vs. <i>S. sanguinis</i> :TNZT - HF          | 0,3233        | -0,6584 to 1,305          | No         | ns          | >0,9999           |
| <i>S. gordonii</i> :TAV - CaPAg vs. <i>S. sanguinis</i> :TNZT - HFAg        | 0,8767        | -0,1051 to 1,858          | No         | ns          | 0,1732            |
| <i>S. gordonii</i> :TAV - CaPAg vs. <i>A. naeslundii</i> :TAV - Control     | -0,1483       | -1,130 to 0,8334          | No         | ns          | >0,9999           |
| <i>S. gordonii</i> :TAV - CaPAg vs. <i>A. naeslundii</i> :TAV - CaP         | -0,5433       | -1,525 to 0,4384          | No         | ns          | 0,9766            |
| <i>S. gordonii</i> :TAV - CaPAg vs. <i>A. naeslundii</i> :TAV - CaPAg       | -0,6900       | -1,672 to 0,2917          | No         | ns          | 0,7035            |
| <i>S. gordonii</i> :TAV - CaPAg vs. <i>A. naeslundii</i> :TAV - HF          | 0,02067       | -1,009 to 1,050           | No         | ns          | >0,9999           |
| <i>S. gordonii</i> :TAV - CaPAg vs. <i>A. naeslundii</i> :TAV - HFAg        | 0,2300        | -0,7517 to 1,212          | No         | ns          | >0,9999           |
| <i>S. gordonii</i> :TAV - CaPAg vs. <i>A. naeslundii</i> :TNZT - Control    | -0,6750       | -1,657 to 0,3067          | No         | ns          | 0,7484            |
| <i>S. gordonii</i> :TAV - CaPAg vs. <i>A. naeslundii</i> :TNZT - CaP        | -0,8450       | -1,827 to 0,1367          | No         | ns          | 0,2376            |
| <i>S. gordonii</i> :TAV - CaPAg vs. <i>A. naeslundii</i> :TNZT - CaPAg      | -0,5400       | -1,522 to 0,4417          | No         | ns          | 0,9786            |
| <i>S. gordonii</i> :TAV - CaPAg vs. <i>A. naeslundii</i> :TNZT - HF         | -0,03000      | -1,012 to 0,9517          | No         | ns          | >0,9999           |
| <i>S. gordonii</i> :TAV - CaPAg vs. <i>A. naeslundii</i> :TNZT - HFAg       | -0,3693       | -1,399 to 0,6603          | No         | ns          | >0,9999           |
| <i>S. gordonii</i> :TAV - CaPAg vs. <i>P. gingivalis</i> :TAV - Control     | -0,5200       | -1,502 to 0,4617          | No         | ns          | 0,9878            |
| <b><i>S. gordonii</i>:TAV - CaPAg vs. <i>P. gingivalis</i>:TAV - CaP</b>    | <b>-1,158</b> | <b>-2,140 to -0,1766</b>  | <b>Yes</b> | <b>**</b>   | <b>0,0036</b>     |
| <b><i>S. gordonii</i>:TAV - CaPAg vs. <i>P. gingivalis</i>:TAV - CaPAg</b>  | <b>-1,555</b> | <b>-2,537 to -0,5733</b>  | <b>Yes</b> | <b>****</b> | <b>&lt;0,0001</b> |
| <i>S. gordonii</i> :TAV - CaPAg vs. <i>P. gingivalis</i> :TAV - HF          | -0,8900       | -1,872 to 0,09174         | No         | ns          | 0,1503            |
| <i>S. gordonii</i> :TAV - CaPAg vs. <i>P. gingivalis</i> :TAV - HFAg        | -0,8750       | -1,857 to 0,1067          | No         | ns          | 0,1762            |
| <i>S. gordonii</i> :TAV - CaPAg vs. <i>P. gingivalis</i> :TNZT - Control    | -0,6293       | -1,659 to 0,4003          | No         | ns          | 0,9174            |
| <b><i>S. gordonii</i>:TAV - CaPAg vs. <i>P. gingivalis</i>:TNZT - CaP</b>   | <b>-1,828</b> | <b>-2,926 to -0,7307</b>  | <b>Yes</b> | <b>****</b> | <b>&lt;0,0001</b> |
| <b><i>S. gordonii</i>:TAV - CaPAg vs. <i>P. gingivalis</i>:TNZT - CaPAg</b> | <b>-1,812</b> | <b>-2,793 to -0,8299</b>  | <b>Yes</b> | <b>****</b> | <b>&lt;0,0001</b> |
| <b><i>S. gordonii</i>:TAV - CaPAg vs. <i>P. gingivalis</i>:TNZT - HF</b>    | <b>-1,067</b> | <b>-2,048 to -0,08492</b> | <b>Yes</b> | <b>*</b>    | <b>0,0152</b>     |

|                                                                |                |                           |            |             |                   |
|----------------------------------------------------------------|----------------|---------------------------|------------|-------------|-------------------|
| <b>S. gordonii:TAV - CaPAg vs. P. gingivalis:TNZT - HFAG</b>   | <b>-1,507</b>  | <b>-2,488 to -0,5249</b>  | <b>Yes</b> | <b>****</b> | <b>&lt;0,0001</b> |
| S. gordonii:TAV - HF vs. S. gordonii:TAV - HFAG                | 0,2993         | -0,7303 to 1,329          | No         | ns          | >0,9999           |
| S. gordonii:TAV - HF vs. S. gordonii:TNZT - Control            | 0,04433        | -0,9853 to 1,074          | No         | ns          | >0,9999           |
| S. gordonii:TAV - HF vs. S. gordonii:TNZT - CaP                | -0,4957        | -1,525 to 0,5340          | No         | ns          | 0,9976            |
| S. gordonii:TAV - HF vs. S. gordonii:TNZT - CaPAg              | -0,06567       | -1,095 to 0,9640          | No         | ns          | >0,9999           |
| S. gordonii:TAV - HF vs. S. gordonii:TNZT - HF                 | 0,3043         | -0,7253 to 1,334          | No         | ns          | >0,9999           |
| S. gordonii:TAV - HF vs. S. gordonii:TNZT - HFAG               | 0,2093         | -0,8203 to 1,239          | No         | ns          | >0,9999           |
| S. gordonii:TAV - HF vs. S. sanguinis:TAV - Control            | 0,5177         | -0,5120 to 1,547          | No         | ns          | 0,9948            |
| S. gordonii:TAV - HF vs. S. sanguinis:TAV - CaP                | 0,1260         | -0,9037 to 1,156          | No         | ns          | >0,9999           |
| S. gordonii:TAV - HF vs. S. sanguinis:TAV - CaPAg              | 0,3027         | -0,7270 to 1,332          | No         | ns          | >0,9999           |
| S. gordonii:TAV - HF vs. S. sanguinis:TAV - HF                 | 0,1710         | -0,8587 to 1,201          | No         | ns          | >0,9999           |
| S. gordonii:TAV - HF vs. S. sanguinis:TAV - HFAG               | 0,4660         | -0,5637 to 1,496          | No         | ns          | 0,9993            |
| S. gordonii:TAV - HF vs. S. sanguinis:TNZT - Control           | -0,06900       | -1,099 to 0,9607          | No         | ns          | >0,9999           |
| S. gordonii:TAV - HF vs. S. sanguinis:TNZT - CaP               | -0,2457        | -1,275 to 0,7840          | No         | ns          | >0,9999           |
| S. gordonii:TAV - HF vs. S. sanguinis:TNZT - CaPAg             | 0,3127         | -0,7170 to 1,342          | No         | ns          | >0,9999           |
| S. gordonii:TAV - HF vs. S. sanguinis:TNZT - HF                | 0,3027         | -0,7270 to 1,332          | No         | ns          | >0,9999           |
| S. gordonii:TAV - HF vs. S. sanguinis:TNZT - HFAG              | 0,8560         | -0,1737 to 1,886          | No         | ns          | 0,3087            |
| S. gordonii:TAV - HF vs. A. naeslundii:TAV - Control           | -0,1690        | -1,199 to 0,8607          | No         | ns          | >0,9999           |
| S. gordonii:TAV - HF vs. A. naeslundii:TAV - CaP               | -0,5640        | -1,594 to 0,4657          | No         | ns          | 0,9798            |
| S. gordonii:TAV - HF vs. A. naeslundii:TAV - CaPAg             | -0,7107        | -1,740 to 0,3190          | No         | ns          | 0,7408            |
| S. gordonii:TAV - HF vs. A. naeslundii:TAV - HF                | 0,000          | -1,075 to 1,075           | No         | ns          | >0,9999           |
| S. gordonii:TAV - HF vs. A. naeslundii:TAV - HFAG              | 0,2093         | -0,8203 to 1,239          | No         | ns          | >0,9999           |
| S. gordonii:TAV - HF vs. A. naeslundii:TNZT - Control          | -0,6957        | -1,725 to 0,3340          | No         | ns          | 0,7813            |
| S. gordonii:TAV - HF vs. A. naeslundii:TNZT - CaP              | -0,8657        | -1,895 to 0,1640          | No         | ns          | 0,2847            |
| S. gordonii:TAV - HF vs. A. naeslundii:TNZT - CaPAg            | -0,5607        | -1,590 to 0,4690          | No         | ns          | 0,9815            |
| S. gordonii:TAV - HF vs. A. naeslundii:TNZT - HF               | -0,05067       | -1,080 to 0,9790          | No         | ns          | >0,9999           |
| S. gordonii:TAV - HF vs. A. naeslundii:TNZT - HFAG             | -0,3900        | -1,465 to 0,6854          | No         | ns          | >0,9999           |
| S. gordonii:TAV - HF vs. P. gingivalis:TAV - Control           | -0,5407        | -1,570 to 0,4890          | No         | ns          | 0,9893            |
| <b>S. gordonii:TAV - HF vs. P. gingivalis:TAV - CaP</b>        | <b>-1,179</b>  | <b>-2,209 to -0,1493</b>  | <b>Yes</b> | <b>**</b>   | <b>0,0063</b>     |
| <b>S. gordonii:TAV - HF vs. P. gingivalis:TAV - CaPAg</b>      | <b>-1,576</b>  | <b>-2,605 to -0,5460</b>  | <b>Yes</b> | <b>****</b> | <b>&lt;0,0001</b> |
| S. gordonii:TAV - HF vs. P. gingivalis:TAV - HF                | -0,9107        | -1,940 to 0,1190          | No         | ns          | 0,1888            |
| S. gordonii:TAV - HF vs. P. gingivalis:TAV - HFAG              | -0,8957        | -1,925 to 0,1340          | No         | ns          | 0,2179            |
| S. gordonii:TAV - HF vs. P. gingivalis:TNZT - Control          | -0,6500        | -1,725 to 0,4254          | No         | ns          | 0,9273            |
| <b>S. gordonii:TAV - HF vs. P. gingivalis:TNZT - CaP</b>       | <b>-1,849</b>  | <b>-2,990 to -0,7083</b>  | <b>Yes</b> | <b>****</b> | <b>&lt;0,0001</b> |
| <b>S. gordonii:TAV - HF vs. P. gingivalis:TNZT - CaPAg</b>     | <b>-1,832</b>  | <b>-2,862 to -0,8027</b>  | <b>Yes</b> | <b>****</b> | <b>&lt;0,0001</b> |
| <b>S. gordonii:TAV - HF vs. P. gingivalis:TNZT - HF</b>        | <b>-1,087</b>  | <b>-2,117 to -0,05767</b> | <b>Yes</b> | <b>*</b>    | <b>0,0235</b>     |
| <b>S. gordonii:TAV - HF vs. P. gingivalis:TNZT - HFAG</b>      | <b>-1,527</b>  | <b>-2,557 to -0,4977</b>  | <b>Yes</b> | <b>****</b> | <b>&lt;0,0001</b> |
| S. gordonii:TAV - HFAG vs. S. gordonii:TNZT - Control          | -0,2550        | -1,237 to 0,7267          | No         | ns          | >0,9999           |
| S. gordonii:TAV - HFAG vs. S. gordonii:TNZT - CaP              | -0,7950        | -1,777 to 0,1867          | No         | ns          | 0,3679            |
| S. gordonii:TAV - HFAG vs. S. gordonii:TNZT - CaPAg            | -0,3650        | -1,347 to 0,6167          | No         | ns          | >0,9999           |
| S. gordonii:TAV - HFAG vs. S. gordonii:TNZT - HF               | 0,005000       | -0,9767 to 0,9867         | No         | ns          | >0,9999           |
| S. gordonii:TAV - HFAG vs. S. gordonii:TNZT - HFAG             | -0,09000       | -1,072 to 0,8917          | No         | ns          | >0,9999           |
| S. gordonii:TAV - HFAG vs. S. sanguinis:TAV - Control          | 0,2183         | -0,7634 to 1,200          | No         | ns          | >0,9999           |
| S. gordonii:TAV - HFAG vs. S. sanguinis:TAV - CaP              | -0,1733        | -1,155 to 0,8084          | No         | ns          | >0,9999           |
| S. gordonii:TAV - HFAG vs. S. sanguinis:TAV - CaPAg            | 0,003333       | -0,9784 to 0,9851         | No         | ns          | >0,9999           |
| S. gordonii:TAV - HFAG vs. S. sanguinis:TAV - HF               | -0,1283        | -1,110 to 0,8534          | No         | ns          | >0,9999           |
| S. gordonii:TAV - HFAG vs. S. sanguinis:TAV - HFAG             | 0,1667         | -0,8151 to 1,148          | No         | ns          | >0,9999           |
| S. gordonii:TAV - HFAG vs. S. sanguinis:TNZT - Control         | -0,3683        | -1,350 to 0,6134          | No         | ns          | >0,9999           |
| S. gordonii:TAV - HFAG vs. S. sanguinis:TNZT - CaP             | -0,5450        | -1,527 to 0,4367          | No         | ns          | 0,9756            |
| S. gordonii:TAV - HFAG vs. S. sanguinis:TNZT - CaPAg           | 0,01333        | -0,9684 to 0,9951         | No         | ns          | >0,9999           |
| S. gordonii:TAV - HFAG vs. S. sanguinis:TNZT - HF              | 0,003333       | -0,9784 to 0,9851         | No         | ns          | >0,9999           |
| S. gordonii:TAV - HFAG vs. S. sanguinis:TNZT - HFAG            | 0,5567         | -0,4251 to 1,538          | No         | ns          | 0,9673            |
| S. gordonii:TAV - HFAG vs. A. naeslundii:TAV - Control         | -0,4683        | -1,450 to 0,5134          | No         | ns          | 0,9979            |
| S. gordonii:TAV - HFAG vs. A. naeslundii:TAV - CaP             | -0,8633        | -1,845 to 0,1184          | No         | ns          | 0,1986            |
| <b>S. gordonii:TAV - HFAG vs. A. naeslundii:TAV - CaPAg</b>    | <b>-1,010</b>  | <b>-1,992 to -0,02826</b> | <b>Yes</b> | <b>*</b>    | <b>0,0342</b>     |
| S. gordonii:TAV - HFAG vs. A. naeslundii:TAV - HF              | -0,2993        | -1,329 to 0,7303          | No         | ns          | >0,9999           |
| S. gordonii:TAV - HFAG vs. A. naeslundii:TAV - HFAG            | -0,09000       | -1,072 to 0,8917          | No         | ns          | >0,9999           |
| <b>S. gordonii:TAV - HFAG vs. A. naeslundii:TNZT - Control</b> | <b>-0,9950</b> | <b>-1,977 to -0,01326</b> | <b>Yes</b> | <b>*</b>    | <b>0,0419</b>     |
| <b>S. gordonii:TAV - HFAG vs. A. naeslundii:TNZT - CaP</b>     | <b>-1,165</b>  | <b>-2,147 to -0,1833</b>  | <b>Yes</b> | <b>**</b>   | <b>0,0032</b>     |
| S. gordonii:TAV - HFAG vs. A. naeslundii:TNZT - CaPAg          | -0,8600        | -1,842 to 0,1217          | No         | ns          | 0,2053            |
| S. gordonii:TAV - HFAG vs. A. naeslundii:TNZT - HF             | -0,3500        | -1,332 to 0,6317          | No         | ns          | >0,9999           |
| S. gordonii:TAV - HFAG vs. A. naeslundii:TNZT - HFAG           | -0,6893        | -1,719 to 0,3403          | No         | ns          | 0,7975            |
| S. gordonii:TAV - HFAG vs. P. gingivalis:TAV - Control         | -0,8400        | -1,822 to 0,1417          | No         | ns          | 0,2491            |
| <b>S. gordonii:TAV - HFAG vs. P. gingivalis:TAV - CaP</b>      | <b>-1,478</b>  | <b>-2,460 to -0,4966</b>  | <b>Yes</b> | <b>****</b> | <b>&lt;0,0001</b> |
| <b>S. gordonii:TAV - HFAG vs. P. gingivalis:TAV - CaPAg</b>    | <b>-1,875</b>  | <b>-2,857 to -0,8933</b>  | <b>Yes</b> | <b>****</b> | <b>&lt;0,0001</b> |
| <b>S. gordonii:TAV - HFAG vs. P. gingivalis:TAV - HF</b>       | <b>-1,210</b>  | <b>-2,192 to -0,2283</b>  | <b>Yes</b> | <b>**</b>   | <b>0,0015</b>     |
| <b>S. gordonii:TAV - HFAG vs. P. gingivalis:TAV - HFAG</b>     | <b>-1,195</b>  | <b>-2,177 to -0,2133</b>  | <b>Yes</b> | <b>**</b>   | <b>0,0020</b>     |
| S. gordonii:TAV - HFAG vs. P. gingivalis:TNZT - Control        | -0,9493        | -1,979 to 0,08033         | No         | ns          | 0,1272            |
| <b>S. gordonii:TAV - HFAG vs. P. gingivalis:TNZT - CaP</b>     | <b>-2,148</b>  | <b>-3,246 to -1,051</b>   | <b>Yes</b> | <b>****</b> | <b>&lt;0,0001</b> |
| <b>S. gordonii:TAV - HFAG vs. P. gingivalis:TNZT - CaPAg</b>   | <b>-2,132</b>  | <b>-3,113 to -1,150</b>   | <b>Yes</b> | <b>****</b> | <b>&lt;0,0001</b> |
| <b>S. gordonii:TAV - HFAG vs. P. gingivalis:TNZT - HF</b>      | <b>-1,387</b>  | <b>-2,368 to -0,4049</b>  | <b>Yes</b> | <b>****</b> | <b>&lt;0,0001</b> |
| <b>S. gordonii:TAV - HFAG vs. P. gingivalis:TNZT - HFAG</b>    | <b>-1,827</b>  | <b>-2,808 to -0,8449</b>  | <b>Yes</b> | <b>****</b> | <b>&lt;0,0001</b> |

|                                                                                |               |                           |            |             |                   |
|--------------------------------------------------------------------------------|---------------|---------------------------|------------|-------------|-------------------|
| <i>S. gordonii</i> :TNZT - Control vs. <i>S. gordonii</i> :TNZT - CaP          | -0,5400       | -1,522 to 0,4417          | No         | ns          | 0,9786            |
| <i>S. gordonii</i> :TNZT - Control vs. <i>S. gordonii</i> :TNZT - CaPAg        | -0,1100       | -1,092 to 0,8717          | No         | ns          | >0,9999           |
| <i>S. gordonii</i> :TNZT - Control vs. <i>S. gordonii</i> :TNZT - HF           | 0,2600        | -0,7217 to 1,242          | No         | ns          | >0,9999           |
| <i>S. gordonii</i> :TNZT - Control vs. <i>S. gordonii</i> :TNZT - HFAg         | 0,1650        | -0,8167 to 1,147          | No         | ns          | >0,9999           |
| <i>S. gordonii</i> :TNZT - Control vs. <i>S. sanguinis</i> :TAV - Control      | 0,4733        | -0,5084 to 1,455          | No         | ns          | 0,9975            |
| <i>S. gordonii</i> :TNZT - Control vs. <i>S. sanguinis</i> :TAV - CaP          | 0,08167       | -0,9001 to 1,063          | No         | ns          | >0,9999           |
| <i>S. gordonii</i> :TNZT - Control vs. <i>S. sanguinis</i> :TAV - CaPAg        | 0,2583        | -0,7234 to 1,240          | No         | ns          | >0,9999           |
| <i>S. gordonii</i> :TNZT - Control vs. <i>S. sanguinis</i> :TAV - HF           | 0,1267        | -0,8551 to 1,108          | No         | ns          | >0,9999           |
| <i>S. gordonii</i> :TNZT - Control vs. <i>S. sanguinis</i> :TAV - HFAg         | 0,4217        | -0,5601 to 1,403          | No         | ns          | 0,9997            |
| <i>S. gordonii</i> :TNZT - Control vs. <i>S. sanguinis</i> :TNZT - Control     | -0,1133       | -1,095 to 0,8684          | No         | ns          | >0,9999           |
| <i>S. gordonii</i> :TNZT - Control vs. <i>S. sanguinis</i> :TNZT - CaP         | -0,2900       | -1,272 to 0,6917          | No         | ns          | >0,9999           |
| <i>S. gordonii</i> :TNZT - Control vs. <i>S. sanguinis</i> :TNZT - CaPAg       | 0,2683        | -0,7134 to 1,250          | No         | ns          | >0,9999           |
| <i>S. gordonii</i> :TNZT - Control vs. <i>S. sanguinis</i> :TNZT - HF          | 0,2583        | -0,7234 to 1,240          | No         | ns          | >0,9999           |
| <i>S. gordonii</i> :TNZT - Control vs. <i>S. sanguinis</i> :TNZT - HFAg        | 0,8117        | -0,1701 to 1,793          | No         | ns          | 0,3208            |
| <i>S. gordonii</i> :TNZT - Control vs. <i>A. naeslundii</i> :TAV - Control     | -0,2133       | -1,195 to 0,7684          | No         | ns          | >0,9999           |
| <i>S. gordonii</i> :TNZT - Control vs. <i>A. naeslundii</i> :TAV - CaP         | -0,6083       | -1,590 to 0,3734          | No         | ns          | 0,9040            |
| <i>S. gordonii</i> :TNZT - Control vs. <i>A. naeslundii</i> :TAV - CaPAg       | -0,7550       | -1,737 to 0,2267          | No         | ns          | 0,4924            |
| <i>S. gordonii</i> :TNZT - Control vs. <i>A. naeslundii</i> :TAV - HF          | -0,04433      | -1,074 to 0,9853          | No         | ns          | >0,9999           |
| <i>S. gordonii</i> :TNZT - Control vs. <i>A. naeslundii</i> :TAV - HFAg        | 0,1650        | -0,8167 to 1,147          | No         | ns          | >0,9999           |
| <i>S. gordonii</i> :TNZT - Control vs. <i>A. naeslundii</i> :TNZT - Control    | -0,7400       | -1,722 to 0,2417          | No         | ns          | 0,5416            |
| <i>S. gordonii</i> :TNZT - Control vs. <i>A. naeslundii</i> :TNZT - CaP        | -0,9100       | -1,892 to 0,07174         | No         | ns          | 0,1204            |
| <i>S. gordonii</i> :TNZT - Control vs. <i>A. naeslundii</i> :TNZT - CaPAg      | -0,6050       | -1,587 to 0,3767          | No         | ns          | 0,9096            |
| <i>S. gordonii</i> :TNZT - Control vs. <i>A. naeslundii</i> :TNZT - HF         | -0,09500      | -1,077 to 0,8867          | No         | ns          | >0,9999           |
| <i>S. gordonii</i> :TNZT - Control vs. <i>A. naeslundii</i> :TNZT - HFAg       | -0,4343       | -1,464 to 0,5953          | No         | ns          | 0,9998            |
| <i>S. gordonii</i> :TNZT - Control vs. <i>P. gingivalis</i> :TAV - Control     | -0,5850       | -1,567 to 0,3967          | No         | ns          | 0,9385            |
| <b><i>S. gordonii</i>:TNZT - Control vs. <i>P. gingivalis</i>:TAV - CaP</b>    | <b>-1,223</b> | <b>-2,205 to -0,2416</b>  | <b>Yes</b> | <b>**</b>   | <b>0,0012</b>     |
| <b><i>S. gordonii</i>:TNZT - Control vs. <i>P. gingivalis</i>:TAV - CaPAg</b>  | <b>-1,620</b> | <b>-2,602 to -0,6383</b>  | <b>Yes</b> | <b>****</b> | <b>&lt;0,0001</b> |
| <i>S. gordonii</i> :TNZT - Control vs. <i>P. gingivalis</i> :TAV - HF          | -0,9550       | -1,937 to 0,02674         | No         | ns          | 0,0704            |
| <i>S. gordonii</i> :TNZT - Control vs. <i>P. gingivalis</i> :TAV - HFAg        | -0,9400       | -1,922 to 0,04174         | No         | ns          | 0,0847            |
| <i>S. gordonii</i> :TNZT - Control vs. <i>P. gingivalis</i> :TNZT - Control    | -0,6943       | -1,724 to 0,3353          | No         | ns          | 0,7847            |
| <b><i>S. gordonii</i>:TNZT - Control vs. <i>P. gingivalis</i>:TNZT - CaP</b>   | <b>-1,893</b> | <b>-2,991 to -0,7957</b>  | <b>Yes</b> | <b>****</b> | <b>&lt;0,0001</b> |
| <b><i>S. gordonii</i>:TNZT - Control vs. <i>P. gingivalis</i>:TNZT - CaPAg</b> | <b>-1,877</b> | <b>-2,858 to -0,8949</b>  | <b>Yes</b> | <b>****</b> | <b>&lt;0,0001</b> |
| <b><i>S. gordonii</i>:TNZT - Control vs. <i>P. gingivalis</i>:TNZT - HF</b>    | <b>-1,132</b> | <b>-2,113 to -0,1499</b>  | <b>Yes</b> | <b>**</b>   | <b>0,0056</b>     |
| <b><i>S. gordonii</i>:TNZT - Control vs. <i>P. gingivalis</i>:TNZT - HFAg</b>  | <b>-1,572</b> | <b>-2,553 to -0,5899</b>  | <b>Yes</b> | <b>****</b> | <b>&lt;0,0001</b> |
| <i>S. gordonii</i> :TNZT - CaP vs. <i>S. gordonii</i> :TNZT - CaPAg            | 0,4300        | -0,5517 to 1,412          | No         | ns          | 0,9996            |
| <i>S. gordonii</i> :TNZT - CaP vs. <i>S. gordonii</i> :TNZT - HF               | 0,8000        | -0,1817 to 1,782          | No         | ns          | 0,3535            |
| <i>S. gordonii</i> :TNZT - CaP vs. <i>S. gordonii</i> :TNZT - HFAg             | 0,7050        | -0,2767 to 1,687          | No         | ns          | 0,6563            |
| <b><i>S. gordonii</i>:TNZT - CaP vs. <i>S. sanguinis</i>:TAV - Control</b>     | <b>1,013</b>  | <b>0,03159 to 1,995</b>   | <b>Yes</b> | <b>*</b>    | <b>0,0327</b>     |
| <i>S. gordonii</i> :TNZT - CaP vs. <i>S. sanguinis</i> :TAV - CaP              | 0,6217        | -0,3601 to 1,603          | No         | ns          | 0,8795            |
| <i>S. gordonii</i> :TNZT - CaP vs. <i>S. sanguinis</i> :TAV - CaPAg            | 0,7983        | -0,1834 to 1,780          | No         | ns          | 0,3583            |
| <i>S. gordonii</i> :TNZT - CaP vs. <i>S. sanguinis</i> :TAV - HF               | 0,6667        | -0,3151 to 1,648          | No         | ns          | 0,7720            |
| <i>S. gordonii</i> :TNZT - CaP vs. <i>S. sanguinis</i> :TAV - HFAg             | 0,9617        | -0,02008 to 1,943         | No         | ns          | 0,0647            |
| <i>S. gordonii</i> :TNZT - CaP vs. <i>S. sanguinis</i> :TNZT - Control         | 0,4267        | -0,5551 to 1,408          | No         | ns          | 0,9997            |
| <i>S. gordonii</i> :TNZT - CaP vs. <i>S. sanguinis</i> :TNZT - CaP             | 0,2500        | -0,7317 to 1,232          | No         | ns          | >0,9999           |
| <i>S. gordonii</i> :TNZT - CaP vs. <i>S. sanguinis</i> :TNZT - CaPAg           | 0,8083        | -0,1734 to 1,790          | No         | ns          | 0,3300            |
| <i>S. gordonii</i> :TNZT - CaP vs. <i>S. sanguinis</i> :TNZT - HF              | 0,7983        | -0,1834 to 1,780          | No         | ns          | 0,3583            |
| <b><i>S. gordonii</i>:TNZT - CaP vs. <i>S. sanguinis</i>:TNZT - HFAg</b>       | <b>1,352</b>  | <b>0,3699 to 2,333</b>    | <b>Yes</b> | <b>***</b>  | <b>0,0001</b>     |
| <i>S. gordonii</i> :TNZT - CaP vs. <i>A. naeslundii</i> :TAV - Control         | 0,3267        | -0,6551 to 1,308          | No         | ns          | >0,9999           |
| <i>S. gordonii</i> :TNZT - CaP vs. <i>A. naeslundii</i> :TAV - CaP             | -0,06833      | -1,050 to 0,9134          | No         | ns          | >0,9999           |
| <i>S. gordonii</i> :TNZT - CaP vs. <i>A. naeslundii</i> :TAV - CaPAg           | -0,2150       | -1,197 to 0,7667          | No         | ns          | >0,9999           |
| <i>S. gordonii</i> :TNZT - CaP vs. <i>A. naeslundii</i> :TAV - HF              | 0,4957        | -0,5340 to 1,525          | No         | ns          | 0,9976            |
| <i>S. gordonii</i> :TNZT - CaP vs. <i>A. naeslundii</i> :TAV - HFAg            | 0,7050        | -0,2767 to 1,687          | No         | ns          | 0,6563            |
| <i>S. gordonii</i> :TNZT - CaP vs. <i>A. naeslundii</i> :TNZT - Control        | -0,2000       | -1,182 to 0,7817          | No         | ns          | >0,9999           |
| <i>S. gordonii</i> :TNZT - CaP vs. <i>A. naeslundii</i> :TNZT - CaP            | -0,3700       | -1,352 to 0,6117          | No         | ns          | >0,9999           |
| <i>S. gordonii</i> :TNZT - CaP vs. <i>A. naeslundii</i> :TNZT - CaPAg          | -0,06500      | -1,047 to 0,9167          | No         | ns          | >0,9999           |
| <i>S. gordonii</i> :TNZT - CaP vs. <i>A. naeslundii</i> :TNZT - HF             | 0,4450        | -0,5367 to 1,427          | No         | ns          | 0,9992            |
| <i>S. gordonii</i> :TNZT - CaP vs. <i>A. naeslundii</i> :TNZT - HFAg           | 0,1057        | -0,9240 to 1,135          | No         | ns          | >0,9999           |
| <i>S. gordonii</i> :TNZT - CaP vs. <i>P. gingivalis</i> :TAV - Control         | -0,04500      | -1,027 to 0,9367          | No         | ns          | >0,9999           |
| <i>S. gordonii</i> :TNZT - CaP vs. <i>P. gingivalis</i> :TAV - CaP             | -0,6833       | -1,665 to 0,2984          | No         | ns          | 0,7238            |
| <b><i>S. gordonii</i>:TNZT - CaP vs. <i>P. gingivalis</i>:TAV - CaPAg</b>      | <b>-1,080</b> | <b>-2,062 to -0,09826</b> | <b>Yes</b> | <b>*</b>    | <b>0,0125</b>     |
| <i>S. gordonii</i> :TNZT - CaP vs. <i>P. gingivalis</i> :TAV - HF              | -0,4150       | -1,397 to 0,5667          | No         | ns          | 0,9998            |
| <i>S. gordonii</i> :TNZT - CaP vs. <i>P. gingivalis</i> :TAV - HFAg            | -0,4000       | -1,382 to 0,5817          | No         | ns          | >0,9999           |
| <i>S. gordonii</i> :TNZT - CaP vs. <i>P. gingivalis</i> :TNZT - Control        | -0,1543       | -1,184 to 0,8753          | No         | ns          | >0,9999           |
| <b><i>S. gordonii</i>:TNZT - CaP vs. <i>P. gingivalis</i>:TNZT - CaP</b>       | <b>-1,353</b> | <b>-2,451 to -0,2557</b>  | <b>Yes</b> | <b>**</b>   | <b>0,0015</b>     |
| <b><i>S. gordonii</i>:TNZT - CaP vs. <i>P. gingivalis</i>:TNZT - CaPAg</b>     | <b>-1,337</b> | <b>-2,318 to -0,3549</b>  | <b>Yes</b> | <b>***</b>  | <b>0,0002</b>     |
| <i>S. gordonii</i> :TNZT - CaP vs. <i>P. gingivalis</i> :TNZT - HF             | -0,5917       | -1,573 to 0,3901          | No         | ns          | 0,9297            |
| <b><i>S. gordonii</i>:TNZT - CaP vs. <i>P. gingivalis</i>:TNZT - HFAg</b>      | <b>-1,032</b> | <b>-2,013 to -0,04992</b> | <b>Yes</b> | <b>*</b>    | <b>0,0253</b>     |
| <i>S. gordonii</i> :TNZT - CaPAg vs. <i>S. gordonii</i> :TNZT - HF             | 0,3700        | -0,6117 to 1,352          | No         | ns          | >0,9999           |
| <i>S. gordonii</i> :TNZT - CaPAg vs. <i>S. gordonii</i> :TNZT - HFAg           | 0,2750        | -0,7067 to 1,257          | No         | ns          | >0,9999           |
| <i>S. gordonii</i> :TNZT - CaPAg vs. <i>S. sanguinis</i> :TAV - Control        | 0,5833        | -0,3984 to 1,565          | No         | ns          | 0,9405            |
| <i>S. gordonii</i> :TNZT - CaPAg vs. <i>S. sanguinis</i> :TAV - CaP            | 0,1917        | -0,7901 to 1,173          | No         | ns          | >0,9999           |
| <i>S. gordonii</i> :TNZT - CaPAg vs. <i>S. sanguinis</i> :TAV - CaPAg          | 0,3683        | -0,6134 to 1,350          | No         | ns          | >0,9999           |

|                                                                              |               |                           |            |             |                   |
|------------------------------------------------------------------------------|---------------|---------------------------|------------|-------------|-------------------|
| <i>S. gordonii</i> :TNZT - CaPAg vs. <i>S. sanguinis</i> :TAV - HF           | 0,2367        | -0,7451 to 1,218          | No         | ns          | >0,9999           |
| <i>S. gordonii</i> :TNZT - CaPAg vs. <i>S. sanguinis</i> :TAV - HFAg         | 0,5317        | -0,4501 to 1,513          | No         | ns          | 0,9829            |
| <i>S. gordonii</i> :TNZT - CaPAg vs. <i>S. sanguinis</i> :TNZT - Control     | -0,003333     | -0,9851 to 0,9784         | No         | ns          | >0,9999           |
| <i>S. gordonii</i> :TNZT - CaPAg vs. <i>S. sanguinis</i> :TNZT - CaP         | -0,1800       | -1,162 to 0,8017          | No         | ns          | >0,9999           |
| <i>S. gordonii</i> :TNZT - CaPAg vs. <i>S. sanguinis</i> :TNZT - CaPAg       | 0,3783        | -0,6034 to 1,360          | No         | ns          | >0,9999           |
| <i>S. gordonii</i> :TNZT - CaPAg vs. <i>S. sanguinis</i> :TNZT - HF          | 0,3683        | -0,6134 to 1,350          | No         | ns          | >0,9999           |
| <i>S. gordonii</i> :TNZT - CaPAg vs. <i>S. sanguinis</i> :TNZT - HFAg        | 0,9217        | -0,06008 to 1,903         | No         | ns          | 0,1053            |
| <i>S. gordonii</i> :TNZT - CaPAg vs. <i>A. naeslundii</i> :TAV - Control     | -0,1033       | -1,085 to 0,8784          | No         | ns          | >0,9999           |
| <i>S. gordonii</i> :TNZT - CaPAg vs. <i>A. naeslundii</i> :TAV - CaP         | -0,4983       | -1,480 to 0,4834          | No         | ns          | 0,9939            |
| <i>S. gordonii</i> :TNZT - CaPAg vs. <i>A. naeslundii</i> :TAV - CaPAg       | -0,6450       | -1,627 to 0,3367          | No         | ns          | 0,8283            |
| <i>S. gordonii</i> :TNZT - CaPAg vs. <i>A. naeslundii</i> :TAV - HF          | 0,06567       | -0,9640 to 1,095          | No         | ns          | >0,9999           |
| <i>S. gordonii</i> :TNZT - CaPAg vs. <i>A. naeslundii</i> :TAV - HFAg        | 0,2750        | -0,7067 to 1,257          | No         | ns          | >0,9999           |
| <i>S. gordonii</i> :TNZT - CaPAg vs. <i>A. naeslundii</i> :TNZT - Control    | -0,6300       | -1,612 to 0,3517          | No         | ns          | 0,8624            |
| <i>S. gordonii</i> :TNZT - CaPAg vs. <i>A. naeslundii</i> :TNZT - CaP        | -0,8000       | -1,782 to 0,1817          | No         | ns          | 0,3535            |
| <i>S. gordonii</i> :TNZT - CaPAg vs. <i>A. naeslundii</i> :TNZT - CaPAg      | -0,4950       | -1,477 to 0,4867          | No         | ns          | 0,9945            |
| <i>S. gordonii</i> :TNZT - CaPAg vs. <i>A. naeslundii</i> :TNZT - HF         | 0,01500       | -0,9667 to 0,9967         | No         | ns          | >0,9999           |
| <i>S. gordonii</i> :TNZT - CaPAg vs. <i>A. naeslundii</i> :TNZT - HFAg       | -0,3243       | -1,354 to 0,7053          | No         | ns          | >0,9999           |
| <i>S. gordonii</i> :TNZT - CaPAg vs. <i>P. gingivalis</i> :TAV - Control     | -0,4750       | -1,457 to 0,5067          | No         | ns          | 0,9973            |
| <b><i>S. gordonii</i>:TNZT - CaPAg vs. <i>P. gingivalis</i>:TAV - CaP</b>    | <b>-1,113</b> | <b>-2,095 to -0,1316</b>  | <b>Yes</b> | <b>**</b>   | <b>0,0075</b>     |
| <b><i>S. gordonii</i>:TNZT - CaPAg vs. <i>P. gingivalis</i>:TAV - CaPAg</b>  | <b>-1,510</b> | <b>-2,492 to -0,5283</b>  | <b>Yes</b> | <b>****</b> | <b>&lt;0,0001</b> |
| <i>S. gordonii</i> :TNZT - CaPAg vs. <i>P. gingivalis</i> :TAV - HF          | -0,8450       | -1,827 to 0,1367          | No         | ns          | 0,2376            |
| <i>S. gordonii</i> :TNZT - CaPAg vs. <i>P. gingivalis</i> :TAV - HFAg        | -0,8300       | -1,812 to 0,1517          | No         | ns          | 0,2731            |
| <i>S. gordonii</i> :TNZT - CaPAg vs. <i>P. gingivalis</i> :TNZT - Control    | -0,5843       | -1,614 to 0,4453          | No         | ns          | 0,9669            |
| <b><i>S. gordonii</i>:TNZT - CaPAg vs. <i>P. gingivalis</i>:TNZT - CaP</b>   | <b>-1,783</b> | <b>-2,881 to -0,6857</b>  | <b>Yes</b> | <b>****</b> | <b>&lt;0,0001</b> |
| <b><i>S. gordonii</i>:TNZT - CaPAg vs. <i>P. gingivalis</i>:TNZT - CaPAg</b> | <b>-1,767</b> | <b>-2,748 to -0,7849</b>  | <b>Yes</b> | <b>****</b> | <b>&lt;0,0001</b> |
| <b><i>S. gordonii</i>:TNZT - CaPAg vs. <i>P. gingivalis</i>:TNZT - HF</b>    | <b>-1,022</b> | <b>-2,003 to -0,03992</b> | <b>Yes</b> | <b>*</b>    | <b>0,0291</b>     |
| <b><i>S. gordonii</i>:TNZT - CaPAg vs. <i>P. gingivalis</i>:TNZT - HFAg</b>  | <b>-1,462</b> | <b>-2,443 to -0,4799</b>  | <b>Yes</b> | <b>****</b> | <b>&lt;0,0001</b> |
| <i>S. gordonii</i> :TNZT - HF vs. <i>S. gordonii</i> :TNZT - HFAg            | -0,09500      | -1,077 to 0,8867          | No         | ns          | >0,9999           |
| <i>S. gordonii</i> :TNZT - HF vs. <i>S. sanguinis</i> :TAV - Control         | 0,2133        | -0,7684 to 1,195          | No         | ns          | >0,9999           |
| <i>S. gordonii</i> :TNZT - HF vs. <i>S. sanguinis</i> :TAV - CaP             | -0,1783       | -1,160 to 0,8034          | No         | ns          | >0,9999           |
| <i>S. gordonii</i> :TNZT - HF vs. <i>S. sanguinis</i> :TAV - CaPAg           | -0,001667     | -0,9834 to 0,9801         | No         | ns          | >0,9999           |
| <i>S. gordonii</i> :TNZT - HF vs. <i>S. sanguinis</i> :TAV - HF              | -0,1333       | -1,115 to 0,8484          | No         | ns          | >0,9999           |
| <i>S. gordonii</i> :TNZT - HF vs. <i>S. sanguinis</i> :TAV - HFAg            | 0,1617        | -0,8201 to 1,143          | No         | ns          | >0,9999           |
| <i>S. gordonii</i> :TNZT - HF vs. <i>S. sanguinis</i> :TNZT - Control        | -0,3733       | -1,355 to 0,6084          | No         | ns          | >0,9999           |
| <i>S. gordonii</i> :TNZT - HF vs. <i>S. sanguinis</i> :TNZT - CaP            | -0,5500       | -1,532 to 0,4317          | No         | ns          | 0,9722            |
| <i>S. gordonii</i> :TNZT - HF vs. <i>S. sanguinis</i> :TNZT - CaPAg          | 0,008333      | -0,9734 to 0,9901         | No         | ns          | >0,9999           |
| <i>S. gordonii</i> :TNZT - HF vs. <i>S. sanguinis</i> :TNZT - HF             | -0,001667     | -0,9834 to 0,9801         | No         | ns          | >0,9999           |
| <i>S. gordonii</i> :TNZT - HF vs. <i>S. sanguinis</i> :TNZT - HFAg           | 0,5517        | -0,4301 to 1,533          | No         | ns          | 0,9710            |
| <i>S. gordonii</i> :TNZT - HF vs. <i>A. naeslundii</i> :TAV - Control        | -0,4733       | -1,455 to 0,5084          | No         | ns          | 0,9975            |
| <i>S. gordonii</i> :TNZT - HF vs. <i>A. naeslundii</i> :TAV - CaP            | -0,8683       | -1,850 to 0,1134          | No         | ns          | 0,1887            |
| <b><i>S. gordonii</i>:TNZT - HF vs. <i>A. naeslundii</i>:TAV - CaPAg</b>     | <b>-1,015</b> | <b>-1,997 to -0,03326</b> | <b>Yes</b> | <b>*</b>    | <b>0,0319</b>     |
| <i>S. gordonii</i> :TNZT - HF vs. <i>A. naeslundii</i> :TAV - HF             | -0,3043       | -1,334 to 0,7253          | No         | ns          | >0,9999           |
| <i>S. gordonii</i> :TNZT - HF vs. <i>A. naeslundii</i> :TAV - HFAg           | -0,09500      | -1,077 to 0,8867          | No         | ns          | >0,9999           |
| <b><i>S. gordonii</i>:TNZT - HF vs. <i>A. naeslundii</i>:TNZT - Control</b>  | <b>-1,000</b> | <b>-1,982 to -0,01826</b> | <b>Yes</b> | <b>*</b>    | <b>0,0392</b>     |
| <b><i>S. gordonii</i>:TNZT - HF vs. <i>A. naeslundii</i>:TNZT - CaP</b>      | <b>-1,170</b> | <b>-2,152 to -0,1883</b>  | <b>Yes</b> | <b>**</b>   | <b>0,0030</b>     |
| <i>S. gordonii</i> :TNZT - HF vs. <i>A. naeslundii</i> :TNZT - CaPAg         | -0,8650       | -1,847 to 0,1167          | No         | ns          | 0,1952            |
| <i>S. gordonii</i> :TNZT - HF vs. <i>A. naeslundii</i> :TNZT - HF            | -0,3550       | -1,337 to 0,6267          | No         | ns          | >0,9999           |
| <i>S. gordonii</i> :TNZT - HF vs. <i>A. naeslundii</i> :TNZT - HFAg          | -0,6943       | -1,724 to 0,3353          | No         | ns          | 0,7847            |
| <i>S. gordonii</i> :TNZT - HF vs. <i>P. gingivalis</i> :TAV - Control        | -0,8450       | -1,827 to 0,1367          | No         | ns          | 0,2376            |
| <b><i>S. gordonii</i>:TNZT - HF vs. <i>P. gingivalis</i>:TAV - CaP</b>       | <b>-1,483</b> | <b>-2,465 to -0,5016</b>  | <b>Yes</b> | <b>****</b> | <b>&lt;0,0001</b> |
| <b><i>S. gordonii</i>:TNZT - HF vs. <i>P. gingivalis</i>:TAV - CaPAg</b>     | <b>-1,880</b> | <b>-2,862 to -0,8983</b>  | <b>Yes</b> | <b>****</b> | <b>&lt;0,0001</b> |
| <b><i>S. gordonii</i>:TNZT - HF vs. <i>P. gingivalis</i>:TAV - HF</b>        | <b>-1,215</b> | <b>-2,197 to -0,2333</b>  | <b>Yes</b> | <b>**</b>   | <b>0,0014</b>     |
| <b><i>S. gordonii</i>:TNZT - HF vs. <i>P. gingivalis</i>:TAV - HFAg</b>      | <b>-1,200</b> | <b>-2,182 to -0,2183</b>  | <b>Yes</b> | <b>**</b>   | <b>0,0018</b>     |
| <i>S. gordonii</i> :TNZT - HF vs. <i>P. gingivalis</i> :TNZT - Control       | -0,9543       | -1,984 to 0,07533         | No         | ns          | 0,1205            |
| <b><i>S. gordonii</i>:TNZT - HF vs. <i>P. gingivalis</i>:TNZT - CaP</b>      | <b>-2,153</b> | <b>-3,251 to -1,056</b>   | <b>Yes</b> | <b>****</b> | <b>&lt;0,0001</b> |
| <b><i>S. gordonii</i>:TNZT - HF vs. <i>P. gingivalis</i>:TNZT - CaPAg</b>    | <b>-2,137</b> | <b>-3,118 to -1,155</b>   | <b>Yes</b> | <b>****</b> | <b>&lt;0,0001</b> |
| <b><i>S. gordonii</i>:TNZT - HF vs. <i>P. gingivalis</i>:TNZT - HF</b>       | <b>-1,392</b> | <b>-2,373 to -0,4099</b>  | <b>Yes</b> | <b>****</b> | <b>&lt;0,0001</b> |
| <b><i>S. gordonii</i>:TNZT - HF vs. <i>P. gingivalis</i>:TNZT - HFAg</b>     | <b>-1,832</b> | <b>-2,813 to -0,8499</b>  | <b>Yes</b> | <b>****</b> | <b>&lt;0,0001</b> |
| <i>S. gordonii</i> :TNZT - HFAg vs. <i>S. sanguinis</i> :TAV - Control       | 0,3083        | -0,6734 to 1,290          | No         | ns          | >0,9999           |
| <i>S. gordonii</i> :TNZT - HFAg vs. <i>S. sanguinis</i> :TAV - CaP           | -0,08333      | -1,065 to 0,8984          | No         | ns          | >0,9999           |
| <i>S. gordonii</i> :TNZT - HFAg vs. <i>S. sanguinis</i> :TAV - CaPAg         | 0,09333       | -0,8884 to 1,075          | No         | ns          | >0,9999           |
| <i>S. gordonii</i> :TNZT - HFAg vs. <i>S. sanguinis</i> :TAV - HF            | -0,03833      | -1,020 to 0,9434          | No         | ns          | >0,9999           |
| <i>S. gordonii</i> :TNZT - HFAg vs. <i>S. sanguinis</i> :TAV - HFAg          | 0,2567        | -0,7251 to 1,238          | No         | ns          | >0,9999           |
| <i>S. gordonii</i> :TNZT - HFAg vs. <i>S. sanguinis</i> :TNZT - Control      | -0,2783       | -1,260 to 0,7034          | No         | ns          | >0,9999           |
| <i>S. gordonii</i> :TNZT - HFAg vs. <i>S. sanguinis</i> :TNZT - CaP          | -0,4550       | -1,437 to 0,5267          | No         | ns          | 0,9988            |
| <i>S. gordonii</i> :TNZT - HFAg vs. <i>S. sanguinis</i> :TNZT - CaPAg        | 0,1033        | -0,8784 to 1,085          | No         | ns          | >0,9999           |
| <i>S. gordonii</i> :TNZT - HFAg vs. <i>S. sanguinis</i> :TNZT - HF           | 0,09333       | -0,8884 to 1,075          | No         | ns          | >0,9999           |
| <i>S. gordonii</i> :TNZT - HFAg vs. <i>S. sanguinis</i> :TNZT - HFAg         | 0,6467        | -0,3351 to 1,628          | No         | ns          | 0,8243            |
| <i>S. gordonii</i> :TNZT - HFAg vs. <i>A. naeslundii</i> :TAV - Control      | -0,3783       | -1,360 to 0,6034          | No         | ns          | >0,9999           |
| <i>S. gordonii</i> :TNZT - HFAg vs. <i>A. naeslundii</i> :TAV - CaP          | -0,7733       | -1,755 to 0,2084          | No         | ns          | 0,4337            |
| <i>S. gordonii</i> :TNZT - HFAg vs. <i>A. naeslundii</i> :TAV - CaPAg        | -0,9200       | -1,902 to 0,06174         | No         | ns          | 0,1073            |
| <i>S. gordonii</i> :TNZT - HFAg vs. <i>A. naeslundii</i> :TAV - HF           | -0,2093       | -1,239 to 0,8203          | No         | ns          | >0,9999           |

|                                                                    |                |                            |            |             |                   |
|--------------------------------------------------------------------|----------------|----------------------------|------------|-------------|-------------------|
| S. gordonii:TNZT - HFAg vs. A. naeslundii:TAV - HFAg               | 0,000          | -0,9817 to 0,9817          | No         | ns          | >0,9999           |
| S. gordonii:TNZT - HFAg vs. A. naeslundii:TNZT - Control           | -0,9050        | -1,887 to 0,07674          | No         | ns          | 0,1274            |
| <b>S. gordonii:TNZT - HFAg vs. A. naeslundii:TNZT - CaP</b>        | <b>-1,075</b>  | <b>-2,057 to -0,09326</b>  | <b>Yes</b> | <b>*</b>    | <b>0,0134</b>     |
| S. gordonii:TNZT - HFAg vs. A. naeslundii:TNZT - CaPAg             | -0,7700        | -1,752 to 0,2117           | No         | ns          | 0,4442            |
| S. gordonii:TNZT - HFAg vs. A. naeslundii:TNZT - HF                | -0,2600        | -1,242 to 0,7217           | No         | ns          | >0,9999           |
| S. gordonii:TNZT - HFAg vs. A. naeslundii:TNZT - HFAg              | -0,5993        | -1,629 to 0,4303           | No         | ns          | 0,9539            |
| S. gordonii:TNZT - HFAg vs. P. gingivalis:TAV - Control            | -0,7500        | -1,732 to 0,2317           | No         | ns          | 0,5087            |
| <b>S. gordonii:TNZT - HFAg vs. P. gingivalis:TAV - CaP</b>         | <b>-1,388</b>  | <b>-2,370 to -0,4066</b>   | <b>Yes</b> | <b>****</b> | <b>&lt;0,0001</b> |
| <b>S. gordonii:TNZT - HFAg vs. P. gingivalis:TAV - CaPAg</b>       | <b>-1,785</b>  | <b>-2,767 to -0,8033</b>   | <b>Yes</b> | <b>****</b> | <b>&lt;0,0001</b> |
| <b>S. gordonii:TNZT - HFAg vs. P. gingivalis:TAV - HF</b>          | <b>-1,120</b>  | <b>-2,102 to -0,1383</b>   | <b>Yes</b> | <b>**</b>   | <b>0,0067</b>     |
| <b>S. gordonii:TNZT - HFAg vs. P. gingivalis:TAV - HFAg</b>        | <b>-1,105</b>  | <b>-2,087 to -0,1233</b>   | <b>Yes</b> | <b>**</b>   | <b>0,0085</b>     |
| S. gordonii:TNZT - HFAg vs. P. gingivalis:TNZT - Control           | -0,8593        | -1,889 to 0,1703           | No         | ns          | 0,3003            |
| <b>S. gordonii:TNZT - HFAg vs. P. gingivalis:TNZT - CaP</b>        | <b>-2,058</b>  | <b>-3,156 to -0,9607</b>   | <b>Yes</b> | <b>****</b> | <b>&lt;0,0001</b> |
| <b>S. gordonii:TNZT - HFAg vs. P. gingivalis:TNZT - CaPAg</b>      | <b>-2,042</b>  | <b>-3,023 to -1,060</b>    | <b>Yes</b> | <b>****</b> | <b>&lt;0,0001</b> |
| <b>S. gordonii:TNZT - HFAg vs. P. gingivalis:TNZT - HF</b>         | <b>-1,297</b>  | <b>-2,278 to -0,3149</b>   | <b>Yes</b> | <b>***</b>  | <b>0,0003</b>     |
| <b>S. gordonii:TNZT - HFAg vs. P. gingivalis:TNZT - HFAg</b>       | <b>-1,737</b>  | <b>-2,718 to -0,7549</b>   | <b>Yes</b> | <b>****</b> | <b>&lt;0,0001</b> |
| S. sanguinis:TAV - Control vs. S. sanguinis:TAV - CaP              | -0,3917        | -1,373 to 0,5901           | No         | ns          | >0,9999           |
| S. sanguinis:TAV - Control vs. S. sanguinis:TAV - CaPAg            | -0,2150        | -1,197 to 0,7667           | No         | ns          | >0,9999           |
| S. sanguinis:TAV - Control vs. S. sanguinis:TAV - HF               | -0,3467        | -1,328 to 0,6351           | No         | ns          | >0,9999           |
| S. sanguinis:TAV - Control vs. S. sanguinis:TAV - HFAg             | -0,05167       | -1,033 to 0,9301           | No         | ns          | >0,9999           |
| S. sanguinis:TAV - Control vs. S. sanguinis:TNZT - Control         | -0,5867        | -1,568 to 0,3951           | No         | ns          | 0,9364            |
| S. sanguinis:TAV - Control vs. S. sanguinis:TNZT - CaP             | -0,7633        | -1,745 to 0,2184           | No         | ns          | 0,4655            |
| S. sanguinis:TAV - Control vs. S. sanguinis:TNZT - CaPAg           | -0,2050        | -1,187 to 0,7767           | No         | ns          | >0,9999           |
| S. sanguinis:TAV - Control vs. S. sanguinis:TNZT - HF              | -0,2150        | -1,197 to 0,7667           | No         | ns          | >0,9999           |
| S. sanguinis:TAV - Control vs. S. sanguinis:TNZT - HFAg            | 0,3383         | -0,6434 to 1,320           | No         | ns          | >0,9999           |
| S. sanguinis:TAV - Control vs. A. naeslundii:TAV - Control         | -0,6867        | -1,668 to 0,2951           | No         | ns          | 0,7137            |
| <b>S. sanguinis:TAV - Control vs. A. naeslundii:TAV - CaP</b>      | <b>-1,082</b>  | <b>-2,063 to -0,09992</b>  | <b>Yes</b> | <b>*</b>    | <b>0,0121</b>     |
| <b>S. sanguinis:TAV - Control vs. A. naeslundii:TAV - CaPAg</b>    | <b>-1,228</b>  | <b>-2,210 to -0,2466</b>   | <b>Yes</b> | <b>**</b>   | <b>0,0011</b>     |
| S. sanguinis:TAV - Control vs. A. naeslundii:TAV - HF              | -0,5177        | -1,547 to 0,5120           | No         | ns          | 0,9948            |
| S. sanguinis:TAV - Control vs. A. naeslundii:TAV - HFAg            | -0,3083        | -1,290 to 0,6734           | No         | ns          | >0,9999           |
| <b>S. sanguinis:TAV - Control vs. A. naeslundii:TNZT - Control</b> | <b>-1,213</b>  | <b>-2,195 to -0,2316</b>   | <b>Yes</b> | <b>**</b>   | <b>0,0014</b>     |
| <b>S. sanguinis:TAV - Control vs. A. naeslundii:TNZT - CaP</b>     | <b>-1,383</b>  | <b>-2,365 to -0,4016</b>   | <b>Yes</b> | <b>****</b> | <b>&lt;0,0001</b> |
| <b>S. sanguinis:TAV - Control vs. A. naeslundii:TNZT - CaPAg</b>   | <b>-1,078</b>  | <b>-2,060 to -0,09659</b>  | <b>Yes</b> | <b>*</b>    | <b>0,0128</b>     |
| S. sanguinis:TAV - Control vs. A. naeslundii:TNZT - HF             | -0,5683        | -1,550 to 0,4134           | No         | ns          | 0,9570            |
| S. sanguinis:TAV - Control vs. A. naeslundii:TNZT - HFAg           | -0,9077        | -1,937 to 0,1220           | No         | ns          | 0,1944            |
| <b>S. sanguinis:TAV - Control vs. P. gingivalis:TAV - Control</b>  | <b>-1,058</b>  | <b>-2,040 to -0,07659</b>  | <b>Yes</b> | <b>*</b>    | <b>0,0172</b>     |
| <b>S. sanguinis:TAV - Control vs. P. gingivalis:TAV - CaP</b>      | <b>-1,697</b>  | <b>-2,678 to -0,7149</b>   | <b>Yes</b> | <b>****</b> | <b>&lt;0,0001</b> |
| <b>S. sanguinis:TAV - Control vs. P. gingivalis:TAV - CaPAg</b>    | <b>-2,093</b>  | <b>-3,075 to -1,112</b>    | <b>Yes</b> | <b>****</b> | <b>&lt;0,0001</b> |
| <b>S. sanguinis:TAV - Control vs. P. gingivalis:TAV - HF</b>       | <b>-1,428</b>  | <b>-2,410 to -0,4466</b>   | <b>Yes</b> | <b>****</b> | <b>&lt;0,0001</b> |
| <b>S. sanguinis:TAV - Control vs. P. gingivalis:TAV - HFAg</b>     | <b>-1,413</b>  | <b>-2,395 to -0,4316</b>   | <b>Yes</b> | <b>****</b> | <b>&lt;0,0001</b> |
| <b>S. sanguinis:TAV - Control vs. P. gingivalis:TNZT - Control</b> | <b>-1,168</b>  | <b>-2,197 to -0,1380</b>   | <b>Yes</b> | <b>**</b>   | <b>0,0075</b>     |
| <b>S. sanguinis:TAV - Control vs. P. gingivalis:TNZT - CaP</b>     | <b>-2,367</b>  | <b>-3,464 to -1,269</b>    | <b>Yes</b> | <b>****</b> | <b>&lt;0,0001</b> |
| <b>S. sanguinis:TAV - Control vs. P. gingivalis:TNZT - CaPAg</b>   | <b>-2,350</b>  | <b>-3,332 to -1,368</b>    | <b>Yes</b> | <b>****</b> | <b>&lt;0,0001</b> |
| <b>S. sanguinis:TAV - Control vs. P. gingivalis:TNZT - HF</b>      | <b>-1,605</b>  | <b>-2,587 to -0,6233</b>   | <b>Yes</b> | <b>****</b> | <b>&lt;0,0001</b> |
| <b>S. sanguinis:TAV - Control vs. P. gingivalis:TNZT - HFAg</b>    | <b>-2,045</b>  | <b>-3,027 to -1,063</b>    | <b>Yes</b> | <b>****</b> | <b>&lt;0,0001</b> |
| S. sanguinis:TAV - CaP vs. S. sanguinis:TAV - CaPAg                | 0,1767         | -0,8051 to 1,158           | No         | ns          | >0,9999           |
| S. sanguinis:TAV - CaP vs. S. sanguinis:TAV - HF                   | 0,04500        | -0,9367 to 1,027           | No         | ns          | >0,9999           |
| S. sanguinis:TAV - CaP vs. S. sanguinis:TAV - HFAg                 | 0,3400         | -0,6417 to 1,322           | No         | ns          | >0,9999           |
| S. sanguinis:TAV - CaP vs. S. sanguinis:TNZT - Control             | -0,1950        | -1,177 to 0,7867           | No         | ns          | >0,9999           |
| S. sanguinis:TAV - CaP vs. S. sanguinis:TNZT - CaP                 | -0,3717        | -1,353 to 0,6101           | No         | ns          | >0,9999           |
| S. sanguinis:TAV - CaP vs. S. sanguinis:TNZT - CaPAg               | 0,1867         | -0,7951 to 1,168           | No         | ns          | >0,9999           |
| S. sanguinis:TAV - CaP vs. S. sanguinis:TNZT - HF                  | 0,1767         | -0,8051 to 1,158           | No         | ns          | >0,9999           |
| S. sanguinis:TAV - CaP vs. S. sanguinis:TNZT - HFAg                | 0,7300         | -0,2517 to 1,712           | No         | ns          | 0,5747            |
| S. sanguinis:TAV - CaP vs. A. naeslundii:TAV - Control             | -0,2950        | -1,277 to 0,6867           | No         | ns          | >0,9999           |
| S. sanguinis:TAV - CaP vs. A. naeslundii:TAV - CaP                 | -0,6900        | -1,672 to 0,2917           | No         | ns          | 0,7035            |
| S. sanguinis:TAV - CaP vs. A. naeslundii:TAV - CaPAg               | -0,8367        | -1,818 to 0,1451           | No         | ns          | 0,2570            |
| S. sanguinis:TAV - CaP vs. A. naeslundii:TAV - HF                  | -0,1260        | -1,156 to 0,9037           | No         | ns          | >0,9999           |
| S. sanguinis:TAV - CaP vs. A. naeslundii:TAV - HFAg                | 0,08333        | -0,8984 to 1,065           | No         | ns          | >0,9999           |
| S. sanguinis:TAV - CaP vs. A. naeslundii:TNZT - Control            | -0,8217        | -1,803 to 0,1601           | No         | ns          | 0,2943            |
| <b>S. sanguinis:TAV - CaP vs. A. naeslundii:TNZT - CaP</b>         | <b>-0,9917</b> | <b>-1,973 to -0,009922</b> | <b>Yes</b> | <b>*</b>    | <b>0,0439</b>     |
| S. sanguinis:TAV - CaP vs. A. naeslundii:TNZT - CaPAg              | -0,6867        | -1,668 to 0,2951           | No         | ns          | 0,7137            |
| S. sanguinis:TAV - CaP vs. A. naeslundii:TNZT - HF                 | -0,1767        | -1,158 to 0,8051           | No         | ns          | >0,9999           |
| S. sanguinis:TAV - CaP vs. A. naeslundii:TNZT - HFAg               | -0,5160        | -1,546 to 0,5137           | No         | ns          | 0,9951            |
| S. sanguinis:TAV - CaP vs. P. gingivalis:TAV - Control             | -0,6667        | -1,648 to 0,3151           | No         | ns          | 0,7720            |
| <b>S. sanguinis:TAV - CaP vs. P. gingivalis:TAV - CaP</b>          | <b>-1,305</b>  | <b>-2,287 to -0,3233</b>   | <b>Yes</b> | <b>***</b>  | <b>0,0003</b>     |
| <b>S. sanguinis:TAV - CaP vs. P. gingivalis:TAV - CaPAg</b>        | <b>-1,702</b>  | <b>-2,683 to -0,7199</b>   | <b>Yes</b> | <b>****</b> | <b>&lt;0,0001</b> |
| <b>S. sanguinis:TAV - CaP vs. P. gingivalis:TAV - HF</b>           | <b>-1,037</b>  | <b>-2,018 to -0,05492</b>  | <b>Yes</b> | <b>*</b>    | <b>0,0236</b>     |
| <b>S. sanguinis:TAV - CaP vs. P. gingivalis:TAV - HFAg</b>         | <b>-1,022</b>  | <b>-2,003 to -0,03992</b>  | <b>Yes</b> | <b>*</b>    | <b>0,0291</b>     |
| S. sanguinis:TAV - CaP vs. P. gingivalis:TNZT - Control            | -0,7760        | -1,806 to 0,2537           | No         | ns          | 0,5420            |
| <b>S. sanguinis:TAV - CaP vs. P. gingivalis:TNZT - CaP</b>         | <b>-1,975</b>  | <b>-3,073 to -0,8774</b>   | <b>Yes</b> | <b>****</b> | <b>&lt;0,0001</b> |
| <b>S. sanguinis:TAV - CaP vs. P. gingivalis:TNZT - CaPAg</b>       | <b>-1,958</b>  | <b>-2,940 to -0,9766</b>   | <b>Yes</b> | <b>****</b> | <b>&lt;0,0001</b> |
| <b>S. sanguinis:TAV - CaP vs. P. gingivalis:TNZT - HF</b>          | <b>-1,213</b>  | <b>-2,195 to -0,2316</b>   | <b>Yes</b> | <b>**</b>   | <b>0,0014</b>     |

|                                                                  |                |                           |            |             |                   |
|------------------------------------------------------------------|----------------|---------------------------|------------|-------------|-------------------|
| <b>S. sanguinis:TAV - CaP vs. P. gingivalis:TNZT - HFAg</b>      | <b>-1,653</b>  | <b>-2,635 to -0,6716</b>  | <b>Yes</b> | <b>****</b> | <b>&lt;0,0001</b> |
| S. sanguinis:TAV - CaPAg vs. S. sanguinis:TAV - HF               | -0,1317        | -1,113 to 0,8501          | No         | ns          | >0,9999           |
| S. sanguinis:TAV - CaPAg vs. S. sanguinis:TAV - HFAg             | 0,1633         | -0,8184 to 1,145          | No         | ns          | >0,9999           |
| S. sanguinis:TAV - CaPAg vs. S. sanguinis:TNZT - Control         | -0,3717        | -1,353 to 0,6101          | No         | ns          | >0,9999           |
| S. sanguinis:TAV - CaPAg vs. S. sanguinis:TNZT - CaP             | -0,5483        | -1,530 to 0,4334          | No         | ns          | 0,9734            |
| S. sanguinis:TAV - CaPAg vs. S. sanguinis:TNZT - CaPAg           | 0,01000        | -0,9717 to 0,9917         | No         | ns          | >0,9999           |
| S. sanguinis:TAV - CaPAg vs. S. sanguinis:TNZT - HF              | 0,000          | -0,9817 to 0,9817         | No         | ns          | >0,9999           |
| S. sanguinis:TAV - CaPAg vs. S. sanguinis:TNZT - HFAg            | 0,5533         | -0,4284 to 1,535          | No         | ns          | 0,9698            |
| S. sanguinis:TAV - CaPAg vs. A. naeslundii:TAV - Control         | -0,4717        | -1,453 to 0,5101          | No         | ns          | 0,9977            |
| S. sanguinis:TAV - CaPAg vs. A. naeslundii:TAV - CaP             | -0,8667        | -1,848 to 0,1151          | No         | ns          | 0,1920            |
| <b>S. sanguinis:TAV - CaPAg vs. A. naeslundii:TAV - CaPAg</b>    | <b>-1,013</b>  | <b>-1,995 to -0,03159</b> | <b>Yes</b> | <b>*</b>    | <b>0,0327</b>     |
| S. sanguinis:TAV - CaPAg vs. A. naeslundii:TAV - HF              | -0,3027        | -1,332 to 0,7270          | No         | ns          | >0,9999           |
| S. sanguinis:TAV - CaPAg vs. A. naeslundii:TAV - HFAg            | -0,09333       | -1,075 to 0,8884          | No         | ns          | >0,9999           |
| <b>S. sanguinis:TAV - CaPAg vs. A. naeslundii:TNZT - Control</b> | <b>-0,9983</b> | <b>-1,980 to -0,01659</b> | <b>Yes</b> | <b>**</b>   | <b>0,0401</b>     |
| <b>S. sanguinis:TAV - CaPAg vs. A. naeslundii:TNZT - CaP</b>     | <b>-1,168</b>  | <b>-2,150 to -0,1866</b>  | <b>Yes</b> | <b>**</b>   | <b>0,0031</b>     |
| S. sanguinis:TAV - CaPAg vs. A. naeslundii:TNZT - CaPAg          | -0,8633        | -1,845 to 0,1184          | No         | ns          | 0,1986            |
| S. sanguinis:TAV - CaPAg vs. A. naeslundii:TNZT - HF             | -0,3533        | -1,335 to 0,6284          | No         | ns          | >0,9999           |
| S. sanguinis:TAV - CaPAg vs. A. naeslundii:TNZT - HFAg           | -0,6927        | -1,722 to 0,3370          | No         | ns          | 0,7890            |
| S. sanguinis:TAV - CaPAg vs. P. gingivalis:TAV - Control         | -0,8433        | -1,825 to 0,1384          | No         | ns          | 0,2414            |
| <b>S. sanguinis:TAV - CaPAg vs. P. gingivalis:TAV - CaP</b>      | <b>-1,482</b>  | <b>-2,463 to -0,4999</b>  | <b>Yes</b> | <b>****</b> | <b>&lt;0,0001</b> |
| <b>S. sanguinis:TAV - CaPAg vs. P. gingivalis:TAV - CaPAg</b>    | <b>-1,878</b>  | <b>-2,860 to -0,8966</b>  | <b>Yes</b> | <b>****</b> | <b>&lt;0,0001</b> |
| <b>S. sanguinis:TAV - CaPAg vs. P. gingivalis:TAV - HF</b>       | <b>-1,213</b>  | <b>-2,195 to -0,2316</b>  | <b>Yes</b> | <b>**</b>   | <b>0,0014</b>     |
| <b>S. sanguinis:TAV - CaPAg vs. P. gingivalis:TAV - HFAg</b>     | <b>-1,198</b>  | <b>-2,180 to -0,2166</b>  | <b>Yes</b> | <b>**</b>   | <b>0,0018</b>     |
| S. sanguinis:TAV - CaPAg vs. P. gingivalis:TNZT - Control        | -0,9527        | -1,982 to 0,07700         | No         | ns          | 0,1227            |
| <b>S. sanguinis:TAV - CaPAg vs. P. gingivalis:TNZT - CaP</b>     | <b>-2,152</b>  | <b>-3,249 to -1,054</b>   | <b>Yes</b> | <b>****</b> | <b>&lt;0,0001</b> |
| <b>S. sanguinis:TAV - CaPAg vs. P. gingivalis:TNZT - CaPAg</b>   | <b>-2,135</b>  | <b>-3,117 to -1,153</b>   | <b>Yes</b> | <b>****</b> | <b>&lt;0,0001</b> |
| <b>S. sanguinis:TAV - CaPAg vs. P. gingivalis:TNZT - HF</b>      | <b>-1,390</b>  | <b>-2,372 to -0,4083</b>  | <b>Yes</b> | <b>****</b> | <b>&lt;0,0001</b> |
| <b>S. sanguinis:TAV - CaPAg vs. P. gingivalis:TNZT - HFAg</b>    | <b>-1,830</b>  | <b>-2,812 to -0,8483</b>  | <b>Yes</b> | <b>****</b> | <b>&lt;0,0001</b> |
| S. sanguinis:TAV - HF vs. S. sanguinis:TAV - HFAg                | 0,2950         | -0,6867 to 1,277          | No         | ns          | >0,9999           |
| S. sanguinis:TAV - HF vs. S. sanguinis:TNZT - Control            | -0,2400        | -1,222 to 0,7417          | No         | ns          | >0,9999           |
| S. sanguinis:TAV - HF vs. S. sanguinis:TNZT - CaP                | -0,4167        | -1,398 to 0,5651          | No         | ns          | 0,9998            |
| S. sanguinis:TAV - HF vs. S. sanguinis:TNZT - CaPAg              | 0,1417         | -0,8401 to 1,123          | No         | ns          | >0,9999           |
| S. sanguinis:TAV - HF vs. S. sanguinis:TNZT - HF                 | 0,1317         | -0,8501 to 1,113          | No         | ns          | >0,9999           |
| S. sanguinis:TAV - HF vs. S. sanguinis:TNZT - HFAg               | 0,6850         | -0,2967 to 1,667          | No         | ns          | 0,7188            |
| S. sanguinis:TAV - HF vs. A. naeslundii:TAV - Control            | -0,3400        | -1,322 to 0,6417          | No         | ns          | >0,9999           |
| S. sanguinis:TAV - HF vs. A. naeslundii:TAV - CaP                | -0,7350        | -1,717 to 0,2467          | No         | ns          | 0,5581            |
| S. sanguinis:TAV - HF vs. A. naeslundii:TAV - CaPAg              | -0,8817        | -1,863 to 0,1001          | No         | ns          | 0,1643            |
| S. sanguinis:TAV - HF vs. A. naeslundii:TAV - HF                 | -0,1710        | -1,201 to 0,8587          | No         | ns          | >0,9999           |
| S. sanguinis:TAV - HF vs. A. naeslundii:TAV - HFAg               | 0,03833        | -0,9434 to 1,020          | No         | ns          | >0,9999           |
| S. sanguinis:TAV - HF vs. A. naeslundii:TNZT - Control           | -0,8667        | -1,848 to 0,1151          | No         | ns          | 0,1920            |
| <b>S. sanguinis:TAV - HF vs. A. naeslundii:TNZT - CaP</b>        | <b>-1,037</b>  | <b>-2,018 to -0,05492</b> | <b>Yes</b> | <b>*</b>    | <b>0,0236</b>     |
| S. sanguinis:TAV - HF vs. A. naeslundii:TNZT - CaPAg             | -0,7317        | -1,713 to 0,2501          | No         | ns          | 0,5692            |
| S. sanguinis:TAV - HF vs. A. naeslundii:TNZT - HF                | -0,2217        | -1,203 to 0,7601          | No         | ns          | >0,9999           |
| S. sanguinis:TAV - HF vs. A. naeslundii:TNZT - HFAg              | -0,5610        | -1,591 to 0,4687          | No         | ns          | 0,9813            |
| S. sanguinis:TAV - HF vs. P. gingivalis:TAV - Control            | -0,7117        | -1,693 to 0,2701          | No         | ns          | 0,6348            |
| <b>S. sanguinis:TAV - HF vs. P. gingivalis:TAV - CaP</b>         | <b>-1,350</b>  | <b>-2,332 to -0,3683</b>  | <b>Yes</b> | <b>***</b>  | <b>0,0001</b>     |
| <b>S. sanguinis:TAV - HF vs. P. gingivalis:TAV - CaPAg</b>       | <b>-1,747</b>  | <b>-2,728 to -0,7649</b>  | <b>Yes</b> | <b>****</b> | <b>&lt;0,0001</b> |
| <b>S. sanguinis:TAV - HF vs. P. gingivalis:TAV - HF</b>          | <b>-1,082</b>  | <b>-2,063 to -0,09992</b> | <b>Yes</b> | <b>*</b>    | <b>0,0121</b>     |
| <b>S. sanguinis:TAV - HF vs. P. gingivalis:TAV - HFAg</b>        | <b>-1,067</b>  | <b>-2,048 to -0,08492</b> | <b>Yes</b> | <b>*</b>    | <b>0,0152</b>     |
| S. sanguinis:TAV - HF vs. P. gingivalis:TNZT - Control           | -0,8210        | -1,851 to 0,2087          | No         | ns          | 0,4044            |
| <b>S. sanguinis:TAV - HF vs. P. gingivalis:TNZT - CaP</b>        | <b>-2,020</b>  | <b>-3,118 to -0,9224</b>  | <b>Yes</b> | <b>****</b> | <b>&lt;0,0001</b> |
| <b>S. sanguinis:TAV - HF vs. P. gingivalis:TNZT - CaPAg</b>      | <b>-2,003</b>  | <b>-2,985 to -1,022</b>   | <b>Yes</b> | <b>****</b> | <b>&lt;0,0001</b> |
| <b>S. sanguinis:TAV - HF vs. P. gingivalis:TNZT - HF</b>         | <b>-1,258</b>  | <b>-2,240 to -0,2766</b>  | <b>Yes</b> | <b>***</b>  | <b>0,0006</b>     |
| <b>S. sanguinis:TAV - HF vs. P. gingivalis:TNZT - HFAg</b>       | <b>-1,698</b>  | <b>-2,680 to -0,7166</b>  | <b>Yes</b> | <b>****</b> | <b>&lt;0,0001</b> |
| S. sanguinis:TAV - HFAg vs. S. sanguinis:TNZT - Control          | -0,5350        | -1,517 to 0,4467          | No         | ns          | 0,9813            |
| S. sanguinis:TAV - HFAg vs. S. sanguinis:TNZT - CaP              | -0,7117        | -1,693 to 0,2701          | No         | ns          | 0,6348            |
| S. sanguinis:TAV - HFAg vs. S. sanguinis:TNZT - CaPAg            | -0,1533        | -1,135 to 0,8284          | No         | ns          | >0,9999           |
| S. sanguinis:TAV - HFAg vs. S. sanguinis:TNZT - HF               | -0,1633        | -1,145 to 0,8184          | No         | ns          | >0,9999           |
| S. sanguinis:TAV - HFAg vs. S. sanguinis:TNZT - HFAg             | 0,3900         | -0,5917 to 1,372          | No         | ns          | >0,9999           |
| S. sanguinis:TAV - HFAg vs. A. naeslundii:TAV - Control          | -0,6350        | -1,617 to 0,3467          | No         | ns          | 0,8516            |
| <b>S. sanguinis:TAV - HFAg vs. A. naeslundii:TAV - CaP</b>       | <b>-1,030</b>  | <b>-2,012 to -0,04826</b> | <b>Yes</b> | <b>*</b>    | <b>0,0259</b>     |
| <b>S. sanguinis:TAV - HFAg vs. A. naeslundii:TAV - CaPAg</b>     | <b>-1,177</b>  | <b>-2,158 to -0,1949</b>  | <b>Yes</b> | <b>**</b>   | <b>0,0027</b>     |
| S. sanguinis:TAV - HFAg vs. A. naeslundii:TAV - HF               | -0,4660        | -1,496 to 0,5637          | No         | ns          | 0,9993            |
| S. sanguinis:TAV - HFAg vs. A. naeslundii:TAV - HFAg             | -0,2567        | -1,238 to 0,7251          | No         | ns          | >0,9999           |
| <b>S. sanguinis:TAV - HFAg vs. A. naeslundii:TNZT - Control</b>  | <b>-1,162</b>  | <b>-2,143 to -0,1799</b>  | <b>Yes</b> | <b>**</b>   | <b>0,0034</b>     |
| <b>S. sanguinis:TAV - HFAg vs. A. naeslundii:TNZT - CaP</b>      | <b>-1,332</b>  | <b>-2,313 to -0,3499</b>  | <b>Yes</b> | <b>***</b>  | <b>0,0002</b>     |
| <b>S. sanguinis:TAV - HFAg vs. A. naeslundii:TNZT - CaPAg</b>    | <b>-1,027</b>  | <b>-2,008 to -0,04492</b> | <b>Yes</b> | <b>*</b>    | <b>0,0271</b>     |
| S. sanguinis:TAV - HFAg vs. A. naeslundii:TNZT - HF              | -0,5167        | -1,498 to 0,4651          | No         | ns          | 0,9890            |
| S. sanguinis:TAV - HFAg vs. A. naeslundii:TNZT - HFAg            | -0,8560        | -1,886 to 0,1737          | No         | ns          | 0,3087            |
| <b>S. sanguinis:TAV - HFAg vs. P. gingivalis:TAV - Control</b>   | <b>-1,007</b>  | <b>-1,988 to -0,02492</b> | <b>Yes</b> | <b>*</b>    | <b>0,0358</b>     |
| <b>S. sanguinis:TAV - HFAg vs. P. gingivalis:TAV - CaP</b>       | <b>-1,645</b>  | <b>-2,627 to -0,6633</b>  | <b>Yes</b> | <b>****</b> | <b>&lt;0,0001</b> |
| <b>S. sanguinis:TAV - HFAg vs. P. gingivalis:TAV - CaPAg</b>     | <b>-2,042</b>  | <b>-3,023 to -1,060</b>   | <b>Yes</b> | <b>****</b> | <b>&lt;0,0001</b> |

|                                                                   |               |                           |            |             |                   |
|-------------------------------------------------------------------|---------------|---------------------------|------------|-------------|-------------------|
| <b>S. sanguinis:TAV - HFAg vs. P. gingivalis:TAV - HF</b>         | <b>-1,377</b> | <b>-2,358 to -0,3949</b>  | <b>Yes</b> | <b>****</b> | <b>&lt;0,0001</b> |
| <b>S. sanguinis:TAV - HFAg vs. P. gingivalis:TAV - HFAg</b>       | <b>-1,362</b> | <b>-2,343 to -0,3799</b>  | <b>Yes</b> | <b>****</b> | <b>&lt;0,0001</b> |
| <b>S. sanguinis:TAV - HFAg vs. P. gingivalis:TNZT - Control</b>   | <b>-1,116</b> | <b>-2,146 to -0,08634</b> | <b>Yes</b> | <b>*</b>    | <b>0,0158</b>     |
| <b>S. sanguinis:TAV - HFAg vs. P. gingivalis:TNZT - CaP</b>       | <b>-2,315</b> | <b>-3,413 to -1,217</b>   | <b>Yes</b> | <b>****</b> | <b>&lt;0,0001</b> |
| <b>S. sanguinis:TAV - HFAg vs. P. gingivalis:TNZT - CaPAg</b>     | <b>-2,298</b> | <b>-3,280 to -1,317</b>   | <b>Yes</b> | <b>****</b> | <b>&lt;0,0001</b> |
| <b>S. sanguinis:TAV - HFAg vs. P. gingivalis:TNZT - HF</b>        | <b>-1,553</b> | <b>-2,535 to -0,5716</b>  | <b>Yes</b> | <b>****</b> | <b>&lt;0,0001</b> |
| <b>S. sanguinis:TAV - HFAg vs. P. gingivalis:TNZT - HFAg</b>      | <b>-1,993</b> | <b>-2,975 to -1,012</b>   | <b>Yes</b> | <b>****</b> | <b>&lt;0,0001</b> |
| S. sanguinis:TNZT - Control vs. S. sanguinis:TNZT - CaP           | -0,1767       | -1,158 to 0,8051          | No         | ns          | >0,9999           |
| S. sanguinis:TNZT - Control vs. S. sanguinis:TNZT - CaPAg         | 0,3817        | -0,6001 to 1,363          | No         | ns          | >0,9999           |
| S. sanguinis:TNZT - Control vs. S. sanguinis:TNZT - HF            | 0,3717        | -0,6101 to 1,353          | No         | ns          | >0,9999           |
| S. sanguinis:TNZT - Control vs. S. sanguinis:TNZT - HFAg          | 0,9250        | -0,05674 to 1,907         | No         | ns          | 0,1013            |
| S. sanguinis:TNZT - Control vs. A. naeslundii:TAV - Control       | -0,1000       | -1,082 to 0,8817          | No         | ns          | >0,9999           |
| S. sanguinis:TNZT - Control vs. A. naeslundii:TAV - CaP           | -0,4950       | -1,477 to 0,4867          | No         | ns          | 0,9945            |
| S. sanguinis:TNZT - Control vs. A. naeslundii:TAV - CaPAg         | -0,6417       | -1,623 to 0,3401          | No         | ns          | 0,8363            |
| S. sanguinis:TNZT - Control vs. A. naeslundii:TAV - HF            | 0,06900       | -0,9607 to 1,099          | No         | ns          | >0,9999           |
| S. sanguinis:TNZT - Control vs. A. naeslundii:TAV - HFAg          | 0,2783        | -0,7034 to 1,260          | No         | ns          | >0,9999           |
| S. sanguinis:TNZT - Control vs. A. naeslundii:TNZT - Control      | -0,6267       | -1,608 to 0,3551          | No         | ns          | 0,8694            |
| S. sanguinis:TNZT - Control vs. A. naeslundii:TNZT - CaP          | -0,7967       | -1,778 to 0,1851          | No         | ns          | 0,3631            |
| S. sanguinis:TNZT - Control vs. A. naeslundii:TNZT - CaPAg        | -0,4917       | -1,473 to 0,4901          | No         | ns          | 0,9951            |
| S. sanguinis:TNZT - Control vs. A. naeslundii:TNZT - HF           | 0,01833       | -0,9634 to 1,000          | No         | ns          | >0,9999           |
| S. sanguinis:TNZT - Control vs. A. naeslundii:TNZT - HFAg         | -0,3210       | -1,351 to 0,7087          | No         | ns          | >0,9999           |
| S. sanguinis:TNZT - Control vs. P. gingivalis:TAV - Control       | -0,4717       | -1,453 to 0,5101          | No         | ns          | 0,9977            |
| <b>S. sanguinis:TNZT - Control vs. P. gingivalis:TAV - CaP</b>    | <b>-1,110</b> | <b>-2,092 to -0,1283</b>  | <b>Yes</b> | <b>**</b>   | <b>0,0079</b>     |
| <b>S. sanguinis:TNZT - Control vs. P. gingivalis:TAV - CaPAg</b>  | <b>-1,507</b> | <b>-2,488 to -0,5249</b>  | <b>Yes</b> | <b>****</b> | <b>&lt;0,0001</b> |
| S. sanguinis:TNZT - Control vs. P. gingivalis:TAV - HF            | -0,8417       | -1,823 to 0,1401          | No         | ns          | 0,2452            |
| S. sanguinis:TNZT - Control vs. P. gingivalis:TAV - HFAg          | -0,8267       | -1,808 to 0,1551          | No         | ns          | 0,2815            |
| S. sanguinis:TNZT - Control vs. P. gingivalis:TNZT - Control      | -0,5810       | -1,611 to 0,4487          | No         | ns          | 0,9694            |
| <b>S. sanguinis:TNZT - Control vs. P. gingivalis:TNZT - CaP</b>   | <b>-1,780</b> | <b>-2,878 to -0,6824</b>  | <b>Yes</b> | <b>****</b> | <b>&lt;0,0001</b> |
| <b>S. sanguinis:TNZT - Control vs. P. gingivalis:TNZT - CaPAg</b> | <b>-1,763</b> | <b>-2,745 to -0,7816</b>  | <b>Yes</b> | <b>****</b> | <b>&lt;0,0001</b> |
| <b>S. sanguinis:TNZT - Control vs. P. gingivalis:TNZT - HF</b>    | <b>-1,018</b> | <b>-2,000 to -0,03659</b> | <b>Yes</b> | <b>*</b>    | <b>0,0305</b>     |
| <b>S. sanguinis:TNZT - Control vs. P. gingivalis:TNZT - HFAg</b>  | <b>-1,458</b> | <b>-2,440 to -0,4766</b>  | <b>Yes</b> | <b>****</b> | <b>&lt;0,0001</b> |
| S. sanguinis:TNZT - CaP vs. S. sanguinis:TNZT - CaPAg             | 0,5583        | -0,4234 to 1,540          | No         | ns          | 0,9659            |
| S. sanguinis:TNZT - CaP vs. S. sanguinis:TNZT - HF                | 0,5483        | -0,4334 to 1,530          | No         | ns          | 0,9734            |
| <b>S. sanguinis:TNZT - CaP vs. S. sanguinis:TNZT - HFAg</b>       | <b>1,102</b>  | <b>0,1199 to 2,083</b>    | <b>Yes</b> | <b>**</b>   | <b>0,0089</b>     |
| S. sanguinis:TNZT - CaP vs. A. naeslundii:TAV - Control           | 0,07667       | -0,9051 to 1,058          | No         | ns          | >0,9999           |
| S. sanguinis:TNZT - CaP vs. A. naeslundii:TAV - CaP               | -0,3183       | -1,300 to 0,6634          | No         | ns          | >0,9999           |
| S. sanguinis:TNZT - CaP vs. A. naeslundii:TAV - CaPAg             | -0,4650       | -1,447 to 0,5167          | No         | ns          | 0,9982            |
| S. sanguinis:TNZT - CaP vs. A. naeslundii:TAV - HF                | 0,2457        | -0,7840 to 1,275          | No         | ns          | >0,9999           |
| S. sanguinis:TNZT - CaP vs. A. naeslundii:TAV - HFAg              | 0,4550        | -0,5267 to 1,437          | No         | ns          | 0,9988            |
| S. sanguinis:TNZT - CaP vs. A. naeslundii:TNZT - Control          | -0,4500       | -1,432 to 0,5317          | No         | ns          | 0,9990            |
| S. sanguinis:TNZT - CaP vs. A. naeslundii:TNZT - CaP              | -0,6200       | -1,602 to 0,3617          | No         | ns          | 0,8828            |
| S. sanguinis:TNZT - CaP vs. A. naeslundii:TNZT - CaPAg            | -0,3150       | -1,297 to 0,6667          | No         | ns          | >0,9999           |
| S. sanguinis:TNZT - CaP vs. A. naeslundii:TNZT - HF               | 0,1950        | -0,7867 to 1,177          | No         | ns          | >0,9999           |
| S. sanguinis:TNZT - CaP vs. A. naeslundii:TNZT - HFAg             | -0,1443       | -1,174 to 0,8853          | No         | ns          | >0,9999           |
| S. sanguinis:TNZT - CaP vs. P. gingivalis:TAV - Control           | -0,2950       | -1,277 to 0,6867          | No         | ns          | >0,9999           |
| S. sanguinis:TNZT - CaP vs. P. gingivalis:TAV - CaP               | -0,9333       | -1,915 to 0,04841         | No         | ns          | 0,0917            |
| <b>S. sanguinis:TNZT - CaP vs. P. gingivalis:TAV - CaPAg</b>      | <b>-1,330</b> | <b>-2,312 to -0,3483</b>  | <b>Yes</b> | <b>***</b>  | <b>0,0002</b>     |
| S. sanguinis:TNZT - CaP vs. P. gingivalis:TAV - HF                | -0,6650       | -1,647 to 0,3167          | No         | ns          | 0,7766            |
| S. sanguinis:TNZT - CaP vs. P. gingivalis:TAV - HFAg              | -0,6500       | -1,632 to 0,3317          | No         | ns          | 0,8161            |
| S. sanguinis:TNZT - CaP vs. P. gingivalis:TNZT - Control          | -0,4043       | -1,434 to 0,6253          | No         | ns          | >0,9999           |
| <b>S. sanguinis:TNZT - CaP vs. P. gingivalis:TNZT - CaP</b>       | <b>-1,603</b> | <b>-2,701 to -0,5057</b>  | <b>Yes</b> | <b>****</b> | <b>&lt;0,0001</b> |
| <b>S. sanguinis:TNZT - CaP vs. P. gingivalis:TNZT - CaPAg</b>     | <b>-1,587</b> | <b>-2,568 to -0,6049</b>  | <b>Yes</b> | <b>****</b> | <b>&lt;0,0001</b> |
| S. sanguinis:TNZT - CaP vs. P. gingivalis:TNZT - HF               | -0,8417       | -1,823 to 0,1401          | No         | ns          | 0,2452            |
| <b>S. sanguinis:TNZT - CaP vs. P. gingivalis:TNZT - HFAg</b>      | <b>-1,282</b> | <b>-2,263 to -0,2999</b>  | <b>Yes</b> | <b>***</b>  | <b>0,0004</b>     |
| S. sanguinis:TNZT - CaPAg vs. S. sanguinis:TNZT - HF              | -0,01000      | -0,9917 to 0,9717         | No         | ns          | >0,9999           |
| S. sanguinis:TNZT - CaPAg vs. S. sanguinis:TNZT - HFAg            | 0,5433        | -0,4384 to 1,525          | No         | ns          | 0,9766            |
| S. sanguinis:TNZT - CaPAg vs. A. naeslundii:TAV - Control         | -0,4817       | -1,463 to 0,5001          | No         | ns          | 0,9966            |
| S. sanguinis:TNZT - CaPAg vs. A. naeslundii:TAV - CaP             | -0,8767       | -1,858 to 0,1051          | No         | ns          | 0,1732            |
| <b>S. sanguinis:TNZT - CaPAg vs. A. naeslundii:TAV - CaPAg</b>    | <b>-1,023</b> | <b>-2,005 to -0,04159</b> | <b>Yes</b> | <b>*</b>    | <b>0,0284</b>     |
| S. sanguinis:TNZT - CaPAg vs. A. naeslundii:TAV - HF              | -0,3127       | -1,342 to 0,7170          | No         | ns          | >0,9999           |
| S. sanguinis:TNZT - CaPAg vs. A. naeslundii:TAV - HFAg            | -0,1033       | -1,085 to 0,8784          | No         | ns          | >0,9999           |
| <b>S. sanguinis:TNZT - CaPAg vs. A. naeslundii:TNZT - Control</b> | <b>-1,008</b> | <b>-1,990 to -0,02659</b> | <b>Yes</b> | <b>*</b>    | <b>0,0350</b>     |
| <b>S. sanguinis:TNZT - CaPAg vs. A. naeslundii:TNZT - CaP</b>     | <b>-1,178</b> | <b>-2,160 to -0,1966</b>  | <b>Yes</b> | <b>**</b>   | <b>0,0026</b>     |
| S. sanguinis:TNZT - CaPAg vs. A. naeslundii:TNZT - CaPAg          | -0,8733       | -1,855 to 0,1084          | No         | ns          | 0,1793            |
| S. sanguinis:TNZT - CaPAg vs. A. naeslundii:TNZT - HF             | -0,3633       | -1,345 to 0,6184          | No         | ns          | >0,9999           |
| S. sanguinis:TNZT - CaPAg vs. A. naeslundii:TNZT - HFAg           | -0,7027       | -1,732 to 0,3270          | No         | ns          | 0,7628            |
| S. sanguinis:TNZT - CaPAg vs. P. gingivalis:TAV - Control         | -0,8533       | -1,835 to 0,1284          | No         | ns          | 0,2193            |
| <b>S. sanguinis:TNZT - CaPAg vs. P. gingivalis:TAV - CaP</b>      | <b>-1,492</b> | <b>-2,473 to -0,5099</b>  | <b>Yes</b> | <b>****</b> | <b>&lt;0,0001</b> |
| <b>S. sanguinis:TNZT - CaPAg vs. P. gingivalis:TAV - CaPAg</b>    | <b>-1,888</b> | <b>-2,870 to -0,9066</b>  | <b>Yes</b> | <b>****</b> | <b>&lt;0,0001</b> |
| <b>S. sanguinis:TNZT - CaPAg vs. P. gingivalis:TAV - HF</b>       | <b>-1,223</b> | <b>-2,205 to -0,2416</b>  | <b>Yes</b> | <b>**</b>   | <b>0,0012</b>     |
| <b>S. sanguinis:TNZT - CaPAg vs. P. gingivalis:TAV - HFAg</b>     | <b>-1,208</b> | <b>-2,190 to -0,2266</b>  | <b>Yes</b> | <b>**</b>   | <b>0,0016</b>     |
| S. sanguinis:TNZT - CaPAg vs. P. gingivalis:TNZT - Control        | -0,9627       | -1,992 to 0,06700         | No         | ns          | 0,1100            |

|                                                                   |                |                           |            |             |                   |
|-------------------------------------------------------------------|----------------|---------------------------|------------|-------------|-------------------|
| <b>S. sanguinis:TNZT - CaPAg vs. P. gingivalis:TNZT - CaP</b>     | <b>-2,162</b>  | <b>-3,259 to -1,064</b>   | <b>Yes</b> | <b>****</b> | <b>&lt;0,0001</b> |
| <b>S. sanguinis:TNZT - CaPAg vs. P. gingivalis:TNZT - CaPAg</b>   | <b>-2,145</b>  | <b>-3,127 to -1,163</b>   | <b>Yes</b> | <b>****</b> | <b>&lt;0,0001</b> |
| <b>S. sanguinis:TNZT - CaPAg vs. P. gingivalis:TNZT - HF</b>      | <b>-1,400</b>  | <b>-2,382 to -0,4183</b>  | <b>Yes</b> | <b>****</b> | <b>&lt;0,0001</b> |
| <b>S. sanguinis:TNZT - CaPAg vs. P. gingivalis:TNZT - HFAG</b>    | <b>-1,840</b>  | <b>-2,822 to -0,8583</b>  | <b>Yes</b> | <b>****</b> | <b>&lt;0,0001</b> |
| S. sanguinis:TNZT - HF vs. S. sanguinis:TNZT - HFAG               | 0,5533         | -0,4284 to 1,535          | No         | ns          | 0,9698            |
| S. sanguinis:TNZT - HF vs. A. naeslundii:TAV - Control            | -0,4717        | -1,453 to 0,5101          | No         | ns          | 0,9977            |
| S. sanguinis:TNZT - HF vs. A. naeslundii:TAV - CaP                | -0,8667        | -1,848 to 0,1151          | No         | ns          | 0,1920            |
| <b>S. sanguinis:TNZT - HF vs. A. naeslundii:TAV - CaPAg</b>       | <b>-1,013</b>  | <b>-1,995 to -0,03159</b> | <b>Yes</b> | <b>*</b>    | <b>0,0327</b>     |
| S. sanguinis:TNZT - HF vs. A. naeslundii:TAV - HF                 | -0,3027        | -1,332 to 0,7270          | No         | ns          | >0,9999           |
| S. sanguinis:TNZT - HF vs. A. naeslundii:TAV - HFAG               | -0,09333       | -1,075 to 0,8884          | No         | ns          | >0,9999           |
| <b>S. sanguinis:TNZT - HF vs. A. naeslundii:TNZT - Control</b>    | <b>-0,9983</b> | <b>-1,980 to -0,01659</b> | <b>Yes</b> | <b>*</b>    | <b>0,0401</b>     |
| <b>S. sanguinis:TNZT - HF vs. A. naeslundii:TNZT - CaP</b>        | <b>-1,168</b>  | <b>-2,150 to -0,1866</b>  | <b>Yes</b> | <b>**</b>   | <b>0,0031</b>     |
| S. sanguinis:TNZT - HF vs. A. naeslundii:TNZT - CaPAg             | -0,8633        | -1,845 to 0,1184          | No         | ns          | 0,1986            |
| S. sanguinis:TNZT - HF vs. A. naeslundii:TNZT - HF                | -0,3533        | -1,335 to 0,6284          | No         | ns          | >0,9999           |
| S. sanguinis:TNZT - HF vs. A. naeslundii:TNZT - HFAG              | -0,6927        | -1,722 to 0,3370          | No         | ns          | 0,7890            |
| S. sanguinis:TNZT - HF vs. P. gingivalis:TAV - Control            | -0,8433        | -1,825 to 0,1384          | No         | ns          | 0,2414            |
| <b>S. sanguinis:TNZT - HF vs. P. gingivalis:TAV - CaP</b>         | <b>-1,482</b>  | <b>-2,463 to -0,4999</b>  | <b>Yes</b> | <b>****</b> | <b>&lt;0,0001</b> |
| <b>S. sanguinis:TNZT - HF vs. P. gingivalis:TAV - CaPAg</b>       | <b>-1,878</b>  | <b>-2,860 to -0,8966</b>  | <b>Yes</b> | <b>****</b> | <b>&lt;0,0001</b> |
| <b>S. sanguinis:TNZT - HF vs. P. gingivalis:TAV - HF</b>          | <b>-1,213</b>  | <b>-2,195 to -0,2316</b>  | <b>Yes</b> | <b>**</b>   | <b>0,0014</b>     |
| <b>S. sanguinis:TNZT - HF vs. P. gingivalis:TAV - HFAG</b>        | <b>-1,198</b>  | <b>-2,180 to -0,2166</b>  | <b>Yes</b> | <b>**</b>   | <b>0,0018</b>     |
| S. sanguinis:TNZT - HF vs. P. gingivalis:TNZT - Control           | -0,9527        | -1,982 to 0,07700         | No         | ns          | 0,1227            |
| <b>S. sanguinis:TNZT - HF vs. P. gingivalis:TNZT - CaP</b>        | <b>-2,152</b>  | <b>-3,249 to -1,054</b>   | <b>Yes</b> | <b>****</b> | <b>&lt;0,0001</b> |
| <b>S. sanguinis:TNZT - HF vs. P. gingivalis:TNZT - CaPAg</b>      | <b>-2,135</b>  | <b>-3,117 to -1,153</b>   | <b>Yes</b> | <b>****</b> | <b>&lt;0,0001</b> |
| <b>S. sanguinis:TNZT - HF vs. P. gingivalis:TNZT - HF</b>         | <b>-1,390</b>  | <b>-2,372 to -0,4083</b>  | <b>Yes</b> | <b>****</b> | <b>&lt;0,0001</b> |
| <b>S. sanguinis:TNZT - HF vs. P. gingivalis:TNZT - HFAG</b>       | <b>-1,830</b>  | <b>-2,812 to -0,8483</b>  | <b>Yes</b> | <b>****</b> | <b>&lt;0,0001</b> |
| <b>S. sanguinis:TNZT - HFAG vs. A. naeslundii:TAV - Control</b>   | <b>-1,025</b>  | <b>-2,007 to -0,04326</b> | <b>Yes</b> | <b>*</b>    | <b>0,0278</b>     |
| <b>S. sanguinis:TNZT - HFAG vs. A. naeslundii:TAV - CaP</b>       | <b>-1,420</b>  | <b>-2,402 to -0,4383</b>  | <b>Yes</b> | <b>****</b> | <b>&lt;0,0001</b> |
| <b>S. sanguinis:TNZT - HFAG vs. A. naeslundii:TAV - CaPAg</b>     | <b>-1,567</b>  | <b>-2,548 to -0,5849</b>  | <b>Yes</b> | <b>****</b> | <b>&lt;0,0001</b> |
| S. sanguinis:TNZT - HFAG vs. A. naeslundii:TAV - HF               | -0,8560        | -1,886 to 0,1737          | No         | ns          | 0,3087            |
| S. sanguinis:TNZT - HFAG vs. A. naeslundii:TAV - HFAG             | -0,6467        | -1,628 to 0,3351          | No         | ns          | 0,8243            |
| <b>S. sanguinis:TNZT - HFAG vs. A. naeslundii:TNZT - Control</b>  | <b>-1,552</b>  | <b>-2,533 to -0,5699</b>  | <b>Yes</b> | <b>****</b> | <b>&lt;0,0001</b> |
| <b>S. sanguinis:TNZT - HFAG vs. A. naeslundii:TNZT - CaP</b>      | <b>-1,722</b>  | <b>-2,703 to -0,7399</b>  | <b>Yes</b> | <b>****</b> | <b>&lt;0,0001</b> |
| <b>S. sanguinis:TNZT - HFAG vs. A. naeslundii:TNZT - CaPAg</b>    | <b>-1,417</b>  | <b>-2,398 to -0,4349</b>  | <b>Yes</b> | <b>****</b> | <b>&lt;0,0001</b> |
| S. sanguinis:TNZT - HFAG vs. A. naeslundii:TNZT - HF              | -0,9067        | -1,888 to 0,07508         | No         | ns          | 0,1250            |
| <b>S. sanguinis:TNZT - HFAG vs. A. naeslundii:TNZT - HFAG</b>     | <b>-1,246</b>  | <b>-2,276 to -0,2163</b>  | <b>Yes</b> | <b>**</b>   | <b>0,0022</b>     |
| <b>S. sanguinis:TNZT - HFAG vs. P. gingivalis:TAV - Control</b>   | <b>-1,397</b>  | <b>-2,378 to -0,4149</b>  | <b>Yes</b> | <b>****</b> | <b>&lt;0,0001</b> |
| <b>S. sanguinis:TNZT - HFAG vs. P. gingivalis:TAV - CaP</b>       | <b>-2,035</b>  | <b>-3,017 to -1,053</b>   | <b>Yes</b> | <b>****</b> | <b>&lt;0,0001</b> |
| <b>S. sanguinis:TNZT - HFAG vs. P. gingivalis:TAV - CaPAg</b>     | <b>-2,432</b>  | <b>-3,413 to -1,450</b>   | <b>Yes</b> | <b>****</b> | <b>&lt;0,0001</b> |
| <b>S. sanguinis:TNZT - HFAG vs. P. gingivalis:TAV - HF</b>        | <b>-1,767</b>  | <b>-2,748 to -0,7849</b>  | <b>Yes</b> | <b>****</b> | <b>&lt;0,0001</b> |
| <b>S. sanguinis:TNZT - HFAG vs. P. gingivalis:TAV - HFAG</b>      | <b>-1,752</b>  | <b>-2,733 to -0,7699</b>  | <b>Yes</b> | <b>****</b> | <b>&lt;0,0001</b> |
| <b>S. sanguinis:TNZT - HFAG vs. P. gingivalis:TNZT - Control</b>  | <b>-1,506</b>  | <b>-2,536 to -0,4763</b>  | <b>Yes</b> | <b>****</b> | <b>&lt;0,0001</b> |
| <b>S. sanguinis:TNZT - HFAG vs. P. gingivalis:TNZT - CaP</b>      | <b>-2,705</b>  | <b>-3,803 to -1,607</b>   | <b>Yes</b> | <b>****</b> | <b>&lt;0,0001</b> |
| <b>S. sanguinis:TNZT - HFAG vs. P. gingivalis:TNZT - CaPAg</b>    | <b>-2,688</b>  | <b>-3,670 to -1,707</b>   | <b>Yes</b> | <b>****</b> | <b>&lt;0,0001</b> |
| <b>S. sanguinis:TNZT - HFAG vs. P. gingivalis:TNZT - HF</b>       | <b>-1,943</b>  | <b>-2,925 to -0,9616</b>  | <b>Yes</b> | <b>****</b> | <b>&lt;0,0001</b> |
| <b>S. sanguinis:TNZT - HFAG vs. P. gingivalis:TNZT - HFAG</b>     | <b>-2,383</b>  | <b>-3,365 to -1,402</b>   | <b>Yes</b> | <b>****</b> | <b>&lt;0,0001</b> |
| A. naeslundii:TAV - Control vs. A. naeslundii:TAV - CaP           | -0,3950        | -1,377 to 0,5867          | No         | ns          | >0,9999           |
| A. naeslundii:TAV - Control vs. A. naeslundii:TAV - CaPAg         | -0,5417        | -1,523 to 0,4401          | No         | ns          | 0,9776            |
| A. naeslundii:TAV - Control vs. A. naeslundii:TAV - HF            | 0,1690         | -0,8607 to 1,199          | No         | ns          | >0,9999           |
| A. naeslundii:TAV - Control vs. A. naeslundii:TAV - HFAG          | 0,3783         | -0,6034 to 1,360          | No         | ns          | >0,9999           |
| A. naeslundii:TAV - Control vs. A. naeslundii:TNZT - Control      | -0,5267        | -1,508 to 0,4551          | No         | ns          | 0,9852            |
| A. naeslundii:TAV - Control vs. A. naeslundii:TNZT - CaP          | -0,6967        | -1,678 to 0,2851          | No         | ns          | 0,6828            |
| A. naeslundii:TAV - Control vs. A. naeslundii:TNZT - CaPAg        | -0,3917        | -1,373 to 0,5901          | No         | ns          | >0,9999           |
| A. naeslundii:TAV - Control vs. A. naeslundii:TNZT - HF           | 0,1183         | -0,8634 to 1,100          | No         | ns          | >0,9999           |
| A. naeslundii:TAV - Control vs. A. naeslundii:TNZT - HFAG         | -0,2210        | -1,251 to 0,8087          | No         | ns          | >0,9999           |
| A. naeslundii:TAV - Control vs. P. gingivalis:TAV - Control       | -0,3717        | -1,353 to 0,6101          | No         | ns          | >0,9999           |
| <b>A. naeslundii:TAV - Control vs. P. gingivalis:TAV - CaP</b>    | <b>-1,010</b>  | <b>-1,992 to -0,02826</b> | <b>Yes</b> | <b>*</b>    | <b>0,0342</b>     |
| <b>A. naeslundii:TAV - Control vs. P. gingivalis:TAV - CaPAg</b>  | <b>-1,407</b>  | <b>-2,388 to -0,4249</b>  | <b>Yes</b> | <b>****</b> | <b>&lt;0,0001</b> |
| A. naeslundii:TAV - Control vs. P. gingivalis:TAV - HF            | -0,7417        | -1,723 to 0,2401          | No         | ns          | 0,5361            |
| A. naeslundii:TAV - Control vs. P. gingivalis:TAV - HFAG          | -0,7267        | -1,708 to 0,2551          | No         | ns          | 0,5857            |
| A. naeslundii:TAV - Control vs. P. gingivalis:TNZT - Control      | -0,4810        | -1,511 to 0,5487          | No         | ns          | 0,9986            |
| <b>A. naeslundii:TAV - Control vs. P. gingivalis:TNZT - CaP</b>   | <b>-1,680</b>  | <b>-2,778 to -0,5824</b>  | <b>Yes</b> | <b>****</b> | <b>&lt;0,0001</b> |
| <b>A. naeslundii:TAV - Control vs. P. gingivalis:TNZT - CaPAg</b> | <b>-1,663</b>  | <b>-2,645 to -0,6816</b>  | <b>Yes</b> | <b>****</b> | <b>&lt;0,0001</b> |
| A. naeslundii:TAV - Control vs. P. gingivalis:TNZT - HF           | -0,9183        | -1,900 to 0,06341         | No         | ns          | 0,1094            |
| <b>A. naeslundii:TAV - Control vs. P. gingivalis:TNZT - HFAG</b>  | <b>-1,358</b>  | <b>-2,340 to -0,3766</b>  | <b>Yes</b> | <b>***</b>  | <b>0,0001</b>     |
| A. naeslundii:TAV - CaP vs. A. naeslundii:TAV - CaPAg             | -0,1467        | -1,128 to 0,8351          | No         | ns          | >0,9999           |
| A. naeslundii:TAV - CaP vs. A. naeslundii:TAV - HF                | 0,5640         | -0,4657 to 1,594          | No         | ns          | 0,9798            |
| A. naeslundii:TAV - CaP vs. A. naeslundii:TAV - HFAG              | 0,7733         | -0,2084 to 1,755          | No         | ns          | 0,4337            |
| A. naeslundii:TAV - CaP vs. A. naeslundii:TNZT - Control          | -0,1317        | -1,113 to 0,8501          | No         | ns          | >0,9999           |
| A. naeslundii:TAV - CaP vs. A. naeslundii:TNZT - CaP              | -0,3017        | -1,283 to 0,6801          | No         | ns          | >0,9999           |
| A. naeslundii:TAV - CaP vs. A. naeslundii:TNZT - CaPAg            | 0,003333       | -0,9784 to 0,9851         | No         | ns          | >0,9999           |
| A. naeslundii:TAV - CaP vs. A. naeslundii:TNZT - HF               | 0,5133         | -0,4684 to 1,495          | No         | ns          | 0,9900            |
| A. naeslundii:TAV - CaP vs. A. naeslundii:TNZT - HFAG             | 0,1740         | -0,8557 to 1,204          | No         | ns          | >0,9999           |

|                                                                    |               |                           |            |             |                   |
|--------------------------------------------------------------------|---------------|---------------------------|------------|-------------|-------------------|
| A. naeslundii:TAV - CaP vs. P. gingivalis:TAV - Control            | 0,02333       | -0,9584 to 1,005          | No         | ns          | >0,9999           |
| A. naeslundii:TAV - CaP vs. P. gingivalis:TAV - CaP                | -0,6150       | -1,597 to 0,3667          | No         | ns          | 0,8922            |
| <b>A. naeslundii:TAV - CaP vs. P. gingivalis:TAV - CaPAg</b>       | <b>-1,012</b> | <b>-1,993 to -0,02992</b> | <b>Yes</b> | <b>*</b>    | <b>0,0334</b>     |
| A. naeslundii:TAV - CaP vs. P. gingivalis:TAV - HF                 | -0,3467       | -1,328 to 0,6351          | No         | ns          | >0,9999           |
| A. naeslundii:TAV - CaP vs. P. gingivalis:TAV - HFAg               | -0,3317       | -1,313 to 0,6501          | No         | ns          | >0,9999           |
| A. naeslundii:TAV - CaP vs. P. gingivalis:TNZT - Control           | -0,08600      | -1,116 to 0,9437          | No         | ns          | >0,9999           |
| <b>A. naeslundii:TAV - CaP vs. P. gingivalis:TNZT - CaP</b>        | <b>-1,285</b> | <b>-2,383 to -0,1874</b>  | <b>Yes</b> | <b>**</b>   | <b>0,0042</b>     |
| <b>A. naeslundii:TAV - CaP vs. P. gingivalis:TNZT - CaPAg</b>      | <b>-1,268</b> | <b>-2,250 to -0,2866</b>  | <b>Yes</b> | <b>***</b>  | <b>0,0005</b>     |
| A. naeslundii:TAV - CaP vs. P. gingivalis:TNZT - HF                | -0,5233       | -1,505 to 0,4584          | No         | ns          | 0,9865            |
| A. naeslundii:TAV - CaP vs. P. gingivalis:TNZT - HFAg              | -0,9633       | -1,945 to 0,01841         | No         | ns          | 0,0634            |
| A. naeslundii:TAV - CaPAg vs. A. naeslundii:TAV - HF               | 0,7107        | -0,3190 to 1,740          | No         | ns          | 0,7408            |
| A. naeslundii:TAV - CaPAg vs. A. naeslundii:TAV - HFAg             | 0,9200        | -0,06174 to 1,902         | No         | ns          | 0,1073            |
| A. naeslundii:TAV - CaPAg vs. A. naeslundii:TNZT - Control         | 0,01500       | -0,9667 to 0,9967         | No         | ns          | >0,9999           |
| A. naeslundii:TAV - CaPAg vs. A. naeslundii:TNZT - CaP             | -0,1550       | -1,137 to 0,8267          | No         | ns          | >0,9999           |
| A. naeslundii:TAV - CaPAg vs. A. naeslundii:TNZT - CaPAg           | 0,1500        | -0,8317 to 1,132          | No         | ns          | >0,9999           |
| A. naeslundii:TAV - CaPAg vs. P. gingivalis:TNZT - HF              | 0,6600        | -0,3217 to 1,642          | No         | ns          | 0,7902            |
| A. naeslundii:TAV - CaPAg vs. A. naeslundii:TNZT - HFAg            | 0,3207        | -0,7090 to 1,350          | No         | ns          | >0,9999           |
| A. naeslundii:TAV - CaPAg vs. P. gingivalis:TAV - Control          | 0,1700        | -0,8117 to 1,152          | No         | ns          | >0,9999           |
| A. naeslundii:TAV - CaPAg vs. P. gingivalis:TAV - CaP              | -0,4683       | -1,450 to 0,5134          | No         | ns          | 0,9979            |
| A. naeslundii:TAV - CaPAg vs. P. gingivalis:TAV - CaPAg            | -0,8650       | -1,847 to 0,1167          | No         | ns          | 0,1952            |
| A. naeslundii:TAV - CaPAg vs. P. gingivalis:TAV - HF               | -0,2000       | -1,182 to 0,7817          | No         | ns          | >0,9999           |
| A. naeslundii:TAV - CaPAg vs. P. gingivalis:TAV - HFAg             | -0,1850       | -1,167 to 0,7967          | No         | ns          | >0,9999           |
| A. naeslundii:TAV - CaPAg vs. P. gingivalis:TNZT - Control         | 0,06067       | -0,9690 to 1,090          | No         | ns          | >0,9999           |
| <b>A. naeslundii:TAV - CaPAg vs. P. gingivalis:TNZT - CaP</b>      | <b>-1,138</b> | <b>-2,236 to -0,04071</b> | <b>Yes</b> | <b>*</b>    | <b>0,0306</b>     |
| <b>A. naeslundii:TAV - CaPAg vs. P. gingivalis:TNZT - CaPAg</b>    | <b>-1,122</b> | <b>-2,103 to -0,1399</b>  | <b>Yes</b> | <b>**</b>   | <b>0,0065</b>     |
| A. naeslundii:TAV - CaPAg vs. P. gingivalis:TNZT - HF              | -0,3767       | -1,358 to 0,6051          | No         | ns          | >0,9999           |
| A. naeslundii:TAV - CaPAg vs. P. gingivalis:TNZT - HFAg            | -0,8167       | -1,798 to 0,1651          | No         | ns          | 0,3074            |
| A. naeslundii:TAV - HF vs. A. naeslundii:TAV - HFAg                | 0,2093        | -0,8203 to 1,239          | No         | ns          | >0,9999           |
| A. naeslundii:TAV - HF vs. A. naeslundii:TNZT - Control            | -0,6957       | -1,725 to 0,3340          | No         | ns          | 0,7813            |
| A. naeslundii:TAV - HF vs. A. naeslundii:TNZT - CaP                | -0,8657       | -1,895 to 0,1640          | No         | ns          | 0,2847            |
| A. naeslundii:TAV - HF vs. A. naeslundii:TNZT - CaPAg              | -0,5607       | -1,590 to 0,4690          | No         | ns          | 0,9815            |
| A. naeslundii:TAV - HF vs. A. naeslundii:TNZT - HF                 | -0,05067      | -1,080 to 0,9790          | No         | ns          | >0,9999           |
| A. naeslundii:TAV - HF vs. A. naeslundii:TNZT - HFAg               | -0,3900       | -1,465 to 0,6854          | No         | ns          | >0,9999           |
| A. naeslundii:TAV - HF vs. P. gingivalis:TAV - Control             | -0,5407       | -1,570 to 0,4890          | No         | ns          | 0,9893            |
| <b>A. naeslundii:TAV - HF vs. P. gingivalis:TAV - CaP</b>          | <b>-1,179</b> | <b>-2,209 to -0,1493</b>  | <b>Yes</b> | <b>**</b>   | <b>0,0063</b>     |
| <b>A. naeslundii:TAV - HF vs. P. gingivalis:TAV - CaPAg</b>        | <b>-1,576</b> | <b>-2,605 to -0,5460</b>  | <b>Yes</b> | <b>****</b> | <b>&lt;0,0001</b> |
| A. naeslundii:TAV - HF vs. P. gingivalis:TAV - HF                  | -0,9107       | -1,940 to 0,1190          | No         | ns          | 0,1888            |
| A. naeslundii:TAV - HF vs. P. gingivalis:TAV - HFAg                | -0,8957       | -1,925 to 0,1340          | No         | ns          | 0,2179            |
| A. naeslundii:TAV - HF vs. P. gingivalis:TNZT - Control            | -0,6500       | -1,725 to 0,4254          | No         | ns          | 0,9273            |
| <b>A. naeslundii:TAV - HF vs. P. gingivalis:TNZT - CaP</b>         | <b>-1,849</b> | <b>-2,990 to -0,7083</b>  | <b>Yes</b> | <b>****</b> | <b>&lt;0,0001</b> |
| <b>A. naeslundii:TAV - HF vs. P. gingivalis:TNZT - CaPAg</b>       | <b>-1,832</b> | <b>-2,862 to -0,8027</b>  | <b>Yes</b> | <b>****</b> | <b>&lt;0,0001</b> |
| <b>A. naeslundii:TAV - HF vs. P. gingivalis:TNZT - HF</b>          | <b>-1,087</b> | <b>-2,117 to -0,05767</b> | <b>Yes</b> | <b>*</b>    | <b>0,0235</b>     |
| <b>A. naeslundii:TAV - HF vs. P. gingivalis:TNZT - HFAg</b>        | <b>-1,527</b> | <b>-2,557 to -0,4977</b>  | <b>Yes</b> | <b>****</b> | <b>&lt;0,0001</b> |
| A. naeslundii:TAV - HFAg vs. A. naeslundii:TNZT - Control          | -0,9050       | -1,887 to 0,07674         | No         | ns          | 0,1274            |
| <b>A. naeslundii:TAV - HFAg vs. A. naeslundii:TNZT - CaP</b>       | <b>-1,075</b> | <b>-2,057 to -0,09326</b> | <b>Yes</b> | <b>*</b>    | <b>0,0134</b>     |
| A. naeslundii:TAV - HFAg vs. A. naeslundii:TNZT - CaPAg            | -0,7700       | -1,752 to 0,2117          | No         | ns          | 0,4442            |
| A. naeslundii:TAV - HFAg vs. A. naeslundii:TNZT - HF               | -0,2600       | -1,242 to 0,7217          | No         | ns          | >0,9999           |
| A. naeslundii:TAV - HFAg vs. A. naeslundii:TNZT - HFAg             | -0,5993       | -1,629 to 0,4303          | No         | ns          | 0,9539            |
| A. naeslundii:TAV - HFAg vs. P. gingivalis:TAV - Control           | -0,7500       | -1,732 to 0,2317          | No         | ns          | 0,5087            |
| <b>A. naeslundii:TAV - HFAg vs. P. gingivalis:TAV - CaP</b>        | <b>-1,388</b> | <b>-2,370 to -0,4066</b>  | <b>Yes</b> | <b>****</b> | <b>&lt;0,0001</b> |
| <b>A. naeslundii:TAV - HFAg vs. P. gingivalis:TAV - CaPAg</b>      | <b>-1,785</b> | <b>-2,767 to -0,8033</b>  | <b>Yes</b> | <b>****</b> | <b>&lt;0,0001</b> |
| <b>A. naeslundii:TAV - HFAg vs. P. gingivalis:TAV - HF</b>         | <b>-1,120</b> | <b>-2,102 to -0,1383</b>  | <b>Yes</b> | <b>**</b>   | <b>0,0067</b>     |
| <b>A. naeslundii:TAV - HFAg vs. P. gingivalis:TAV - HFAg</b>       | <b>-1,105</b> | <b>-2,087 to -0,1233</b>  | <b>Yes</b> | <b>**</b>   | <b>0,0085</b>     |
| A. naeslundii:TAV - HFAg vs. P. gingivalis:TNZT - Control          | -0,8593       | -1,889 to 0,1703          | No         | ns          | 0,3003            |
| <b>A. naeslundii:TAV - HFAg vs. P. gingivalis:TNZT - CaP</b>       | <b>-2,058</b> | <b>-3,156 to -0,9607</b>  | <b>Yes</b> | <b>****</b> | <b>&lt;0,0001</b> |
| <b>A. naeslundii:TAV - HFAg vs. P. gingivalis:TNZT - CaPAg</b>     | <b>-2,042</b> | <b>-3,023 to -1,060</b>   | <b>Yes</b> | <b>****</b> | <b>&lt;0,0001</b> |
| <b>A. naeslundii:TAV - HFAg vs. P. gingivalis:TNZT - HF</b>        | <b>-1,297</b> | <b>-2,278 to -0,3149</b>  | <b>Yes</b> | <b>***</b>  | <b>0,0003</b>     |
| <b>A. naeslundii:TAV - HFAg vs. P. gingivalis:TNZT - HFAg</b>      | <b>-1,737</b> | <b>-2,718 to -0,7549</b>  | <b>Yes</b> | <b>****</b> | <b>&lt;0,0001</b> |
| A. naeslundii:TNZT - Control vs. A. naeslundii:TNZT - CaP          | -0,1700       | -1,152 to 0,8117          | No         | ns          | >0,9999           |
| A. naeslundii:TNZT - Control vs. A. naeslundii:TNZT - CaPAg        | 0,1350        | -0,8467 to 1,117          | No         | ns          | >0,9999           |
| A. naeslundii:TNZT - Control vs. A. naeslundii:TNZT - HF           | 0,6450        | -0,3367 to 1,627          | No         | ns          | 0,8283            |
| A. naeslundii:TNZT - Control vs. A. naeslundii:TNZT - HFAg         | 0,3057        | -0,7240 to 1,335          | No         | ns          | >0,9999           |
| A. naeslundii:TNZT - Control vs. P. gingivalis:TAV - Control       | 0,1550        | -0,8267 to 1,137          | No         | ns          | >0,9999           |
| A. naeslundii:TNZT - Control vs. P. gingivalis:TAV - CaP           | -0,4833       | -1,465 to 0,4984          | No         | ns          | 0,9964            |
| A. naeslundii:TNZT - Control vs. P. gingivalis:TAV - CaPAg         | -0,8800       | -1,862 to 0,1017          | No         | ns          | 0,1672            |
| A. naeslundii:TNZT - Control vs. P. gingivalis:TAV - HF            | -0,2150       | -1,197 to 0,7667          | No         | ns          | >0,9999           |
| A. naeslundii:TNZT - Control vs. P. gingivalis:TAV - HFAg          | -0,2000       | -1,182 to 0,7817          | No         | ns          | >0,9999           |
| A. naeslundii:TNZT - Control vs. P. gingivalis:TNZT - Control      | 0,04567       | -0,9840 to 1,075          | No         | ns          | >0,9999           |
| <b>A. naeslundii:TNZT - Control vs. P. gingivalis:TNZT - CaP</b>   | <b>-1,153</b> | <b>-2,251 to -0,05571</b> | <b>Yes</b> | <b>*</b>    | <b>0,0253</b>     |
| <b>A. naeslundii:TNZT - Control vs. P. gingivalis:TNZT - CaPAg</b> | <b>-1,137</b> | <b>-2,118 to -0,1549</b>  | <b>Yes</b> | <b>**</b>   | <b>0,0051</b>     |
| A. naeslundii:TNZT - Control vs. P. gingivalis:TNZT - HF           | -0,3917       | -1,373 to 0,5901          | No         | ns          | >0,9999           |
| A. naeslundii:TNZT - Control vs. P. gingivalis:TNZT - HFAg         | -0,8317       | -1,813 to 0,1501          | No         | ns          | 0,2690            |

|                                                                   |                |                            |            |             |                   |
|-------------------------------------------------------------------|----------------|----------------------------|------------|-------------|-------------------|
| A. naeslundii:TNZT - CaP vs. A. naeslundii:TNZT - CaPAg           | 0,3050         | -0,6767 to 1,287           | No         | ns          | >0,9999           |
| A. naeslundii:TNZT - CaP vs. A. naeslundii:TNZT - HF              | 0,8150         | -0,1667 to 1,797           | No         | ns          | 0,3118            |
| A. naeslundii:TNZT - CaP vs. A. naeslundii:TNZT - HFAG            | 0,4757         | -0,5540 to 1,505           | No         | ns          | 0,9989            |
| A. naeslundii:TNZT - CaP vs. P. gingivalis:TAV - Control          | 0,3250         | -0,6567 to 1,307           | No         | ns          | >0,9999           |
| A. naeslundii:TNZT - CaP vs. P. gingivalis:TAV - CaP              | -0,3133        | -1,295 to 0,6684           | No         | ns          | >0,9999           |
| A. naeslundii:TNZT - CaP vs. P. gingivalis:TAV - CaPAg            | -0,7100        | -1,692 to 0,2717           | No         | ns          | 0,6402            |
| A. naeslundii:TNZT - CaP vs. P. gingivalis:TAV - HF               | -0,04500       | -1,027 to 0,9367           | No         | ns          | >0,9999           |
| A. naeslundii:TNZT - CaP vs. P. gingivalis:TAV - HFAG             | -0,03000       | -1,012 to 0,9517           | No         | ns          | >0,9999           |
| A. naeslundii:TNZT - CaP vs. P. gingivalis:TNZT - Control         | 0,2157         | -0,8140 to 1,245           | No         | ns          | >0,9999           |
| A. naeslundii:TNZT - CaP vs. P. gingivalis:TNZT - CaP             | -0,9833        | -2,081 to 0,1143           | No         | ns          | 0,1681            |
| A. naeslundii:TNZT - CaP vs. P. gingivalis:TNZT - CaPAg           | -0,9667        | -1,948 to 0,01508          | No         | ns          | 0,0608            |
| A. naeslundii:TNZT - CaP vs. P. gingivalis:TNZT - HF              | -0,2217        | -1,203 to 0,7601           | No         | ns          | >0,9999           |
| A. naeslundii:TNZT - CaP vs. P. gingivalis:TNZT - HFAG            | -0,6617        | -1,643 to 0,3201           | No         | ns          | 0,7857            |
| A. naeslundii:TNZT - CaPAg vs. A. naeslundii:TNZT - HF            | 0,5100         | -0,4717 to 1,492           | No         | ns          | 0,9910            |
| A. naeslundii:TNZT - CaPAg vs. A. naeslundii:TNZT - HFAG          | 0,1707         | -0,8590 to 1,200           | No         | ns          | >0,9999           |
| A. naeslundii:TNZT - CaPAg vs. P. gingivalis:TAV - Control        | 0,02000        | -0,9617 to 1,002           | No         | ns          | >0,9999           |
| A. naeslundii:TNZT - CaPAg vs. P. gingivalis:TAV - CaP            | -0,6183        | -1,600 to 0,3634           | No         | ns          | 0,8860            |
| <b>A. naeslundii:TNZT - CaPAg vs. P. gingivalis:TAV - CaPAg</b>   | <b>-1,015</b>  | <b>-1,997 to -0,03326</b>  | <b>Yes</b> | <b>*</b>    | <b>0,0319</b>     |
| A. naeslundii:TNZT - CaPAg vs. P. gingivalis:TAV - HF             | -0,3500        | -1,332 to 0,6317           | No         | ns          | >0,9999           |
| A. naeslundii:TNZT - CaPAg vs. P. gingivalis:TAV - HFAG           | -0,3350        | -1,317 to 0,6467           | No         | ns          | >0,9999           |
| A. naeslundii:TNZT - CaPAg vs. P. gingivalis:TNZT - Control       | -0,08933       | -1,119 to 0,9403           | No         | ns          | >0,9999           |
| <b>A. naeslundii:TNZT - CaPAg vs. P. gingivalis:TNZT - CaP</b>    | <b>-1,288</b>  | <b>-2,386 to -0,1907</b>   | <b>Yes</b> | <b>**</b>   | <b>0,0040</b>     |
| <b>A. naeslundii:TNZT - CaPAg vs. P. gingivalis:TNZT - CaPAg</b>  | <b>-1,272</b>  | <b>-2,253 to -0,2899</b>   | <b>Yes</b> | <b>***</b>  | <b>0,0005</b>     |
| A. naeslundii:TNZT - CaPAg vs. P. gingivalis:TNZT - HF            | -0,5267        | -1,508 to 0,4551           | No         | ns          | 0,9852            |
| A. naeslundii:TNZT - CaPAg vs. P. gingivalis:TNZT - HFAG          | -0,9667        | -1,948 to 0,01508          | No         | ns          | 0,0608            |
| A. naeslundii:TNZT - HF vs. A. naeslundii:TNZT - HFAG             | -0,3393        | -1,369 to 0,6903           | No         | ns          | >0,9999           |
| A. naeslundii:TNZT - HF vs. P. gingivalis:TAV - Control           | -0,4900        | -1,472 to 0,4917           | No         | ns          | 0,9954            |
| <b>A. naeslundii:TNZT - HF vs. P. gingivalis:TAV - CaP</b>        | <b>-1,128</b>  | <b>-2,110 to -0,1466</b>   | <b>Yes</b> | <b>**</b>   | <b>0,0059</b>     |
| <b>A. naeslundii:TNZT - HF vs. P. gingivalis:TAV - CaPAg</b>      | <b>-1,525</b>  | <b>-2,507 to -0,5433</b>   | <b>Yes</b> | <b>****</b> | <b>&lt;0,0001</b> |
| A. naeslundii:TNZT - HF vs. P. gingivalis:TAV - HF                | -0,8600        | -1,842 to 0,1217           | No         | ns          | 0,2053            |
| A. naeslundii:TNZT - HF vs. P. gingivalis:TAV - HFAG              | -0,8450        | -1,827 to 0,1367           | No         | ns          | 0,2376            |
| A. naeslundii:TNZT - HF vs. P. gingivalis:TNZT - Control          | -0,5993        | -1,629 to 0,4303           | No         | ns          | 0,9539            |
| <b>A. naeslundii:TNZT - HF vs. P. gingivalis:TNZT - CaP</b>       | <b>-1,798</b>  | <b>-2,896 to -0,7007</b>   | <b>Yes</b> | <b>****</b> | <b>&lt;0,0001</b> |
| <b>A. naeslundii:TNZT - HF vs. P. gingivalis:TNZT - CaPAg</b>     | <b>-1,782</b>  | <b>-2,763 to -0,7999</b>   | <b>Yes</b> | <b>****</b> | <b>&lt;0,0001</b> |
| <b>A. naeslundii:TNZT - HF vs. P. gingivalis:TNZT - HF</b>        | <b>-1,037</b>  | <b>-2,018 to -0,05492</b>  | <b>Yes</b> | <b>*</b>    | <b>0,0236</b>     |
| <b>A. naeslundii:TNZT - HF vs. P. gingivalis:TNZT - HFAG</b>      | <b>-1,477</b>  | <b>-2,458 to -0,4949</b>   | <b>Yes</b> | <b>****</b> | <b>&lt;0,0001</b> |
| A. naeslundii:TNZT - HFAG vs. P. gingivalis:TAV - Control         | -0,1507        | -1,180 to 0,8790           | No         | ns          | >0,9999           |
| A. naeslundii:TNZT - HFAG vs. P. gingivalis:TAV - CaP             | -0,7890        | -1,819 to 0,2407           | No         | ns          | 0,5013            |
| <b>A. naeslundii:TNZT - HFAG vs. P. gingivalis:TAV - CaPAg</b>    | <b>-1,186</b>  | <b>-2,215 to -0,1560</b>   | <b>Yes</b> | <b>**</b>   | <b>0,0057</b>     |
| A. naeslundii:TNZT - HFAG vs. P. gingivalis:TAV - HF              | -0,5207        | -1,550 to 0,5090           | No         | ns          | 0,9942            |
| A. naeslundii:TNZT - HFAG vs. P. gingivalis:TAV - HFAG            | -0,5057        | -1,535 to 0,5240           | No         | ns          | 0,9965            |
| A. naeslundii:TNZT - HFAG vs. P. gingivalis:TNZT - Control        | -0,2600        | -1,335 to 0,8154           | No         | ns          | >0,9999           |
| <b>A. naeslundii:TNZT - HFAG vs. P. gingivalis:TNZT - CaP</b>     | <b>-1,459</b>  | <b>-2,600 to -0,3183</b>   | <b>Yes</b> | <b>***</b>  | <b>0,0007</b>     |
| <b>A. naeslundii:TNZT - HFAG vs. P. gingivalis:TNZT - CaPAg</b>   | <b>-1,442</b>  | <b>-2,472 to -0,4127</b>   | <b>Yes</b> | <b>****</b> | <b>&lt;0,0001</b> |
| A. naeslundii:TNZT - HFAG vs. P. gingivalis:TNZT - HF             | -0,6973        | -1,727 to 0,3323           | No         | ns          | 0,7769            |
| <b>A. naeslundii:TNZT - HFAG vs. P. gingivalis:TNZT - HFAG</b>    | <b>-1,137</b>  | <b>-2,167 to -0,1077</b>   | <b>Yes</b> | <b>*</b>    | <b>0,0117</b>     |
| P. gingivalis:TAV - Control vs. P. gingivalis:TAV - CaP           | -0,6383        | -1,620 to 0,3434           | No         | ns          | 0,8440            |
| <b>P. gingivalis:TAV - Control vs. P. gingivalis:TAV - CaPAg</b>  | <b>-1,035</b>  | <b>-2,017 to -0,05326</b>  | <b>Yes</b> | <b>*</b>    | <b>0,0241</b>     |
| P. gingivalis:TAV - Control vs. P. gingivalis:TAV - HF            | -0,3700        | -1,352 to 0,6117           | No         | ns          | >0,9999           |
| P. gingivalis:TAV - Control vs. P. gingivalis:TAV - HFAG          | -0,3550        | -1,337 to 0,6267           | No         | ns          | >0,9999           |
| P. gingivalis:TAV - Control vs. P. gingivalis:TNZT - Control      | -0,1093        | -1,139 to 0,9203           | No         | ns          | >0,9999           |
| <b>P. gingivalis:TAV - Control vs. P. gingivalis:TNZT - CaP</b>   | <b>-1,308</b>  | <b>-2,406 to -0,2107</b>   | <b>Yes</b> | <b>**</b>   | <b>0,0030</b>     |
| <b>P. gingivalis:TAV - Control vs. P. gingivalis:TNZT - CaPAg</b> | <b>-1,292</b>  | <b>-2,273 to -0,3099</b>   | <b>Yes</b> | <b>***</b>  | <b>0,0004</b>     |
| P. gingivalis:TAV - Control vs. P. gingivalis:TNZT - HF           | -0,5467        | -1,528 to 0,4351           | No         | ns          | 0,9745            |
| <b>P. gingivalis:TAV - Control vs. P. gingivalis:TNZT - HFAG</b>  | <b>-0,9867</b> | <b>-1,968 to -0,004922</b> | <b>Yes</b> | <b>*</b>    | <b>0,0469</b>     |
| P. gingivalis:TAV - CaP vs. P. gingivalis:TAV - CaPAg             | -0,3967        | -1,378 to 0,5851           | No         | ns          | >0,9999           |
| P. gingivalis:TAV - CaP vs. P. gingivalis:TAV - HF                | 0,2683         | -0,7134 to 1,250           | No         | ns          | >0,9999           |
| P. gingivalis:TAV - CaP vs. P. gingivalis:TAV - HFAG              | 0,2833         | -0,6984 to 1,265           | No         | ns          | >0,9999           |
| P. gingivalis:TAV - CaP vs. P. gingivalis:TNZT - Control          | 0,5290         | -0,5007 to 1,559           | No         | ns          | 0,9925            |
| P. gingivalis:TAV - CaP vs. P. gingivalis:TNZT - CaP              | -0,6700        | -1,768 to 0,4276           | No         | ns          | 0,9186            |
| P. gingivalis:TAV - CaP vs. P. gingivalis:TNZT - CaPAg            | -0,6533        | -1,635 to 0,3284           | No         | ns          | 0,8076            |
| P. gingivalis:TAV - CaP vs. P. gingivalis:TNZT - HF               | 0,09167        | -0,8901 to 1,073           | No         | ns          | >0,9999           |
| P. gingivalis:TAV - CaP vs. P. gingivalis:TNZT - HFAG             | -0,3483        | -1,330 to 0,6334           | No         | ns          | >0,9999           |
| P. gingivalis:TAV - CaPAg vs. P. gingivalis:TAV - HF              | 0,6650         | -0,3167 to 1,647           | No         | ns          | 0,7766            |
| P. gingivalis:TAV - CaPAg vs. P. gingivalis:TAV - HFAG            | 0,6800         | -0,3017 to 1,662           | No         | ns          | 0,7337            |
| P. gingivalis:TAV - CaPAg vs. P. gingivalis:TNZT - Control        | 0,9257         | -0,1040 to 1,955           | No         | ns          | 0,1627            |
| P. gingivalis:TAV - CaPAg vs. P. gingivalis:TNZT - CaP            | -0,2733        | -1,371 to 0,8243           | No         | ns          | >0,9999           |
| P. gingivalis:TAV - CaPAg vs. P. gingivalis:TNZT - CaPAg          | -0,2567        | -1,238 to 0,7251           | No         | ns          | >0,9999           |
| P. gingivalis:TAV - CaPAg vs. P. gingivalis:TNZT - HF             | 0,4883         | -0,4934 to 1,470           | No         | ns          | 0,9957            |
| P. gingivalis:TAV - CaPAg vs. P. gingivalis:TNZT - HFAG           | 0,04833        | -0,9334 to 1,030           | No         | ns          | >0,9999           |
| P. gingivalis:TAV - HF vs. P. gingivalis:TAV - HFAG               | 0,01500        | -0,9667 to 0,9967          | No         | ns          | >0,9999           |
| P. gingivalis:TAV - HF vs. P. gingivalis:TNZT - Control           | 0,2607         | -0,7690 to 1,290           | No         | ns          | >0,9999           |

|                                                                                  |               |                           |            |           |               |
|----------------------------------------------------------------------------------|---------------|---------------------------|------------|-----------|---------------|
| <i>P. gingivalis</i> :TAV - HF vs. <i>P. gingivalis</i> :TNZT - CaP              | -0,9383       | -2,036 to 0,1593          | No         | ns        | 0,2508        |
| <i>P. gingivalis</i> :TAV - HF vs. <i>P. gingivalis</i> :TNZT - CaPAg            | -0,9217       | -1,903 to 0,06008         | No         | ns        | 0,1053        |
| <i>P. gingivalis</i> :TAV - HF vs. <i>P. gingivalis</i> :TNZT - HF               | -0,1767       | -1,158 to 0,8051          | No         | ns        | >0,9999       |
| <i>P. gingivalis</i> :TAV - HF vs. <i>P. gingivalis</i> :TNZT - HFAG             | -0,6167       | -1,598 to 0,3651          | No         | ns        | 0,8891        |
| <i>P. gingivalis</i> :TAV - HFAG vs. <i>P. gingivalis</i> :TNZT - Control        | 0,2457        | -0,7840 to 1,275          | No         | ns        | >0,9999       |
| <i>P. gingivalis</i> :TAV - HFAG vs. <i>P. gingivalis</i> :TNZT - CaP            | -0,9533       | -2,051 to 0,1443          | No         | ns        | 0,2206        |
| <i>P. gingivalis</i> :TAV - HFAG vs. <i>P. gingivalis</i> :TNZT - CaPAg          | -0,9367       | -1,918 to 0,04508         | No         | ns        | 0,0881        |
| <i>P. gingivalis</i> :TAV - HFAG vs. <i>P. gingivalis</i> :TNZT - HF             | -0,1917       | -1,173 to 0,7901          | No         | ns        | >0,9999       |
| <i>P. gingivalis</i> :TAV - HFAG vs. <i>P. gingivalis</i> :TNZT - HFAG           | -0,6317       | -1,613 to 0,3501          | No         | ns        | 0,8589        |
| <b><i>P. gingivalis</i>:TNZT - Control vs. <i>P. gingivalis</i>:TNZT - CaP</b>   | <b>-1,199</b> | <b>-2,340 to -0,05832</b> | <b>Yes</b> | <b>*</b>  | <b>0,0252</b> |
| <b><i>P. gingivalis</i>:TNZT - Control vs. <i>P. gingivalis</i>:TNZT - CaPAg</b> | <b>-1,182</b> | <b>-2,212 to -0,1527</b>  | <b>Yes</b> | <b>**</b> | <b>0,0060</b> |
| <i>P. gingivalis</i> :TNZT - Control vs. <i>P. gingivalis</i> :TNZT - HF         | -0,4373       | -1,467 to 0,5923          | No         | ns        | 0,9998        |
| <i>P. gingivalis</i> :TNZT - Control vs. <i>P. gingivalis</i> :TNZT - HFAG       | -0,8773       | -1,907 to 0,1523          | No         | ns        | 0,2573        |
| <i>P. gingivalis</i> :TNZT - CaP vs. <i>P. gingivalis</i> :TNZT - CaPAg          | 0,01667       | -1,081 to 1,114           | No         | ns        | >0,9999       |
| <i>P. gingivalis</i> :TNZT - CaP vs. <i>P. gingivalis</i> :TNZT - HF             | 0,7617        | -0,3360 to 1,859          | No         | ns        | 0,7300        |
| <i>P. gingivalis</i> :TNZT - CaP vs. <i>P. gingivalis</i> :TNZT - HFAG           | 0,3217        | -0,7760 to 1,419          | No         | ns        | >0,9999       |
| <i>P. gingivalis</i> :TNZT - CaPAg vs. <i>P. gingivalis</i> :TNZT - HF           | 0,7450        | -0,2367 to 1,727          | No         | ns        | 0,5251        |
| <i>P. gingivalis</i> :TNZT - CaPAg vs. <i>P. gingivalis</i> :TNZT - HFAG         | 0,3050        | -0,6767 to 1,287          | No         | ns        | >0,9999       |
| <i>P. gingivalis</i> :TNZT - HF vs. <i>P. gingivalis</i> :TNZT - HFAG            | -0,4400       | -1,422 to 0,5417          | No         | ns        | 0,9994        |

**Table S2. Statistical analysis of the bacterial biofilm data.**

|                             |                      |         |                 |                      |          |
|-----------------------------|----------------------|---------|-----------------|----------------------|----------|
| Table Analyzed              | Grouped:             |         |                 |                      |          |
| Two-way ANOVA               | Ordinary             |         |                 |                      |          |
| Alpha                       | 0,05                 |         |                 |                      |          |
| Source of Variation         | % of total variation | P value | P value summary | Significant?         |          |
| Interaction                 | 5,578                | 0,7982  | ns              | No                   |          |
| Species                     | 41,05                | <0,0001 | ****            | Yes                  |          |
| Surface                     | 2,052                | 0,5811  | ns              | No                   |          |
| ANOVA table                 | SS (Type III)        | DF      | MS              | F (DFn, DFd)         | P value  |
| Interaction                 | 18,58                | 27      | 0,6883          | F (27, 191) = 0,7601 | P=0,7982 |
| Species                     | 136,7                | 3       | 45,58           | F (3, 191) = 50,34   | P<0,0001 |
| Surface                     | 6,837                | 9       | 0,7597          | F (9, 191) = 0,8390  | P=0,5811 |
| Residual                    | 173,0                | 191     | 0,9055          |                      |          |
| Data summary                |                      |         |                 |                      |          |
| Number of columns (Surface) | 10                   |         |                 |                      |          |
| Number of rows (Species)    | 4                    |         |                 |                      |          |
| Number of values            | 231                  |         |                 |                      |          |

### Multiple comparisons

|                                                                            |                           |                    |                  |         |                  |
|----------------------------------------------------------------------------|---------------------------|--------------------|------------------|---------|------------------|
| Compare cell means regardless of rows and columns                          |                           |                    |                  |         |                  |
| Number of families                                                         | 1                         |                    |                  |         |                  |
| Number of comparisons per family                                           | 780                       |                    |                  |         |                  |
| Alpha                                                                      | 0,05                      |                    |                  |         |                  |
| Tukey's multiple comparisons test                                          | Predicted (LS) mean diff. | 95,00% CI of diff. | Below threshold? | Summary | Adjusted P Value |
| <i>S. gordonii</i> :TAV - Control vs. <i>S. gordonii</i> :TAV - CaP        | 0,6583                    | -1,513 to 2,830    | No               | ns      | >0,9999          |
| <i>S. gordonii</i> :TAV - Control vs. <i>S. gordonii</i> :TAV - CaPAg      | 0,1467                    | -2,025 to 2,318    | No               | ns      | >0,9999          |
| <i>S. gordonii</i> :TAV - Control vs. <i>S. gordonii</i> :TAV - HF         | 0,1200                    | -2,051 to 2,291    | No               | ns      | >0,9999          |
| <i>S. gordonii</i> :TAV - Control vs. <i>S. gordonii</i> :TAV - HFAg       | 0,3467                    | -1,825 to 2,518    | No               | ns      | >0,9999          |
| <i>S. gordonii</i> :TAV - Control vs. <i>S. gordonii</i> :TNZT - Control   | -0,08000                  | -2,251 to 2,091    | No               | ns      | >0,9999          |
| <i>S. gordonii</i> :TAV - Control vs. <i>S. gordonii</i> :TNZT - CaP       | 1,058                     | -1,220 to 3,335    | No               | ns      | 0,9987           |
| <i>S. gordonii</i> :TAV - Control vs. <i>S. gordonii</i> :TNZT - CaPAg     | -0,04333                  | -2,215 to 2,128    | No               | ns      | >0,9999          |
| <i>S. gordonii</i> :TAV - Control vs. <i>S. gordonii</i> :TNZT - HF        | 0,3983                    | -1,773 to 2,570    | No               | ns      | >0,9999          |
| <i>S. gordonii</i> :TAV - Control vs. <i>S. gordonii</i> :TNZT - HFAg      | 0,2600                    | -1,911 to 2,431    | No               | ns      | >0,9999          |
| <i>S. gordonii</i> :TAV - Control vs. <i>S. sanguinis</i> :TAV - Control   | -0,7000                   | -2,871 to 1,471    | No               | ns      | >0,9999          |
| <i>S. gordonii</i> :TAV - Control vs. <i>S. sanguinis</i> :TAV - CaP       | -0,9500                   | -3,121 to 1,221    | No               | ns      | 0,9996           |
| <i>S. gordonii</i> :TAV - Control vs. <i>S. sanguinis</i> :TAV - CaPAg     | -0,7767                   | -2,948 to 1,395    | No               | ns      | >0,9999          |
| <i>S. gordonii</i> :TAV - Control vs. <i>S. sanguinis</i> :TAV - HF        | -0,9967                   | -3,168 to 1,175    | No               | ns      | 0,9990           |
| <i>S. gordonii</i> :TAV - Control vs. <i>S. sanguinis</i> :TAV - HFAg      | -0,7350                   | -2,906 to 1,436    | No               | ns      | >0,9999          |
| <i>S. gordonii</i> :TAV - Control vs. <i>S. sanguinis</i> :TNZT - Control  | -0,7500                   | -2,921 to 1,421    | No               | ns      | >0,9999          |
| <i>S. gordonii</i> :TAV - Control vs. <i>S. sanguinis</i> :TNZT - CaP      | -1,615                    | -3,786 to 0,5564   | No               | ns      | 0,5735           |
| <i>S. gordonii</i> :TAV - Control vs. <i>S. sanguinis</i> :TNZT - CaPAg    | -1,207                    | -3,378 to 0,9647   | No               | ns      | 0,9750           |
| <i>S. gordonii</i> :TAV - Control vs. <i>S. sanguinis</i> :TNZT - HF       | -0,9763                   | -3,254 to 1,301    | No               | ns      | 0,9998           |
| <i>S. gordonii</i> :TAV - Control vs. <i>S. sanguinis</i> :TNZT - HFAg     | -1,108                    | -3,386 to 1,169    | No               | ns      | 0,9970           |
| <i>S. gordonii</i> :TAV - Control vs. <i>A. naeslundii</i> :TAV - Control  | 0,3017                    | -1,870 to 2,473    | No               | ns      | >0,9999          |
| <i>S. gordonii</i> :TAV - Control vs. <i>A. naeslundii</i> :TAV - CaP      | 1,202                     | -1,226 to 3,629    | No               | ns      | 0,9960           |
| <i>S. gordonii</i> :TAV - Control vs. <i>A. naeslundii</i> :TAV - CaPAg    | 0,2450                    | -1,926 to 2,416    | No               | ns      | >0,9999          |
| <i>S. gordonii</i> :TAV - Control vs. <i>A. naeslundii</i> :TAV - HF       | 0,2600                    | -1,911 to 2,431    | No               | ns      | >0,9999          |
| <i>S. gordonii</i> :TAV - Control vs. <i>A. naeslundii</i> :TAV - HFAg     | 0,4567                    | -1,715 to 2,628    | No               | ns      | >0,9999          |
| <i>S. gordonii</i> :TAV - Control vs. <i>A. naeslundii</i> :TNZT - Control | 0,2183                    | -1,953 to 2,390    | No               | ns      | >0,9999          |
| <i>S. gordonii</i> :TAV - Control vs. <i>A. naeslundii</i> :TNZT - CaP     | 0,3017                    | -1,870 to 2,473    | No               | ns      | >0,9999          |
| <i>S. gordonii</i> :TAV - Control vs. <i>A. naeslundii</i> :TNZT - CaPAg   | 0,1233                    | -2,048 to 2,295    | No               | ns      | >0,9999          |
| <i>S. gordonii</i> :TAV - Control vs. <i>A. naeslundii</i> :TNZT - HF      | 0,6717                    | -1,500 to 2,843    | No               | ns      | >0,9999          |
| <i>S. gordonii</i> :TAV - Control vs. <i>A. naeslundii</i> :TNZT - HFAg    | -0,04583                  | -2,474 to 2,382    | No               | ns      | >0,9999          |
| <i>S. gordonii</i> :TAV - Control vs. <i>P. gingivalis</i> :TAV - Control  | -0,5317                   | -2,703 to 1,640    | No               | ns      | >0,9999          |
| <i>S. gordonii</i> :TAV - Control vs. <i>P. gingivalis</i> :TAV - CaP      | -1,687                    | -3,858 to 0,4847   | No               | ns      | 0,4674           |
| <i>S. gordonii</i> :TAV - Control vs. <i>P. gingivalis</i> :TAV - CaPAg    | -1,795                    | -3,966 to 0,3764   | No               | ns      | 0,3208           |
| <i>S. gordonii</i> :TAV - Control vs. <i>P. gingivalis</i> :TAV - HF       | -0,9667                   | -3,138 to 1,205    | No               | ns      | 0,9995           |
| <i>S. gordonii</i> :TAV - Control vs. <i>P. gingivalis</i> :TAV - HFAg     | -1,476                    | -3,754 to 0,8010   | No               | ns      | 0,8479           |
| <i>S. gordonii</i> :TAV - Control vs. <i>P. gingivalis</i> :TNZT - Control | -1,692                    | -3,863 to 0,4797   | No               | ns      | 0,4601           |
| <i>S. gordonii</i> :TAV - Control vs. <i>P. gingivalis</i> :TNZT - CaP     | -1,177                    | -3,348 to 0,9947   | No               | ns      | 0,9826           |
| <i>S. gordonii</i> :TAV - Control vs. <i>P. gingivalis</i> :TNZT - CaPAg   | -1,927                    | -4,098 to 0,2447   | No               | ns      | 0,1833           |
| <i>S. gordonii</i> :TAV - Control vs. <i>P. gingivalis</i> :TNZT - HF      | -1,252                    | -3,423 to 0,9197   | No               | ns      | 0,9591           |
| <i>S. gordonii</i> :TAV - Control vs. <i>P. gingivalis</i> :TNZT - HFAg    | -1,454                    | -3,732 to 0,8230   | No               | ns      | 0,8684           |
| <i>S. gordonii</i> :TAV - CaP vs. <i>S. gordonii</i> :TAV - CaPAg          | -0,5117                   | -2,683 to 1,660    | No               | ns      | >0,9999          |
| <i>S. gordonii</i> :TAV - CaP vs. <i>S. gordonii</i> :TAV - HF             | -0,5383                   | -2,710 to 1,633    | No               | ns      | >0,9999          |

|                                                                             |               |                          |            |           |               |
|-----------------------------------------------------------------------------|---------------|--------------------------|------------|-----------|---------------|
| <i>S. gordonii</i> :TAV - CaP vs. <i>S. gordonii</i> :TAV - HFAG            | -0,3117       | -2,483 to 1,860          | No         | ns        | >0,9999       |
| <i>S. gordonii</i> :TAV - CaP vs. <i>S. gordonii</i> :TNZT - Control        | -0,7383       | -2,910 to 1,433          | No         | ns        | >0,9999       |
| <i>S. gordonii</i> :TAV - CaP vs. <i>S. gordonii</i> :TNZT - CaP            | 0,3993        | -1,878 to 2,677          | No         | ns        | >0,9999       |
| <i>S. gordonii</i> :TAV - CaP vs. <i>S. gordonii</i> :TNZT - CaPAg          | -0,7017       | -2,873 to 1,470          | No         | ns        | >0,9999       |
| <i>S. gordonii</i> :TAV - CaP vs. <i>S. gordonii</i> :TNZT - HF             | -0,2600       | -2,431 to 1,911          | No         | ns        | >0,9999       |
| <i>S. gordonii</i> :TAV - CaP vs. <i>S. gordonii</i> :TNZT - HFAG           | -0,3983       | -2,570 to 1,773          | No         | ns        | >0,9999       |
| <i>S. gordonii</i> :TAV - CaP vs. <i>S. sanguinis</i> :TAV - Control        | -1,358        | -3,530 to 0,8131         | No         | ns        | 0,8934        |
| <i>S. gordonii</i> :TAV - CaP vs. <i>S. sanguinis</i> :TAV - CaP            | -1,608        | -3,780 to 0,5631         | No         | ns        | 0,5834        |
| <i>S. gordonii</i> :TAV - CaP vs. <i>S. sanguinis</i> :TAV - CaPAg          | -1,435        | -3,606 to 0,7364         | No         | ns        | 0,8185        |
| <i>S. gordonii</i> :TAV - CaP vs. <i>S. sanguinis</i> :TAV - HF             | -1,655        | -3,826 to 0,5164         | No         | ns        | 0,5139        |
| <i>S. gordonii</i> :TAV - CaP vs. <i>S. sanguinis</i> :TAV - HFAG           | -1,393        | -3,565 to 0,7781         | No         | ns        | 0,8621        |
| <i>S. gordonii</i> :TAV - CaP vs. <i>S. sanguinis</i> :TNZT - Control       | -1,408        | -3,580 to 0,7631         | No         | ns        | 0,8471        |
| <b><i>S. gordonii</i>:TAV - CaP vs. <i>S. sanguinis</i>:TNZT - CaP</b>      | <b>-2,273</b> | <b>-4,445 to -0,1019</b> | <b>Yes</b> | <b>*</b>  | <b>0,0267</b> |
| <i>S. gordonii</i> :TAV - CaP vs. <i>S. sanguinis</i> :TNZT - CaPAg         | -1,865        | -4,036 to 0,3064         | No         | ns        | 0,2414        |
| <i>S. gordonii</i> :TAV - CaP vs. <i>S. sanguinis</i> :TNZT - HF            | -1,635        | -3,912 to 0,6427         | No         | ns        | 0,6568        |
| <i>S. gordonii</i> :TAV - CaP vs. <i>S. sanguinis</i> :TNZT - HFAG          | -1,767        | -4,044 to 0,5107         | No         | ns        | 0,4706        |
| <i>S. gordonii</i> :TAV - CaP vs. <i>A. naeslundii</i> :TAV - Control       | -0,3567       | -2,528 to 1,815          | No         | ns        | >0,9999       |
| <i>S. gordonii</i> :TAV - CaP vs. <i>A. naeslundii</i> :TAV - CaP           | 0,5433        | -1,884 to 2,971          | No         | ns        | >0,9999       |
| <i>S. gordonii</i> :TAV - CaP vs. <i>A. naeslundii</i> :TAV - CaPAg         | -0,4133       | -2,585 to 1,758          | No         | ns        | >0,9999       |
| <i>S. gordonii</i> :TAV - CaP vs. <i>A. naeslundii</i> :TAV - HF            | -0,3983       | -2,570 to 1,773          | No         | ns        | >0,9999       |
| <i>S. gordonii</i> :TAV - CaP vs. <i>A. naeslundii</i> :TAV - HFAG          | -0,2017       | -2,373 to 1,970          | No         | ns        | >0,9999       |
| <i>S. gordonii</i> :TAV - CaP vs. <i>A. naeslundii</i> :TNZT - Control      | -0,4400       | -2,611 to 1,731          | No         | ns        | >0,9999       |
| <i>S. gordonii</i> :TAV - CaP vs. <i>A. naeslundii</i> :TNZT - CaP          | -0,3567       | -2,528 to 1,815          | No         | ns        | >0,9999       |
| <i>S. gordonii</i> :TAV - CaP vs. <i>A. naeslundii</i> :TNZT - CaPAg        | -0,5350       | -2,706 to 1,636          | No         | ns        | >0,9999       |
| <i>S. gordonii</i> :TAV - CaP vs. <i>A. naeslundii</i> :TNZT - HF           | 0,01333       | -2,158 to 2,185          | No         | ns        | >0,9999       |
| <i>S. gordonii</i> :TAV - CaP vs. <i>A. naeslundii</i> :TNZT - HFAG         | -0,7042       | -3,132 to 1,724          | No         | ns        | >0,9999       |
| <i>S. gordonii</i> :TAV - CaP vs. <i>P. gingivalis</i> :TAV - Control       | -1,190        | -3,361 to 0,9814         | No         | ns        | 0,9795        |
| <b><i>S. gordonii</i>:TAV - CaP vs. <i>P. gingivalis</i>:TAV - CaP</b>      | <b>-2,345</b> | <b>-4,516 to -0,1736</b> | <b>Yes</b> | <b>*</b>  | <b>0,0168</b> |
| <b><i>S. gordonii</i>:TAV - CaP vs. <i>P. gingivalis</i>:TAV - CaPAg</b>    | <b>-2,453</b> | <b>-4,625 to -0,2819</b> | <b>Yes</b> | <b>**</b> | <b>0,0080</b> |
| <i>S. gordonii</i> :TAV - CaP vs. <i>P. gingivalis</i> :TAV - HF            | -1,625        | -3,796 to 0,5464         | No         | ns        | 0,5585        |
| <i>S. gordonii</i> :TAV - CaP vs. <i>P. gingivalis</i> :TAV - HFAG          | -2,135        | -4,412 to 0,1427         | No         | ns        | 0,1070        |
| <b><i>S. gordonii</i>:TAV - CaP vs. <i>P. gingivalis</i>:TNZT - Control</b> | <b>-2,350</b> | <b>-4,521 to -0,1786</b> | <b>Yes</b> | <b>*</b>  | <b>0,0162</b> |
| <i>S. gordonii</i> :TAV - CaP vs. <i>P. gingivalis</i> :TNZT - CaP          | -1,835        | -4,006 to 0,3364         | No         | ns        | 0,2737        |
| <b><i>S. gordonii</i>:TAV - CaP vs. <i>P. gingivalis</i>:TNZT - CaPAg</b>   | <b>-2,585</b> | <b>-4,756 to -0,4136</b> | <b>Yes</b> | <b>**</b> | <b>0,0030</b> |
| <i>S. gordonii</i> :TAV - CaP vs. <i>P. gingivalis</i> :TNZT - HF           | -1,910        | -4,081 to 0,2614         | No         | ns        | 0,1979        |
| <i>S. gordonii</i> :TAV - CaP vs. <i>P. gingivalis</i> :TNZT - HFAG         | -2,113        | -4,390 to 0,1647         | No         | ns        | 0,1193        |
| <i>S. gordonii</i> :TAV - CaPAg vs. <i>S. gordonii</i> :TAV - HF            | -0,02667      | -2,198 to 2,145          | No         | ns        | >0,9999       |
| <i>S. gordonii</i> :TAV - CaPAg vs. <i>S. gordonii</i> :TAV - HFAG          | 0,2000        | -1,971 to 2,371          | No         | ns        | >0,9999       |
| <i>S. gordonii</i> :TAV - CaPAg vs. <i>S. gordonii</i> :TNZT - Control      | -0,2267       | -2,398 to 1,945          | No         | ns        | >0,9999       |
| <i>S. gordonii</i> :TAV - CaPAg vs. <i>S. gordonii</i> :TNZT - CaP          | 0,9110        | -1,366 to 3,188          | No         | ns        | >0,9999       |
| <i>S. gordonii</i> :TAV - CaPAg vs. <i>S. gordonii</i> :TNZT - CaPAg        | -0,1900       | -2,361 to 1,981          | No         | ns        | >0,9999       |
| <i>S. gordonii</i> :TAV - CaPAg vs. <i>S. gordonii</i> :TNZT - HF           | 0,2517        | -1,920 to 2,423          | No         | ns        | >0,9999       |
| <i>S. gordonii</i> :TAV - CaPAg vs. <i>S. gordonii</i> :TNZT - HFAG         | 0,1133        | -2,058 to 2,285          | No         | ns        | >0,9999       |
| <i>S. gordonii</i> :TAV - CaPAg vs. <i>S. sanguinis</i> :TAV - Control      | -0,8467       | -3,018 to 1,325          | No         | ns        | >0,9999       |
| <i>S. gordonii</i> :TAV - CaPAg vs. <i>S. sanguinis</i> :TAV - CaP          | -1,097        | -3,268 to 1,075          | No         | ns        | 0,9943        |
| <i>S. gordonii</i> :TAV - CaPAg vs. <i>S. sanguinis</i> :TAV - CaPAg        | -0,9233       | -3,095 to 1,248          | No         | ns        | 0,9998        |
| <i>S. gordonii</i> :TAV - CaPAg vs. <i>S. sanguinis</i> :TAV - HF           | -1,143        | -3,315 to 1,028          | No         | ns        | 0,9888        |
| <i>S. gordonii</i> :TAV - CaPAg vs. <i>S. sanguinis</i> :TAV - HFAG         | -0,8817       | -3,053 to 1,290          | No         | ns        | >0,9999       |
| <i>S. gordonii</i> :TAV - CaPAg vs. <i>S. sanguinis</i> :TNZT - Control     | -0,8967       | -3,068 to 1,275          | No         | ns        | 0,9999        |
| <i>S. gordonii</i> :TAV - CaPAg vs. <i>S. sanguinis</i> :TNZT - CaP         | -1,762        | -3,933 to 0,4097         | No         | ns        | 0,3632        |
| <i>S. gordonii</i> :TAV - CaPAg vs. <i>S. sanguinis</i> :TNZT - CaPAg       | -1,353        | -3,525 to 0,8181         | No         | ns        | 0,8974        |
| <i>S. gordonii</i> :TAV - CaPAg vs. <i>S. sanguinis</i> :TNZT - HF          | -1,123        | -3,400 to 1,154          | No         | ns        | 0,9962        |
| <i>S. gordonii</i> :TAV - CaPAg vs. <i>S. sanguinis</i> :TNZT - HFAG        | -1,255        | -3,532 to 1,022          | No         | ns        | 0,9778        |
| <i>S. gordonii</i> :TAV - CaPAg vs. <i>A. naeslundii</i> :TAV - Control     | 0,1550        | -2,016 to 2,326          | No         | ns        | >0,9999       |
| <i>S. gordonii</i> :TAV - CaPAg vs. <i>A. naeslundii</i> :TAV - CaP         | 1,055         | -1,373 to 3,483          | No         | ns        | 0,9997        |
| <i>S. gordonii</i> :TAV - CaPAg vs. <i>A. naeslundii</i> :TAV - CaPAg       | 0,09833       | -2,073 to 2,270          | No         | ns        | >0,9999       |
| <i>S. gordonii</i> :TAV - CaPAg vs. <i>A. naeslundii</i> :TAV - HF          | 0,1133        | -2,058 to 2,285          | No         | ns        | >0,9999       |
| <i>S. gordonii</i> :TAV - CaPAg vs. <i>A. naeslundii</i> :TAV - HFAG        | 0,3100        | -1,861 to 2,481          | No         | ns        | >0,9999       |
| <i>S. gordonii</i> :TAV - CaPAg vs. <i>A. naeslundii</i> :TNZT - Control    | 0,07167       | -2,100 to 2,243          | No         | ns        | >0,9999       |
| <i>S. gordonii</i> :TAV - CaPAg vs. <i>A. naeslundii</i> :TNZT - CaP        | 0,1550        | -2,016 to 2,326          | No         | ns        | >0,9999       |
| <i>S. gordonii</i> :TAV - CaPAg vs. <i>A. naeslundii</i> :TNZT - CaPAg      | -0,02333      | -2,195 to 2,148          | No         | ns        | >0,9999       |
| <i>S. gordonii</i> :TAV - CaPAg vs. <i>A. naeslundii</i> :TNZT - HF         | 0,5250        | -1,646 to 2,696          | No         | ns        | >0,9999       |
| <i>S. gordonii</i> :TAV - CaPAg vs. <i>A. naeslundii</i> :TNZT - HFAG       | -0,1925       | -2,620 to 2,235          | No         | ns        | >0,9999       |
| <i>S. gordonii</i> :TAV - CaPAg vs. <i>P. gingivalis</i> :TAV - Control     | -0,6783       | -2,850 to 1,493          | No         | ns        | >0,9999       |
| <i>S. gordonii</i> :TAV - CaPAg vs. <i>P. gingivalis</i> :TAV - CaP         | -1,833        | -4,005 to 0,3381         | No         | ns        | 0,2756        |
| <i>S. gordonii</i> :TAV - CaPAg vs. <i>P. gingivalis</i> :TAV - CaPAg       | -1,942        | -4,113 to 0,2297         | No         | ns        | 0,1709        |
| <i>S. gordonii</i> :TAV - CaPAg vs. <i>P. gingivalis</i> :TAV - HF          | -1,113        | -3,285 to 1,058          | No         | ns        | 0,9927        |
| <i>S. gordonii</i> :TAV - CaPAg vs. <i>P. gingivalis</i> :TAV - HFAG        | -1,623        | -3,900 to 0,6544         | No         | ns        | 0,6728        |
| <i>S. gordonii</i> :TAV - CaPAg vs. <i>P. gingivalis</i> :TNZT - Control    | -1,838        | -4,010 to 0,3331         | No         | ns        | 0,2700        |
| <i>S. gordonii</i> :TAV - CaPAg vs. <i>P. gingivalis</i> :TNZT - CaP        | -1,323        | -3,495 to 0,8481         | No         | ns        | 0,9197        |
| <i>S. gordonii</i> :TAV - CaPAg vs. <i>P. gingivalis</i> :TNZT - CaPAg      | -2,073        | -4,245 to 0,09806        | No         | ns        | 0,0873        |
| <i>S. gordonii</i> :TAV - CaPAg vs. <i>P. gingivalis</i> :TNZT - HF         | -1,398        | -3,570 to 0,7731         | No         | ns        | 0,8572        |

|                                                                            |               |                          |            |          |               |
|----------------------------------------------------------------------------|---------------|--------------------------|------------|----------|---------------|
| <i>S. gordonii</i> :TAV - CaPAg vs. <i>P. gingivalis</i> :TNZT - HFAg      | -1,601        | -3,878 to 0,6764         | No         | ns       | 0,7024        |
| <i>S. gordonii</i> :TAV - HF vs. <i>S. gordonii</i> :TAV - HFAg            | 0,2267        | -1,945 to 2,398          | No         | ns       | >0,9999       |
| <i>S. gordonii</i> :TAV - HF vs. <i>S. gordonii</i> :TNZT - Control        | -0,2000       | -2,371 to 1,971          | No         | ns       | >0,9999       |
| <i>S. gordonii</i> :TAV - HF vs. <i>S. gordonii</i> :TNZT - CaP            | 0,9377        | -1,340 to 3,215          | No         | ns       | 0,9999        |
| <i>S. gordonii</i> :TAV - HF vs. <i>S. gordonii</i> :TNZT - CaPAg          | -0,1633       | -2,335 to 2,008          | No         | ns       | >0,9999       |
| <i>S. gordonii</i> :TAV - HF vs. <i>S. gordonii</i> :TNZT - HF             | 0,2783        | -1,893 to 2,450          | No         | ns       | >0,9999       |
| <i>S. gordonii</i> :TAV - HF vs. <i>S. gordonii</i> :TNZT - HFAg           | 0,1400        | -2,031 to 2,311          | No         | ns       | >0,9999       |
| <i>S. gordonii</i> :TAV - HF vs. <i>S. sanguinis</i> :TAV - Control        | -0,8200       | -2,991 to 1,351          | No         | ns       | >0,9999       |
| <i>S. gordonii</i> :TAV - HF vs. <i>S. sanguinis</i> :TAV - CaP            | -1,070        | -3,241 to 1,101          | No         | ns       | 0,9963        |
| <i>S. gordonii</i> :TAV - HF vs. <i>S. sanguinis</i> :TAV - CaPAg          | -0,8967       | -3,068 to 1,275          | No         | ns       | 0,9999        |
| <i>S. gordonii</i> :TAV - HF vs. <i>S. sanguinis</i> :TAV - HF             | -1,117        | -3,288 to 1,055          | No         | ns       | 0,9923        |
| <i>S. gordonii</i> :TAV - HF vs. <i>S. sanguinis</i> :TAV - HFAg           | -0,8550       | -3,026 to 1,316          | No         | ns       | >0,9999       |
| <i>S. gordonii</i> :TAV - HF vs. <i>S. sanguinis</i> :TNZT - Control       | -0,8700       | -3,041 to 1,301          | No         | ns       | >0,9999       |
| <i>S. gordonii</i> :TAV - HF vs. <i>S. sanguinis</i> :TNZT - CaP           | -1,735        | -3,906 to 0,4364         | No         | ns       | 0,3990        |
| <i>S. gordonii</i> :TAV - HF vs. <i>S. sanguinis</i> :TNZT - CaPAg         | -1,327        | -3,498 to 0,8447         | No         | ns       | 0,9174        |
| <i>S. gordonii</i> :TAV - HF vs. <i>S. sanguinis</i> :TNZT - HF            | -1,096        | -3,374 to 1,181          | No         | ns       | 0,9975        |
| <i>S. gordonii</i> :TAV - HF vs. <i>S. sanguinis</i> :TNZT - HFAg          | -1,228        | -3,506 to 1,049          | No         | ns       | 0,9838        |
| <i>S. gordonii</i> :TAV - HF vs. <i>A. naeslundii</i> :TAV - Control       | 0,1817        | -1,990 to 2,353          | No         | ns       | >0,9999       |
| <i>S. gordonii</i> :TAV - HF vs. <i>A. naeslundii</i> :TAV - CaP           | 1,082         | -1,346 to 3,509          | No         | ns       | 0,9995        |
| <i>S. gordonii</i> :TAV - HF vs. <i>A. naeslundii</i> :TAV - CaPAg         | 0,1250        | -2,046 to 2,296          | No         | ns       | >0,9999       |
| <i>S. gordonii</i> :TAV - HF vs. <i>A. naeslundii</i> :TAV - HF            | 0,1400        | -2,031 to 2,311          | No         | ns       | >0,9999       |
| <i>S. gordonii</i> :TAV - HF vs. <i>A. naeslundii</i> :TAV - HFAg          | 0,3367        | -1,835 to 2,508          | No         | ns       | >0,9999       |
| <i>S. gordonii</i> :TAV - HF vs. <i>A. naeslundii</i> :TNZT - Control      | 0,09833       | -2,073 to 2,270          | No         | ns       | >0,9999       |
| <i>S. gordonii</i> :TAV - HF vs. <i>A. naeslundii</i> :TNZT - CaP          | 0,1817        | -1,990 to 2,353          | No         | ns       | >0,9999       |
| <i>S. gordonii</i> :TAV - HF vs. <i>A. naeslundii</i> :TNZT - CaPAg        | 0,003333      | -2,168 to 2,175          | No         | ns       | >0,9999       |
| <i>S. gordonii</i> :TAV - HF vs. <i>A. naeslundii</i> :TNZT - HF           | 0,5517        | -1,620 to 2,723          | No         | ns       | >0,9999       |
| <i>S. gordonii</i> :TAV - HF vs. <i>A. naeslundii</i> :TNZT - HFAg         | -0,1658       | -2,594 to 2,262          | No         | ns       | >0,9999       |
| <i>S. gordonii</i> :TAV - HF vs. <i>P. gingivalis</i> :TAV - Control       | -0,6517       | -2,823 to 1,520          | No         | ns       | >0,9999       |
| <i>S. gordonii</i> :TAV - HF vs. <i>P. gingivalis</i> :TAV - CaP           | -1,807        | -3,978 to 0,3647         | No         | ns       | 0,3066        |
| <i>S. gordonii</i> :TAV - HF vs. <i>P. gingivalis</i> :TAV - CaPAg         | -1,915        | -4,086 to 0,2564         | No         | ns       | 0,1934        |
| <i>S. gordonii</i> :TAV - HF vs. <i>P. gingivalis</i> :TAV - HF            | -1,087        | -3,258 to 1,085          | No         | ns       | 0,9951        |
| <i>S. gordonii</i> :TAV - HF vs. <i>P. gingivalis</i> :TAV - HFAg          | -1,596        | -3,874 to 0,6810         | No         | ns       | 0,7086        |
| <i>S. gordonii</i> :TAV - HF vs. <i>P. gingivalis</i> :TNZT - Control      | -1,812        | -3,983 to 0,3597         | No         | ns       | 0,3006        |
| <i>S. gordonii</i> :TAV - HF vs. <i>P. gingivalis</i> :TNZT - CaP          | -1,297        | -3,468 to 0,8747         | No         | ns       | 0,9366        |
| <i>S. gordonii</i> :TAV - HF vs. <i>P. gingivalis</i> :TNZT - CaPAg        | -2,047        | -4,218 to 0,1247         | No         | ns       | 0,1008        |
| <i>S. gordonii</i> :TAV - HF vs. <i>P. gingivalis</i> :TNZT - HF           | -1,372        | -3,543 to 0,7997         | No         | ns       | 0,8820        |
| <i>S. gordonii</i> :TAV - HF vs. <i>P. gingivalis</i> :TNZT - HFAg         | -1,574        | -3,852 to 0,7030         | No         | ns       | 0,7371        |
| <i>S. gordonii</i> :TAV - HFAg vs. <i>S. gordonii</i> :TNZT - Control      | -0,4267       | -2,598 to 1,745          | No         | ns       | >0,9999       |
| <i>S. gordonii</i> :TAV - HFAg vs. <i>S. gordonii</i> :TNZT - CaP          | 0,7110        | -1,566 to 2,988          | No         | ns       | >0,9999       |
| <i>S. gordonii</i> :TAV - HFAg vs. <i>S. gordonii</i> :TNZT - CaPAg        | -0,3900       | -2,561 to 1,781          | No         | ns       | >0,9999       |
| <i>S. gordonii</i> :TAV - HFAg vs. <i>S. gordonii</i> :TNZT - HF           | 0,05167       | -2,120 to 2,223          | No         | ns       | >0,9999       |
| <i>S. gordonii</i> :TAV - HFAg vs. <i>S. gordonii</i> :TNZT - HFAg         | -0,08667      | -2,258 to 2,085          | No         | ns       | >0,9999       |
| <i>S. gordonii</i> :TAV - HFAg vs. <i>S. sanguinis</i> :TAV - Control      | -1,047        | -3,218 to 1,125          | No         | ns       | 0,9975        |
| <i>S. gordonii</i> :TAV - HFAg vs. <i>S. sanguinis</i> :TAV - CaP          | -1,297        | -3,468 to 0,8747         | No         | ns       | 0,9366        |
| <i>S. gordonii</i> :TAV - HFAg vs. <i>S. sanguinis</i> :TAV - CaPAg        | -1,123        | -3,295 to 1,048          | No         | ns       | 0,9915        |
| <i>S. gordonii</i> :TAV - HFAg vs. <i>S. sanguinis</i> :TAV - HF           | -1,343        | -3,515 to 0,8281         | No         | ns       | 0,9053        |
| <i>S. gordonii</i> :TAV - HFAg vs. <i>S. sanguinis</i> :TAV - HFAg         | -1,082        | -3,253 to 1,090          | No         | ns       | 0,9955        |
| <i>S. gordonii</i> :TAV - HFAg vs. <i>S. sanguinis</i> :TNZT - Control     | -1,097        | -3,268 to 1,075          | No         | ns       | 0,9943        |
| <i>S. gordonii</i> :TAV - HFAg vs. <i>S. sanguinis</i> :TNZT - CaP         | -1,962        | -4,133 to 0,2097         | No         | ns       | 0,1552        |
| <i>S. gordonii</i> :TAV - HFAg vs. <i>S. sanguinis</i> :TNZT - CaPAg       | -1,553        | -3,725 to 0,6181         | No         | ns       | 0,6644        |
| <i>S. gordonii</i> :TAV - HFAg vs. <i>S. sanguinis</i> :TNZT - HF          | -1,323        | -3,600 to 0,9544         | No         | ns       | 0,9548        |
| <i>S. gordonii</i> :TAV - HFAg vs. <i>S. sanguinis</i> :TNZT - HFAg        | -1,455        | -3,732 to 0,8224         | No         | ns       | 0,8678        |
| <i>S. gordonii</i> :TAV - HFAg vs. <i>A. naeslundii</i> :TAV - Control     | -0,04500      | -2,216 to 2,126          | No         | ns       | >0,9999       |
| <i>S. gordonii</i> :TAV - HFAg vs. <i>A. naeslundii</i> :TAV - CaP         | 0,8550        | -1,573 to 3,283          | No         | ns       | >0,9999       |
| <i>S. gordonii</i> :TAV - HFAg vs. <i>A. naeslundii</i> :TAV - CaPAg       | -0,1017       | -2,273 to 2,070          | No         | ns       | >0,9999       |
| <i>S. gordonii</i> :TAV - HFAg vs. <i>A. naeslundii</i> :TAV - HF          | -0,08667      | -2,258 to 2,085          | No         | ns       | >0,9999       |
| <i>S. gordonii</i> :TAV - HFAg vs. <i>A. naeslundii</i> :TAV - HFAg        | 0,1100        | -2,061 to 2,281          | No         | ns       | >0,9999       |
| <i>S. gordonii</i> :TAV - HFAg vs. <i>A. naeslundii</i> :TNZT - Control    | -0,1283       | -2,300 to 2,043          | No         | ns       | >0,9999       |
| <i>S. gordonii</i> :TAV - HFAg vs. <i>A. naeslundii</i> :TNZT - CaP        | -0,04500      | -2,216 to 2,126          | No         | ns       | >0,9999       |
| <i>S. gordonii</i> :TAV - HFAg vs. <i>A. naeslundii</i> :TNZT - CaPAg      | -0,2233       | -2,395 to 1,948          | No         | ns       | >0,9999       |
| <i>S. gordonii</i> :TAV - HFAg vs. <i>A. naeslundii</i> :TNZT - HF         | 0,3250        | -1,846 to 2,496          | No         | ns       | >0,9999       |
| <i>S. gordonii</i> :TAV - HFAg vs. <i>A. naeslundii</i> :TNZT - HFAg       | -0,3925       | -2,820 to 2,035          | No         | ns       | >0,9999       |
| <i>S. gordonii</i> :TAV - HFAg vs. <i>P. gingivalis</i> :TAV - Control     | -0,8783       | -3,050 to 1,293          | No         | ns       | >0,9999       |
| <i>S. gordonii</i> :TAV - HFAg vs. <i>P. gingivalis</i> :TAV - CaP         | -2,033        | -4,205 to 0,1381         | No         | ns       | 0,1081        |
| <i>S. gordonii</i> :TAV - HFAg vs. <i>P. gingivalis</i> :TAV - CaPAg       | -2,142        | -4,313 to 0,02972        | No         | ns       | 0,0595        |
| <i>S. gordonii</i> :TAV - HFAg vs. <i>P. gingivalis</i> :TAV - HF          | -1,313        | -3,485 to 0,8581         | No         | ns       | 0,9264        |
| <i>S. gordonii</i> :TAV - HFAg vs. <i>P. gingivalis</i> :TAV - HFAg        | -1,823        | -4,100 to 0,4544         | No         | ns       | 0,3947        |
| <i>S. gordonii</i> :TAV - HFAg vs. <i>P. gingivalis</i> :TNZT - Control    | -2,038        | -4,210 to 0,1331         | No         | ns       | 0,1053        |
| <i>S. gordonii</i> :TAV - HFAg vs. <i>P. gingivalis</i> :TNZT - CaP        | -1,523        | -3,695 to 0,6481         | No         | ns       | 0,7068        |
| <b><i>S. gordonii</i>:TAV - HFAg vs. <i>P. gingivalis</i>:TNZT - CaPAg</b> | <b>-2,273</b> | <b>-4,445 to -0,1019</b> | <b>Yes</b> | <b>*</b> | <b>0,0267</b> |
| <i>S. gordonii</i> :TAV - HFAg vs. <i>P. gingivalis</i> :TNZT - HF         | -1,598        | -3,770 to 0,5731         | No         | ns       | 0,5983        |
| <i>S. gordonii</i> :TAV - HFAg vs. <i>P. gingivalis</i> :TNZT - HFAg       | -1,801        | -4,078 to 0,4764         | No         | ns       | 0,4237        |

|                                                                              |               |                           |            |            |               |
|------------------------------------------------------------------------------|---------------|---------------------------|------------|------------|---------------|
| <i>S. gordonii</i> :TNZT - Control vs. <i>S. gordonii</i> :TNZT - CaP        | 1,138         | -1,140 to 3,415           | No         | ns         | 0,9953        |
| <i>S. gordonii</i> :TNZT - Control vs. <i>S. gordonii</i> :TNZT - CaPAg      | 0,03667       | -2,135 to 2,208           | No         | ns         | >0,9999       |
| <i>S. gordonii</i> :TNZT - Control vs. <i>S. gordonii</i> :TNZT - HF         | 0,4783        | -1,693 to 2,650           | No         | ns         | >0,9999       |
| <i>S. gordonii</i> :TNZT - Control vs. <i>S. gordonii</i> :TNZT - HFAG       | 0,3400        | -1,831 to 2,511           | No         | ns         | >0,9999       |
| <i>S. gordonii</i> :TNZT - Control vs. <i>S. sanguinis</i> :TAV - Control    | -0,6200       | -2,791 to 1,551           | No         | ns         | >0,9999       |
| <i>S. gordonii</i> :TNZT - Control vs. <i>S. sanguinis</i> :TAV - CaP        | -0,8700       | -3,041 to 1,301           | No         | ns         | >0,9999       |
| <i>S. gordonii</i> :TNZT - Control vs. <i>S. sanguinis</i> :TAV - CaPAg      | -0,6967       | -2,868 to 1,475           | No         | ns         | >0,9999       |
| <i>S. gordonii</i> :TNZT - Control vs. <i>S. sanguinis</i> :TAV - HF         | -0,9167       | -3,088 to 1,255           | No         | ns         | 0,9998        |
| <i>S. gordonii</i> :TNZT - Control vs. <i>S. sanguinis</i> :TAV - HFAG       | -0,6550       | -2,826 to 1,516           | No         | ns         | >0,9999       |
| <i>S. gordonii</i> :TNZT - Control vs. <i>S. sanguinis</i> :TNZT - Control   | -0,6700       | -2,841 to 1,501           | No         | ns         | >0,9999       |
| <i>S. gordonii</i> :TNZT - Control vs. <i>S. sanguinis</i> :TNZT - CaP       | -1,535        | -3,706 to 0,6364          | No         | ns         | 0,6905        |
| <i>S. gordonii</i> :TNZT - Control vs. <i>S. sanguinis</i> :TNZT - CaPAg     | -1,127        | -3,298 to 1,045           | No         | ns         | 0,9911        |
| <i>S. gordonii</i> :TNZT - Control vs. <i>S. sanguinis</i> :TNZT - HF        | -0,8963       | -3,174 to 1,381           | No         | ns         | >0,9999       |
| <i>S. gordonii</i> :TNZT - Control vs. <i>S. sanguinis</i> :TNZT - HFAG      | -1,028        | -3,306 to 1,249           | No         | ns         | 0,9993        |
| <i>S. gordonii</i> :TNZT - Control vs. <i>A. naeslundii</i> :TAV - Control   | 0,3817        | -1,790 to 2,553           | No         | ns         | >0,9999       |
| <i>S. gordonii</i> :TNZT - Control vs. <i>A. naeslundii</i> :TAV - CaP       | 1,282         | -1,146 to 3,709           | No         | ns         | 0,9883        |
| <i>S. gordonii</i> :TNZT - Control vs. <i>A. naeslundii</i> :TAV - CaPAg     | 0,3250        | -1,846 to 2,496           | No         | ns         | >0,9999       |
| <i>S. gordonii</i> :TNZT - Control vs. <i>A. naeslundii</i> :TAV - HF        | 0,3400        | -1,831 to 2,511           | No         | ns         | >0,9999       |
| <i>S. gordonii</i> :TNZT - Control vs. <i>A. naeslundii</i> :TAV - HFAG      | 0,5367        | -1,635 to 2,708           | No         | ns         | >0,9999       |
| <i>S. gordonii</i> :TNZT - Control vs. <i>A. naeslundii</i> :TNZT - Control  | 0,2983        | -1,873 to 2,470           | No         | ns         | >0,9999       |
| <i>S. gordonii</i> :TNZT - Control vs. <i>A. naeslundii</i> :TNZT - CaP      | 0,3817        | -1,790 to 2,553           | No         | ns         | >0,9999       |
| <i>S. gordonii</i> :TNZT - Control vs. <i>A. naeslundii</i> :TNZT - CaPAg    | 0,2033        | -1,968 to 2,375           | No         | ns         | >0,9999       |
| <i>S. gordonii</i> :TNZT - Control vs. <i>A. naeslundii</i> :TNZT - HF       | 0,7517        | -1,420 to 2,923           | No         | ns         | >0,9999       |
| <i>S. gordonii</i> :TNZT - Control vs. <i>A. naeslundii</i> :TNZT - HFAG     | 0,03417       | -2,394 to 2,462           | No         | ns         | >0,9999       |
| <i>S. gordonii</i> :TNZT - Control vs. <i>P. gingivalis</i> :TAV - Control   | -0,4517       | -2,623 to 1,720           | No         | ns         | >0,9999       |
| <i>S. gordonii</i> :TNZT - Control vs. <i>P. gingivalis</i> :TAV - CaP       | -1,607        | -3,778 to 0,5647          | No         | ns         | 0,5859        |
| <i>S. gordonii</i> :TNZT - Control vs. <i>P. gingivalis</i> :TAV - CaPAg     | -1,715        | -3,886 to 0,4564          | No         | ns         | 0,4268        |
| <i>S. gordonii</i> :TNZT - Control vs. <i>P. gingivalis</i> :TAV - HF        | -0,8867       | -3,058 to 1,285           | No         | ns         | >0,9999       |
| <i>S. gordonii</i> :TNZT - Control vs. <i>P. gingivalis</i> :TAV - HFAG      | -1,396        | -3,674 to 0,8810          | No         | ns         | 0,9141        |
| <i>S. gordonii</i> :TNZT - Control vs. <i>P. gingivalis</i> :TNZT - Control  | -1,612        | -3,783 to 0,5597          | No         | ns         | 0,5784        |
| <i>S. gordonii</i> :TNZT - Control vs. <i>P. gingivalis</i> :TNZT - CaP      | -1,097        | -3,268 to 1,075           | No         | ns         | 0,9943        |
| <i>S. gordonii</i> :TNZT - Control vs. <i>P. gingivalis</i> :TNZT - CaPAg    | -1,847        | -4,018 to 0,3247          | No         | ns         | 0,2608        |
| <i>S. gordonii</i> :TNZT - Control vs. <i>P. gingivalis</i> :TNZT - HF       | -1,172        | -3,343 to 0,9997          | No         | ns         | 0,9837        |
| <i>S. gordonii</i> :TNZT - Control vs. <i>P. gingivalis</i> :TNZT - HFAG     | -1,374        | -3,652 to 0,9030          | No         | ns         | 0,9283        |
| <i>S. gordonii</i> :TNZT - CaP vs. <i>S. gordonii</i> :TNZT - CaPAg          | -1,101        | -3,378 to 1,176           | No         | ns         | 0,9974        |
| <i>S. gordonii</i> :TNZT - CaP vs. <i>S. gordonii</i> :TNZT - HF             | -0,6593       | -2,937 to 1,618           | No         | ns         | >0,9999       |
| <i>S. gordonii</i> :TNZT - CaP vs. <i>S. gordonii</i> :TNZT - HFAG           | -0,7977       | -3,075 to 1,480           | No         | ns         | >0,9999       |
| <i>S. gordonii</i> :TNZT - CaP vs. <i>S. sanguinis</i> :TAV - Control        | -1,758        | -4,035 to 0,5197          | No         | ns         | 0,4831        |
| <i>S. gordonii</i> :TNZT - CaP vs. <i>S. sanguinis</i> :TAV - CaP            | -2,008        | -4,285 to 0,2697          | No         | ns         | 0,1941        |
| <i>S. gordonii</i> :TNZT - CaP vs. <i>S. sanguinis</i> :TAV - CaPAg          | -1,834        | -4,112 to 0,4430          | No         | ns         | 0,3800        |
| <i>S. gordonii</i> :TNZT - CaP vs. <i>S. sanguinis</i> :TAV - HF             | -2,054        | -4,332 to 0,2230          | No         | ns         | 0,1575        |
| <i>S. gordonii</i> :TNZT - CaP vs. <i>S. sanguinis</i> :TAV - HFAG           | -1,793        | -4,070 to 0,4847          | No         | ns         | 0,4349        |
| <i>S. gordonii</i> :TNZT - CaP vs. <i>S. sanguinis</i> :TNZT - Control       | -1,808        | -4,085 to 0,4697          | No         | ns         | 0,4148        |
| <b><i>S. gordonii</i>:TNZT - CaP vs. <i>S. sanguinis</i>:TNZT - CaP</b>      | <b>-2,673</b> | <b>-4,950 to -0,3953</b>  | <b>Yes</b> | <b>**</b>  | <b>0,0040</b> |
| <i>S. gordonii</i> :TNZT - CaP vs. <i>S. sanguinis</i> :TNZT - CaPAg         | -2,264        | -4,542 to 0,01304         | No         | ns         | 0,0538        |
| <i>S. gordonii</i> :TNZT - CaP vs. <i>S. sanguinis</i> :TNZT - HF            | -2,034        | -4,413 to 0,3446          | No         | ns         | 0,2500        |
| <i>S. gordonii</i> :TNZT - CaP vs. <i>S. sanguinis</i> :TNZT - HFAG          | -2,166        | -4,545 to 0,2126          | No         | ns         | 0,1438        |
| <i>S. gordonii</i> :TNZT - CaP vs. <i>A. naeslundii</i> :TAV - Control       | -0,7560       | -3,033 to 1,521           | No         | ns         | >0,9999       |
| <i>S. gordonii</i> :TNZT - CaP vs. <i>A. naeslundii</i> :TAV - CaP           | 0,1440        | -2,379 to 2,667           | No         | ns         | >0,9999       |
| <i>S. gordonii</i> :TNZT - CaP vs. <i>A. naeslundii</i> :TAV - CaPAg         | -0,8127       | -3,090 to 1,465           | No         | ns         | >0,9999       |
| <i>S. gordonii</i> :TNZT - CaP vs. <i>A. naeslundii</i> :TAV - HF            | -0,7977       | -3,075 to 1,480           | No         | ns         | >0,9999       |
| <i>S. gordonii</i> :TNZT - CaP vs. <i>A. naeslundii</i> :TAV - HFAG          | -0,6010       | -2,878 to 1,676           | No         | ns         | >0,9999       |
| <i>S. gordonii</i> :TNZT - CaP vs. <i>A. naeslundii</i> :TNZT - Control      | -0,8393       | -3,117 to 1,438           | No         | ns         | >0,9999       |
| <i>S. gordonii</i> :TNZT - CaP vs. <i>A. naeslundii</i> :TNZT - CaP          | -0,7560       | -3,033 to 1,521           | No         | ns         | >0,9999       |
| <i>S. gordonii</i> :TNZT - CaP vs. <i>A. naeslundii</i> :TNZT - CaPAg        | -0,9343       | -3,212 to 1,343           | No         | ns         | >0,9999       |
| <i>S. gordonii</i> :TNZT - CaP vs. <i>A. naeslundii</i> :TNZT - HF           | -0,3860       | -2,663 to 1,891           | No         | ns         | >0,9999       |
| <i>S. gordonii</i> :TNZT - CaP vs. <i>A. naeslundii</i> :TNZT - HFAG         | -1,104        | -3,626 to 1,419           | No         | ns         | 0,9996        |
| <i>S. gordonii</i> :TNZT - CaP vs. <i>P. gingivalis</i> :TAV - Control       | -1,589        | -3,867 to 0,6880          | No         | ns         | 0,7177        |
| <b><i>S. gordonii</i>:TNZT - CaP vs. <i>P. gingivalis</i>:TAV - CaP</b>      | <b>-2,744</b> | <b>-5,022 to -0,4670</b>  | <b>Yes</b> | <b>**</b>  | <b>0,0024</b> |
| <b><i>S. gordonii</i>:TNZT - CaP vs. <i>P. gingivalis</i>:TAV - CaPAg</b>    | <b>-2,853</b> | <b>-5,130 to -0,5753</b>  | <b>Yes</b> | <b>**</b>  | <b>0,0011</b> |
| <i>S. gordonii</i> :TNZT - CaP vs. <i>P. gingivalis</i> :TAV - HF            | -2,024        | -4,302 to 0,2530          | No         | ns         | 0,1804        |
| <b><i>S. gordonii</i>:TNZT - CaP vs. <i>P. gingivalis</i>:TAV - HFAG</b>     | <b>-2,534</b> | <b>-4,913 to -0,1554</b>  | <b>Yes</b> | <b>*</b>   | <b>0,0207</b> |
| <b><i>S. gordonii</i>:TNZT - CaP vs. <i>P. gingivalis</i>:TNZT - Control</b> | <b>-2,749</b> | <b>-5,027 to -0,4720</b>  | <b>Yes</b> | <b>**</b>  | <b>0,0023</b> |
| <i>S. gordonii</i> :TNZT - CaP vs. <i>P. gingivalis</i> :TNZT - CaP          | -2,234        | -4,512 to 0,04304         | No         | ns         | 0,0635        |
| <b><i>S. gordonii</i>:TNZT - CaP vs. <i>P. gingivalis</i>:TNZT - CaPAg</b>   | <b>-2,984</b> | <b>-5,262 to -0,7070</b>  | <b>Yes</b> | <b>***</b> | <b>0,0004</b> |
| <b><i>S. gordonii</i>:TNZT - CaP vs. <i>P. gingivalis</i>:TNZT - HF</b>      | <b>-2,309</b> | <b>-4,587 to -0,03196</b> | <b>Yes</b> | <b>*</b>   | <b>0,0417</b> |
| <b><i>S. gordonii</i>:TNZT - CaP vs. <i>P. gingivalis</i>:TNZT - HFAG</b>    | <b>-2,512</b> | <b>-4,891 to -0,1334</b>  | <b>Yes</b> | <b>*</b>   | <b>0,0235</b> |
| <i>S. gordonii</i> :TNZT - CaPAg vs. <i>S. gordonii</i> :TNZT - HF           | 0,4417        | -1,730 to 2,613           | No         | ns         | >0,9999       |
| <i>S. gordonii</i> :TNZT - CaPAg vs. <i>S. gordonii</i> :TNZT - HFAG         | 0,3033        | -1,868 to 2,475           | No         | ns         | >0,9999       |
| <i>S. gordonii</i> :TNZT - CaPAg vs. <i>S. sanguinis</i> :TAV - Control      | -0,6567       | -2,828 to 1,515           | No         | ns         | >0,9999       |
| <i>S. gordonii</i> :TNZT - CaPAg vs. <i>S. sanguinis</i> :TAV - CaP          | -0,9067       | -3,078 to 1,265           | No         | ns         | 0,9999        |
| <i>S. gordonii</i> :TNZT - CaPAg vs. <i>S. sanguinis</i> :TAV - CaPAg        | -0,7333       | -2,905 to 1,438           | No         | ns         | >0,9999       |

|                                                                           |               |                           |            |          |               |
|---------------------------------------------------------------------------|---------------|---------------------------|------------|----------|---------------|
| <i>S. gordonii</i> :TNZT - CaPAg vs. <i>S. sanguinis</i> :TAV - HF        | -0,9533       | -3,125 to 1,218           | No         | ns       | 0,9996        |
| <i>S. gordonii</i> :TNZT - CaPAg vs. <i>S. sanguinis</i> :TAV - HFAg      | -0,6917       | -2,863 to 1,480           | No         | ns       | >0,9999       |
| <i>S. gordonii</i> :TNZT - CaPAg vs. <i>S. sanguinis</i> :TNZT - Control  | -0,7067       | -2,878 to 1,465           | No         | ns       | >0,9999       |
| <i>S. gordonii</i> :TNZT - CaPAg vs. <i>S. sanguinis</i> :TNZT - CaP      | -1,572        | -3,743 to 0,5997          | No         | ns       | 0,6377        |
| <i>S. gordonii</i> :TNZT - CaPAg vs. <i>S. sanguinis</i> :TNZT - CaPAg    | -1,163        | -3,335 to 1,008           | No         | ns       | 0,9854        |
| <i>S. gordonii</i> :TNZT - CaPAg vs. <i>S. sanguinis</i> :TNZT - HF       | -0,9330       | -3,210 to 1,344           | No         | ns       | >0,9999       |
| <i>S. gordonii</i> :TNZT - CaPAg vs. <i>S. sanguinis</i> :TNZT - HFAg     | -1,065        | -3,342 to 1,212           | No         | ns       | 0,9986        |
| <i>S. gordonii</i> :TNZT - CaPAg vs. <i>A. naeslundii</i> :TAV - Control  | 0,3450        | -1,826 to 2,516           | No         | ns       | >0,9999       |
| <i>S. gordonii</i> :TNZT - CaPAg vs. <i>A. naeslundii</i> :TAV - CaP      | 1,245         | -1,183 to 3,673           | No         | ns       | 0,9927        |
| <i>S. gordonii</i> :TNZT - CaPAg vs. <i>A. naeslundii</i> :TAV - CaPAg    | 0,2883        | -1,883 to 2,460           | No         | ns       | >0,9999       |
| <i>S. gordonii</i> :TNZT - CaPAg vs. <i>A. naeslundii</i> :TAV - HF       | 0,3033        | -1,868 to 2,475           | No         | ns       | >0,9999       |
| <i>S. gordonii</i> :TNZT - CaPAg vs. <i>A. naeslundii</i> :TAV - HFAg     | 0,5000        | -1,671 to 2,671           | No         | ns       | >0,9999       |
| <i>S. gordonii</i> :TNZT - CaPAg vs. <i>A. naeslundii</i> :TNZT - Control | 0,2617        | -1,910 to 2,433           | No         | ns       | >0,9999       |
| <i>S. gordonii</i> :TNZT - CaPAg vs. <i>A. naeslundii</i> :TNZT - CaP     | 0,3450        | -1,826 to 2,516           | No         | ns       | >0,9999       |
| <i>S. gordonii</i> :TNZT - CaPAg vs. <i>A. naeslundii</i> :TNZT - CaPAg   | 0,1667        | -2,005 to 2,338           | No         | ns       | >0,9999       |
| <i>S. gordonii</i> :TNZT - CaPAg vs. <i>A. naeslundii</i> :TNZT - HF      | 0,7150        | -1,456 to 2,886           | No         | ns       | >0,9999       |
| <i>S. gordonii</i> :TNZT - CaPAg vs. <i>A. naeslundii</i> :TNZT - HFAg    | -0,002500     | -2,430 to 2,425           | No         | ns       | >0,9999       |
| <i>S. gordonii</i> :TNZT - CaPAg vs. <i>P. gingivalis</i> :TAV - Control  | -0,4883       | -2,660 to 1,683           | No         | ns       | >0,9999       |
| <i>S. gordonii</i> :TNZT - CaPAg vs. <i>P. gingivalis</i> :TAV - CaP      | -1,643        | -3,815 to 0,5281          | No         | ns       | 0,5312        |
| <i>S. gordonii</i> :TNZT - CaPAg vs. <i>P. gingivalis</i> :TAV - CaPAg    | -1,752        | -3,923 to 0,4197          | No         | ns       | 0,3764        |
| <i>S. gordonii</i> :TNZT - CaPAg vs. <i>P. gingivalis</i> :TAV - HF       | -0,9233       | -3,095 to 1,248           | No         | ns       | 0,9998        |
| <i>S. gordonii</i> :TNZT - CaPAg vs. <i>P. gingivalis</i> :TAV - HFAg     | -1,433        | -3,710 to 0,8444          | No         | ns       | 0,8867        |
| <i>S. gordonii</i> :TNZT - CaPAg vs. <i>P. gingivalis</i> :TNZT - Control | -1,648        | -3,820 to 0,5231          | No         | ns       | 0,5238        |
| <i>S. gordonii</i> :TNZT - CaPAg vs. <i>P. gingivalis</i> :TNZT - CaP     | -1,133        | -3,305 to 1,038           | No         | ns       | 0,9902        |
| <i>S. gordonii</i> :TNZT - CaPAg vs. <i>P. gingivalis</i> :TNZT - CaPAg   | -1,883        | -4,055 to 0,2881          | No         | ns       | 0,2230        |
| <i>S. gordonii</i> :TNZT - CaPAg vs. <i>P. gingivalis</i> :TNZT - HF      | -1,208        | -3,380 to 0,9631          | No         | ns       | 0,9745        |
| <i>S. gordonii</i> :TNZT - CaPAg vs. <i>P. gingivalis</i> :TNZT - HFAg    | -1,411        | -3,688 to 0,8664          | No         | ns       | 0,9037        |
| <i>S. gordonii</i> :TNZT - HF vs. <i>S. gordonii</i> :TNZT - HFAg         | -0,1383       | -2,310 to 2,033           | No         | ns       | >0,9999       |
| <i>S. gordonii</i> :TNZT - HF vs. <i>S. sanguinis</i> :TAV - Control      | -1,098        | -3,270 to 1,073           | No         | ns       | 0,9942        |
| <i>S. gordonii</i> :TNZT - HF vs. <i>S. sanguinis</i> :TAV - CaP          | -1,348        | -3,520 to 0,8231          | No         | ns       | 0,9014        |
| <i>S. gordonii</i> :TNZT - HF vs. <i>S. sanguinis</i> :TAV - CaPAg        | -1,175        | -3,346 to 0,9964          | No         | ns       | 0,9830        |
| <i>S. gordonii</i> :TNZT - HF vs. <i>S. sanguinis</i> :TAV - HF           | -1,395        | -3,566 to 0,7764          | No         | ns       | 0,8604        |
| <i>S. gordonii</i> :TNZT - HF vs. <i>S. sanguinis</i> :TAV - HFAg         | -1,133        | -3,305 to 1,038           | No         | ns       | 0,9902        |
| <i>S. gordonii</i> :TNZT - HF vs. <i>S. sanguinis</i> :TNZT - Control     | -1,148        | -3,320 to 1,023           | No         | ns       | 0,9880        |
| <i>S. gordonii</i> :TNZT - HF vs. <i>S. sanguinis</i> :TNZT - CaP         | -2,013        | -4,185 to 0,1581          | No         | ns       | 0,1199        |
| <i>S. gordonii</i> :TNZT - HF vs. <i>S. sanguinis</i> :TNZT - CaPAg       | -1,605        | -3,776 to 0,5664          | No         | ns       | 0,5884        |
| <i>S. gordonii</i> :TNZT - HF vs. <i>S. sanguinis</i> :TNZT - HF          | -1,375        | -3,652 to 0,9027          | No         | ns       | 0,9281        |
| <i>S. gordonii</i> :TNZT - HF vs. <i>S. sanguinis</i> :TNZT - HFAg        | -1,507        | -3,784 to 0,7707          | No         | ns       | 0,8168        |
| <i>S. gordonii</i> :TNZT - HF vs. <i>A. naeslundii</i> :TAV - Control     | -0,09667      | -2,268 to 2,075           | No         | ns       | >0,9999       |
| <i>S. gordonii</i> :TNZT - HF vs. <i>A. naeslundii</i> :TAV - CaP         | 0,8033        | -1,624 to 3,231           | No         | ns       | >0,9999       |
| <i>S. gordonii</i> :TNZT - HF vs. <i>A. naeslundii</i> :TAV - CaPAg       | -0,1533       | -2,325 to 2,018           | No         | ns       | >0,9999       |
| <i>S. gordonii</i> :TNZT - HF vs. <i>A. naeslundii</i> :TAV - HF          | -0,1383       | -2,310 to 2,033           | No         | ns       | >0,9999       |
| <i>S. gordonii</i> :TNZT - HF vs. <i>A. naeslundii</i> :TAV - HFAg        | 0,05833       | -2,113 to 2,230           | No         | ns       | >0,9999       |
| <i>S. gordonii</i> :TNZT - HF vs. <i>A. naeslundii</i> :TNZT - Control    | -0,1800       | -2,351 to 1,991           | No         | ns       | >0,9999       |
| <i>S. gordonii</i> :TNZT - HF vs. <i>A. naeslundii</i> :TNZT - CaP        | -0,09667      | -2,268 to 2,075           | No         | ns       | >0,9999       |
| <i>S. gordonii</i> :TNZT - HF vs. <i>A. naeslundii</i> :TNZT - CaPAg      | -0,2750       | -2,446 to 1,896           | No         | ns       | >0,9999       |
| <i>S. gordonii</i> :TNZT - HF vs. <i>A. naeslundii</i> :TNZT - HF         | 0,2733        | -1,898 to 2,445           | No         | ns       | >0,9999       |
| <i>S. gordonii</i> :TNZT - HF vs. <i>A. naeslundii</i> :TNZT - HFAg       | -0,4442       | -2,872 to 1,984           | No         | ns       | >0,9999       |
| <i>S. gordonii</i> :TNZT - HF vs. <i>P. gingivalis</i> :TAV - Control     | -0,9300       | -3,101 to 1,241           | No         | ns       | 0,9998        |
| <i>S. gordonii</i> :TNZT - HF vs. <i>P. gingivalis</i> :TAV - CaP         | -2,085        | -4,256 to 0,08639         | No         | ns       | 0,0819        |
| <b><i>S. gordonii</i>:TNZT - HF vs. <i>P. gingivalis</i>:TAV - CaPAg</b>  | <b>-2,193</b> | <b>-4,365 to -0,02194</b> | <b>Yes</b> | <b>*</b> | <b>0,0439</b> |
| <i>S. gordonii</i> :TNZT - HF vs. <i>P. gingivalis</i> :TAV - HF          | -1,365        | -3,536 to 0,8064          | No         | ns       | 0,8878        |
| <i>S. gordonii</i> :TNZT - HF vs. <i>P. gingivalis</i> :TAV - HFAg        | -1,875        | -4,152 to 0,4027          | No         | ns       | 0,3302        |
| <i>S. gordonii</i> :TNZT - HF vs. <i>P. gingivalis</i> :TNZT - Control    | -2,090        | -4,261 to 0,08139         | No         | ns       | 0,0797        |
| <i>S. gordonii</i> :TNZT - HF vs. <i>P. gingivalis</i> :TNZT - CaP        | -1,575        | -3,746 to 0,5964          | No         | ns       | 0,6328        |
| <b><i>S. gordonii</i>:TNZT - HF vs. <i>P. gingivalis</i>:TNZT - CaPAg</b> | <b>-2,325</b> | <b>-4,496 to -0,1536</b>  | <b>Yes</b> | <b>*</b> | <b>0,0191</b> |
| <i>S. gordonii</i> :TNZT - HF vs. <i>P. gingivalis</i> :TNZT - HF         | -1,650        | -3,821 to 0,5214          | No         | ns       | 0,5213        |
| <i>S. gordonii</i> :TNZT - HF vs. <i>P. gingivalis</i> :TNZT - HFAg       | -1,853        | -4,130 to 0,4247          | No         | ns       | 0,3569        |
| <i>S. gordonii</i> :TNZT - HFAg vs. <i>S. sanguinis</i> :TAV - Control    | -0,9600       | -3,131 to 1,211           | No         | ns       | 0,9995        |
| <i>S. gordonii</i> :TNZT - HFAg vs. <i>S. sanguinis</i> :TAV - CaP        | -1,210        | -3,381 to 0,9614          | No         | ns       | 0,9741        |
| <i>S. gordonii</i> :TNZT - HFAg vs. <i>S. sanguinis</i> :TAV - CaPAg      | -1,037        | -3,208 to 1,135           | No         | ns       | 0,9979        |
| <i>S. gordonii</i> :TNZT - HFAg vs. <i>S. sanguinis</i> :TAV - HF         | -1,257        | -3,428 to 0,9147          | No         | ns       | 0,9569        |
| <i>S. gordonii</i> :TNZT - HFAg vs. <i>S. sanguinis</i> :TAV - HFAg       | -0,9950       | -3,166 to 1,176           | No         | ns       | 0,9990        |
| <i>S. gordonii</i> :TNZT - HFAg vs. <i>S. sanguinis</i> :TNZT - Control   | -1,010        | -3,181 to 1,161           | No         | ns       | 0,9987        |
| <i>S. gordonii</i> :TNZT - HFAg vs. <i>S. sanguinis</i> :TNZT - CaP       | -1,875        | -4,046 to 0,2964          | No         | ns       | 0,2312        |
| <i>S. gordonii</i> :TNZT - HFAg vs. <i>S. sanguinis</i> :TNZT - CaPAg     | -1,467        | -3,638 to 0,7047          | No         | ns       | 0,7812        |
| <i>S. gordonii</i> :TNZT - HFAg vs. <i>S. sanguinis</i> :TNZT - HF        | -1,236        | -3,514 to 1,041           | No         | ns       | 0,9822        |
| <i>S. gordonii</i> :TNZT - HFAg vs. <i>S. sanguinis</i> :TNZT - HFAg      | -1,368        | -3,646 to 0,9090          | No         | ns       | 0,9318        |
| <i>S. gordonii</i> :TNZT - HFAg vs. <i>A. naeslundii</i> :TAV - Control   | 0,04167       | -2,130 to 2,213           | No         | ns       | >0,9999       |
| <i>S. gordonii</i> :TNZT - HFAg vs. <i>A. naeslundii</i> :TAV - CaP       | 0,9417        | -1,486 to 3,369           | No         | ns       | >0,9999       |
| <i>S. gordonii</i> :TNZT - HFAg vs. <i>A. naeslundii</i> :TAV - CaPAg     | -0,01500      | -2,186 to 2,156           | No         | ns       | >0,9999       |
| <i>S. gordonii</i> :TNZT - HFAg vs. <i>A. naeslundii</i> :TAV - HF        | 0,000         | -2,171 to 2,171           | No         | ns       | >0,9999       |

|                                                                             |               |                           |            |          |               |
|-----------------------------------------------------------------------------|---------------|---------------------------|------------|----------|---------------|
| <i>S. gordonii</i> :TNZT - HFAg vs. <i>A. naeslundii</i> :TAV - HFAg        | 0,1967        | -1,975 to 2,368           | No         | ns       | >0,9999       |
| <i>S. gordonii</i> :TNZT - HFAg vs. <i>A. naeslundii</i> :TNZT - Control    | -0,04167      | -2,213 to 2,130           | No         | ns       | >0,9999       |
| <i>S. gordonii</i> :TNZT - HFAg vs. <i>A. naeslundii</i> :TNZT - CaP        | 0,04167       | -2,130 to 2,213           | No         | ns       | >0,9999       |
| <i>S. gordonii</i> :TNZT - HFAg vs. <i>A. naeslundii</i> :TNZT - CaPAg      | -0,1367       | -2,308 to 2,035           | No         | ns       | >0,9999       |
| <i>S. gordonii</i> :TNZT - HFAg vs. <i>A. naeslundii</i> :TNZT - HF         | 0,4117        | -1,760 to 2,583           | No         | ns       | >0,9999       |
| <i>S. gordonii</i> :TNZT - HFAg vs. <i>A. naeslundii</i> :TNZT - HFAg       | -0,3058       | -2,734 to 2,122           | No         | ns       | >0,9999       |
| <i>S. gordonii</i> :TNZT - HFAg vs. <i>P. gingivalis</i> :TAV - Control     | -0,7917       | -2,963 to 1,380           | No         | ns       | >0,9999       |
| <i>S. gordonii</i> :TNZT - HFAg vs. <i>P. gingivalis</i> :TAV - CaP         | -1,947        | -4,118 to 0,2247          | No         | ns       | 0,1668        |
| <i>S. gordonii</i> :TNZT - HFAg vs. <i>P. gingivalis</i> :TAV - CaPAg       | -2,055        | -4,226 to 0,1164          | No         | ns       | 0,0964        |
| <i>S. gordonii</i> :TNZT - HFAg vs. <i>P. gingivalis</i> :TAV - HF          | -1,227        | -3,398 to 0,9447          | No         | ns       | 0,9687        |
| <i>S. gordonii</i> :TNZT - HFAg vs. <i>P. gingivalis</i> :TAV - HFAg        | -1,736        | -4,014 to 0,5410          | No         | ns       | 0,5131        |
| <i>S. gordonii</i> :TNZT - HFAg vs. <i>P. gingivalis</i> :TNZT - Control    | -1,952        | -4,123 to 0,2197          | No         | ns       | 0,1629        |
| <i>S. gordonii</i> :TNZT - HFAg vs. <i>P. gingivalis</i> :TNZT - CaP        | -1,437        | -3,608 to 0,7347          | No         | ns       | 0,8166        |
| <b><i>S. gordonii</i>:TNZT - HFAg vs. <i>P. gingivalis</i>:TNZT - CaPAg</b> | <b>-2,187</b> | <b>-4,358 to -0,01528</b> | <b>Yes</b> | <b>*</b> | <b>0,0457</b> |
| <i>S. gordonii</i> :TNZT - HFAg vs. <i>P. gingivalis</i> :TNZT - HF         | -1,512        | -3,683 to 0,6597          | No         | ns       | 0,7228        |
| <i>S. gordonii</i> :TNZT - HFAg vs. <i>P. gingivalis</i> :TNZT - HFAg       | -1,714        | -3,992 to 0,5630          | No         | ns       | 0,5443        |
| <i>S. sanguinis</i> :TAV - Control vs. <i>S. sanguinis</i> :TAV - CaP       | -0,2500       | -2,421 to 1,921           | No         | ns       | >0,9999       |
| <i>S. sanguinis</i> :TAV - Control vs. <i>S. sanguinis</i> :TAV - CaPAg     | -0,07667      | -2,248 to 2,095           | No         | ns       | >0,9999       |
| <i>S. sanguinis</i> :TAV - Control vs. <i>S. sanguinis</i> :TAV - HF        | -0,2967       | -2,468 to 1,875           | No         | ns       | >0,9999       |
| <i>S. sanguinis</i> :TAV - Control vs. <i>S. sanguinis</i> :TAV - HFAg      | -0,03500      | -2,206 to 2,136           | No         | ns       | >0,9999       |
| <i>S. sanguinis</i> :TAV - Control vs. <i>S. sanguinis</i> :TNZT - Control  | -0,05000      | -2,221 to 2,121           | No         | ns       | >0,9999       |
| <i>S. sanguinis</i> :TAV - Control vs. <i>S. sanguinis</i> :TNZT - CaP      | -0,9150       | -3,086 to 1,256           | No         | ns       | 0,9998        |
| <i>S. sanguinis</i> :TAV - Control vs. <i>S. sanguinis</i> :TNZT - CaPAg    | -0,5067       | -2,678 to 1,665           | No         | ns       | >0,9999       |
| <i>S. sanguinis</i> :TAV - Control vs. <i>S. sanguinis</i> :TNZT - HF       | -0,2763       | -2,554 to 2,001           | No         | ns       | >0,9999       |
| <i>S. sanguinis</i> :TAV - Control vs. <i>S. sanguinis</i> :TNZT - HFAg     | -0,4083       | -2,686 to 1,869           | No         | ns       | >0,9999       |
| <i>S. sanguinis</i> :TAV - Control vs. <i>A. naeslundii</i> :TAV - Control  | 1,002         | -1,170 to 3,173           | No         | ns       | 0,9989        |
| <i>S. sanguinis</i> :TAV - Control vs. <i>A. naeslundii</i> :TAV - CaP      | 1,902         | -0,5260 to 4,329          | No         | ns       | 0,4468        |
| <i>S. sanguinis</i> :TAV - Control vs. <i>A. naeslundii</i> :TAV - CaPAg    | 0,9450        | -1,226 to 3,116           | No         | ns       | 0,9997        |
| <i>S. sanguinis</i> :TAV - Control vs. <i>A. naeslundii</i> :TAV - HF       | 0,9600        | -1,211 to 3,131           | No         | ns       | 0,9995        |
| <i>S. sanguinis</i> :TAV - Control vs. <i>A. naeslundii</i> :TAV - HFAg     | 1,157         | -1,015 to 3,328           | No         | ns       | 0,9866        |
| <i>S. sanguinis</i> :TAV - Control vs. <i>A. naeslundii</i> :TNZT - Control | 0,9183        | -1,253 to 3,090           | No         | ns       | 0,9998        |
| <i>S. sanguinis</i> :TAV - Control vs. <i>A. naeslundii</i> :TNZT - CaP     | 1,002         | -1,170 to 3,173           | No         | ns       | 0,9989        |
| <i>S. sanguinis</i> :TAV - Control vs. <i>A. naeslundii</i> :TNZT - CaPAg   | 0,8233        | -1,348 to 2,995           | No         | ns       | >0,9999       |
| <i>S. sanguinis</i> :TAV - Control vs. <i>A. naeslundii</i> :TNZT - HF      | 1,372         | -0,7997 to 3,543          | No         | ns       | 0,8820        |
| <i>S. sanguinis</i> :TAV - Control vs. <i>A. naeslundii</i> :TNZT - HFAg    | 0,6542        | -1,774 to 3,082           | No         | ns       | >0,9999       |
| <i>S. sanguinis</i> :TAV - Control vs. <i>P. gingivalis</i> :TAV - Control  | 0,1683        | -2,003 to 2,340           | No         | ns       | >0,9999       |
| <i>S. sanguinis</i> :TAV - Control vs. <i>P. gingivalis</i> :TAV - CaP      | -0,9867       | -3,158 to 1,185           | No         | ns       | 0,9992        |
| <i>S. sanguinis</i> :TAV - Control vs. <i>P. gingivalis</i> :TAV - CaPAg    | -1,095        | -3,266 to 1,076           | No         | ns       | 0,9945        |
| <i>S. sanguinis</i> :TAV - Control vs. <i>P. gingivalis</i> :TAV - HF       | -0,2667       | -2,438 to 1,905           | No         | ns       | >0,9999       |
| <i>S. sanguinis</i> :TAV - Control vs. <i>P. gingivalis</i> :TAV - HFAg     | -0,7763       | -3,054 to 1,501           | No         | ns       | >0,9999       |
| <i>S. sanguinis</i> :TAV - Control vs. <i>P. gingivalis</i> :TNZT - Control | -0,9917       | -3,163 to 1,180           | No         | ns       | 0,9991        |
| <i>S. sanguinis</i> :TAV - Control vs. <i>P. gingivalis</i> :TNZT - CaP     | -0,4767       | -2,648 to 1,695           | No         | ns       | >0,9999       |
| <i>S. sanguinis</i> :TAV - Control vs. <i>P. gingivalis</i> :TNZT - CaPAg   | -1,227        | -3,398 to 0,9447          | No         | ns       | 0,9687        |
| <i>S. sanguinis</i> :TAV - Control vs. <i>P. gingivalis</i> :TNZT - HF      | -0,5517       | -2,723 to 1,620           | No         | ns       | >0,9999       |
| <i>S. sanguinis</i> :TAV - Control vs. <i>P. gingivalis</i> :TNZT - HFAg    | -0,7543       | -3,032 to 1,523           | No         | ns       | >0,9999       |
| <i>S. sanguinis</i> :TAV - CaP vs. <i>S. sanguinis</i> :TAV - CaPAg         | 0,1733        | -1,998 to 2,345           | No         | ns       | >0,9999       |
| <i>S. sanguinis</i> :TAV - CaP vs. <i>S. sanguinis</i> :TAV - HF            | -0,04667      | -2,218 to 2,125           | No         | ns       | >0,9999       |
| <i>S. sanguinis</i> :TAV - CaP vs. <i>S. sanguinis</i> :TAV - HFAg          | 0,2150        | -1,956 to 2,386           | No         | ns       | >0,9999       |
| <i>S. sanguinis</i> :TAV - CaP vs. <i>S. sanguinis</i> :TNZT - Control      | 0,2000        | -1,971 to 2,371           | No         | ns       | >0,9999       |
| <i>S. sanguinis</i> :TAV - CaP vs. <i>S. sanguinis</i> :TNZT - CaP          | -0,6650       | -2,836 to 1,506           | No         | ns       | >0,9999       |
| <i>S. sanguinis</i> :TAV - CaP vs. <i>S. sanguinis</i> :TNZT - CaPAg        | -0,2567       | -2,428 to 1,915           | No         | ns       | >0,9999       |
| <i>S. sanguinis</i> :TAV - CaP vs. <i>S. sanguinis</i> :TNZT - HF           | -0,02633      | -2,304 to 2,251           | No         | ns       | >0,9999       |
| <i>S. sanguinis</i> :TAV - CaP vs. <i>S. sanguinis</i> :TNZT - HFAg         | -0,1583       | -2,436 to 2,119           | No         | ns       | >0,9999       |
| <i>S. sanguinis</i> :TAV - CaP vs. <i>A. naeslundii</i> :TAV - Control      | 1,252         | -0,9197 to 3,423          | No         | ns       | 0,9591        |
| <i>S. sanguinis</i> :TAV - CaP vs. <i>A. naeslundii</i> :TAV - CaP          | 2,152         | -0,2760 to 4,579          | No         | ns       | 0,1852        |
| <i>S. sanguinis</i> :TAV - CaP vs. <i>A. naeslundii</i> :TAV - CaPAg        | 1,195         | -0,9764 to 3,366          | No         | ns       | 0,9783        |
| <i>S. sanguinis</i> :TAV - CaP vs. <i>A. naeslundii</i> :TAV - HF           | 1,210         | -0,9614 to 3,381          | No         | ns       | 0,9741        |
| <i>S. sanguinis</i> :TAV - CaP vs. <i>A. naeslundii</i> :TAV - HFAg         | 1,407         | -0,7647 to 3,578          | No         | ns       | 0,8488        |
| <i>S. sanguinis</i> :TAV - CaP vs. <i>A. naeslundii</i> :TNZT - Control     | 1,168         | -1,003 to 3,340           | No         | ns       | 0,9844        |
| <i>S. sanguinis</i> :TAV - CaP vs. <i>A. naeslundii</i> :TNZT - CaP         | 1,252         | -0,9197 to 3,423          | No         | ns       | 0,9591        |
| <i>S. sanguinis</i> :TAV - CaP vs. <i>A. naeslundii</i> :TNZT - CaPAg       | 1,073         | -1,098 to 3,245           | No         | ns       | 0,9961        |
| <i>S. sanguinis</i> :TAV - CaP vs. <i>A. naeslundii</i> :TNZT - HF          | 1,622         | -0,5497 to 3,793          | No         | ns       | 0,5635        |
| <i>S. sanguinis</i> :TAV - CaP vs. <i>A. naeslundii</i> :TNZT - HFAg        | 0,9042        | -1,524 to 3,332           | No         | ns       | >0,9999       |
| <i>S. sanguinis</i> :TAV - CaP vs. <i>P. gingivalis</i> :TAV - Control      | 0,4183        | -1,753 to 2,590           | No         | ns       | >0,9999       |
| <i>S. sanguinis</i> :TAV - CaP vs. <i>P. gingivalis</i> :TAV - CaP          | -0,7367       | -2,908 to 1,435           | No         | ns       | >0,9999       |
| <i>S. sanguinis</i> :TAV - CaP vs. <i>P. gingivalis</i> :TAV - CaPAg        | -0,8450       | -3,016 to 1,326           | No         | ns       | >0,9999       |
| <i>S. sanguinis</i> :TAV - CaP vs. <i>P. gingivalis</i> :TAV - HF           | -0,01667      | -2,188 to 2,155           | No         | ns       | >0,9999       |
| <i>S. sanguinis</i> :TAV - CaP vs. <i>P. gingivalis</i> :TAV - HFAg         | -0,5263       | -2,804 to 1,751           | No         | ns       | >0,9999       |
| <i>S. sanguinis</i> :TAV - CaP vs. <i>P. gingivalis</i> :TNZT - Control     | -0,7417       | -2,913 to 1,430           | No         | ns       | >0,9999       |
| <i>S. sanguinis</i> :TAV - CaP vs. <i>P. gingivalis</i> :TNZT - CaP         | -0,2267       | -2,398 to 1,945           | No         | ns       | >0,9999       |
| <i>S. sanguinis</i> :TAV - CaP vs. <i>P. gingivalis</i> :TNZT - CaPAg       | -0,9767       | -3,148 to 1,195           | No         | ns       | 0,9993        |
| <i>S. sanguinis</i> :TAV - CaP vs. <i>P. gingivalis</i> :TNZT - HF          | -0,3017       | -2,473 to 1,870           | No         | ns       | >0,9999       |

|                                                                           |          |                  |    |    |         |
|---------------------------------------------------------------------------|----------|------------------|----|----|---------|
| <i>S. sanguinis</i> :TAV - CaP vs. <i>P. gingivalis</i> :TNZT - HFAg      | -0,5043  | -2,782 to 1,773  | No | ns | >0,9999 |
| <i>S. sanguinis</i> :TAV - CaPAg vs. <i>S. sanguinis</i> :TAV - HF        | -0,2200  | -2,391 to 1,951  | No | ns | >0,9999 |
| <i>S. sanguinis</i> :TAV - CaPAg vs. <i>S. sanguinis</i> :TAV - HFAg      | 0,04167  | -2,130 to 2,213  | No | ns | >0,9999 |
| <i>S. sanguinis</i> :TAV - CaPAg vs. <i>S. sanguinis</i> :TNZT - Control  | 0,02667  | -2,145 to 2,198  | No | ns | >0,9999 |
| <i>S. sanguinis</i> :TAV - CaPAg vs. <i>S. sanguinis</i> :TNZT - CaP      | -0,8383  | -3,010 to 1,333  | No | ns | >0,9999 |
| <i>S. sanguinis</i> :TAV - CaPAg vs. <i>S. sanguinis</i> :TNZT - CaPAg    | -0,4300  | -2,601 to 1,741  | No | ns | >0,9999 |
| <i>S. sanguinis</i> :TAV - CaPAg vs. <i>S. sanguinis</i> :TNZT - HF       | -0,1997  | -2,477 to 2,078  | No | ns | >0,9999 |
| <i>S. sanguinis</i> :TAV - CaPAg vs. <i>S. sanguinis</i> :TNZT - HFAg     | -0,3317  | -2,609 to 1,946  | No | ns | >0,9999 |
| <i>S. sanguinis</i> :TAV - CaPAg vs. <i>A. naeslundii</i> :TAV - Control  | 1,078    | -1,093 to 3,250  | No | ns | 0,9957  |
| <i>S. sanguinis</i> :TAV - CaPAg vs. <i>A. naeslundii</i> :TAV - CaP      | 1,978    | -0,4494 to 4,406 | No | ns | 0,3530  |
| <i>S. sanguinis</i> :TAV - CaPAg vs. <i>A. naeslundii</i> :TAV - CaPAg    | 1,022    | -1,150 to 3,193  | No | ns | 0,9984  |
| <i>S. sanguinis</i> :TAV - CaPAg vs. <i>A. naeslundii</i> :TAV - HF       | 1,037    | -1,135 to 3,208  | No | ns | 0,9979  |
| <i>S. sanguinis</i> :TAV - CaPAg vs. <i>A. naeslundii</i> :TAV - HFAg     | 1,233    | -0,9381 to 3,405 | No | ns | 0,9663  |
| <i>S. sanguinis</i> :TAV - CaPAg vs. <i>A. naeslundii</i> :TNZT - Control | 0,9950   | -1,176 to 3,166  | No | ns | 0,9990  |
| <i>S. sanguinis</i> :TAV - CaPAg vs. <i>A. naeslundii</i> :TNZT - CaP     | 1,078    | -1,093 to 3,250  | No | ns | 0,9957  |
| <i>S. sanguinis</i> :TAV - CaPAg vs. <i>A. naeslundii</i> :TNZT - CaPAg   | 0,9000   | -1,271 to 3,071  | No | ns | 0,9999  |
| <i>S. sanguinis</i> :TAV - CaPAg vs. <i>A. naeslundii</i> :TNZT - HF      | 1,448    | -0,7231 to 3,620 | No | ns | 0,8032  |
| <i>S. sanguinis</i> :TAV - CaPAg vs. <i>A. naeslundii</i> :TNZT - HFAg    | 0,7308   | -1,697 to 3,159  | No | ns | >0,9999 |
| <i>S. sanguinis</i> :TAV - CaPAg vs. <i>P. gingivalis</i> :TAV - Control  | 0,2450   | -1,926 to 2,416  | No | ns | >0,9999 |
| <i>S. sanguinis</i> :TAV - CaPAg vs. <i>P. gingivalis</i> :TAV - CaP      | -0,9100  | -3,081 to 1,261  | No | ns | 0,9998  |
| <i>S. sanguinis</i> :TAV - CaPAg vs. <i>P. gingivalis</i> :TAV - CaPAg    | -1,018   | -3,190 to 1,153  | No | ns | 0,9985  |
| <i>S. sanguinis</i> :TAV - CaPAg vs. <i>P. gingivalis</i> :TAV - HF       | -0,1900  | -2,361 to 1,981  | No | ns | >0,9999 |
| <i>S. sanguinis</i> :TAV - CaPAg vs. <i>P. gingivalis</i> :TAV - HFAg     | -0,6997  | -2,977 to 1,578  | No | ns | >0,9999 |
| <i>S. sanguinis</i> :TAV - CaPAg vs. <i>P. gingivalis</i> :TNZT - Control | -0,9150  | -3,086 to 1,256  | No | ns | 0,9998  |
| <i>S. sanguinis</i> :TAV - CaPAg vs. <i>P. gingivalis</i> :TNZT - CaP     | -0,4000  | -2,571 to 1,771  | No | ns | >0,9999 |
| <i>S. sanguinis</i> :TAV - CaPAg vs. <i>P. gingivalis</i> :TNZT - CaPAg   | -1,150   | -3,321 to 1,021  | No | ns | 0,9877  |
| <i>S. sanguinis</i> :TAV - CaPAg vs. <i>P. gingivalis</i> :TNZT - HF      | -0,4750  | -2,646 to 1,696  | No | ns | >0,9999 |
| <i>S. sanguinis</i> :TAV - CaPAg vs. <i>P. gingivalis</i> :TNZT - HFAg    | -0,6777  | -2,955 to 1,600  | No | ns | >0,9999 |
| <i>S. sanguinis</i> :TAV - HF vs. <i>S. sanguinis</i> :TAV - HFAg         | 0,2617   | -1,910 to 2,433  | No | ns | >0,9999 |
| <i>S. sanguinis</i> :TAV - HF vs. <i>S. sanguinis</i> :TNZT - Control     | 0,2467   | -1,925 to 2,418  | No | ns | >0,9999 |
| <i>S. sanguinis</i> :TAV - HF vs. <i>S. sanguinis</i> :TNZT - CaP         | -0,6183  | -2,790 to 1,553  | No | ns | >0,9999 |
| <i>S. sanguinis</i> :TAV - HF vs. <i>S. sanguinis</i> :TNZT - CaPAg       | -0,2100  | -2,381 to 1,961  | No | ns | >0,9999 |
| <i>S. sanguinis</i> :TAV - HF vs. <i>S. sanguinis</i> :TNZT - HF          | 0,02033  | -2,257 to 2,298  | No | ns | >0,9999 |
| <i>S. sanguinis</i> :TAV - HF vs. <i>S. sanguinis</i> :TNZT - HFAg        | -0,1117  | -2,389 to 2,166  | No | ns | >0,9999 |
| <i>S. sanguinis</i> :TAV - HF vs. <i>A. naeslundii</i> :TAV - Control     | 1,298    | -0,8731 to 3,470 | No | ns | 0,9356  |
| <i>S. sanguinis</i> :TAV - HF vs. <i>A. naeslundii</i> :TAV - CaP         | 2,198    | -0,2294 to 4,626 | No | ns | 0,1518  |
| <i>S. sanguinis</i> :TAV - HF vs. <i>A. naeslundii</i> :TAV - CaPAg       | 1,242    | -0,9297 to 3,413 | No | ns | 0,9632  |
| <i>S. sanguinis</i> :TAV - HF vs. <i>A. naeslundii</i> :TAV - HF          | 1,257    | -0,9147 to 3,428 | No | ns | 0,9569  |
| <i>S. sanguinis</i> :TAV - HF vs. <i>A. naeslundii</i> :TAV - HFAg        | 1,453    | -0,7181 to 3,625 | No | ns | 0,7973  |
| <i>S. sanguinis</i> :TAV - HF vs. <i>A. naeslundii</i> :TNZT - Control    | 1,215    | -0,9564 to 3,386 | No | ns | 0,9725  |
| <i>S. sanguinis</i> :TAV - HF vs. <i>A. naeslundii</i> :TNZT - CaP        | 1,298    | -0,8731 to 3,470 | No | ns | 0,9356  |
| <i>S. sanguinis</i> :TAV - HF vs. <i>A. naeslundii</i> :TNZT - CaPAg      | 1,120    | -1,051 to 3,291  | No | ns | 0,9919  |
| <i>S. sanguinis</i> :TAV - HF vs. <i>A. naeslundii</i> :TNZT - HF         | 1,668    | -0,5031 to 3,840 | No | ns | 0,4942  |
| <i>S. sanguinis</i> :TAV - HF vs. <i>A. naeslundii</i> :TNZT - HFAg       | 0,9508   | -1,477 to 3,379  | No | ns | >0,9999 |
| <i>S. sanguinis</i> :TAV - HF vs. <i>P. gingivalis</i> :TAV - Control     | 0,4650   | -1,706 to 2,636  | No | ns | >0,9999 |
| <i>S. sanguinis</i> :TAV - HF vs. <i>P. gingivalis</i> :TAV - CaP         | -0,6900  | -2,861 to 1,481  | No | ns | >0,9999 |
| <i>S. sanguinis</i> :TAV - HF vs. <i>P. gingivalis</i> :TAV - CaPAg       | -0,7983  | -2,970 to 1,373  | No | ns | >0,9999 |
| <i>S. sanguinis</i> :TAV - HF vs. <i>P. gingivalis</i> :TAV - HF          | 0,03000  | -2,141 to 2,201  | No | ns | >0,9999 |
| <i>S. sanguinis</i> :TAV - HF vs. <i>P. gingivalis</i> :TAV - HFAg        | -0,4797  | -2,757 to 1,798  | No | ns | >0,9999 |
| <i>S. sanguinis</i> :TAV - HF vs. <i>P. gingivalis</i> :TNZT - Control    | -0,6950  | -2,866 to 1,476  | No | ns | >0,9999 |
| <i>S. sanguinis</i> :TAV - HF vs. <i>P. gingivalis</i> :TNZT - CaP        | -0,1800  | -2,351 to 1,991  | No | ns | >0,9999 |
| <i>S. sanguinis</i> :TAV - HF vs. <i>P. gingivalis</i> :TNZT - CaPAg      | -0,9300  | -3,101 to 1,241  | No | ns | 0,9998  |
| <i>S. sanguinis</i> :TAV - HF vs. <i>P. gingivalis</i> :TNZT - HF         | -0,2550  | -2,426 to 1,916  | No | ns | >0,9999 |
| <i>S. sanguinis</i> :TAV - HF vs. <i>P. gingivalis</i> :TNZT - HFAg       | -0,4577  | -2,735 to 1,820  | No | ns | >0,9999 |
| <i>S. sanguinis</i> :TAV - HFAg vs. <i>S. sanguinis</i> :TNZT - Control   | -0,01500 | -2,186 to 2,156  | No | ns | >0,9999 |
| <i>S. sanguinis</i> :TAV - HFAg vs. <i>S. sanguinis</i> :TNZT - CaP       | -0,8800  | -3,051 to 1,291  | No | ns | >0,9999 |
| <i>S. sanguinis</i> :TAV - HFAg vs. <i>S. sanguinis</i> :TNZT - CaPAg     | -0,4717  | -2,643 to 1,700  | No | ns | >0,9999 |
| <i>S. sanguinis</i> :TAV - HFAg vs. <i>S. sanguinis</i> :TNZT - HF        | -0,2413  | -2,519 to 2,036  | No | ns | >0,9999 |
| <i>S. sanguinis</i> :TAV - HFAg vs. <i>S. sanguinis</i> :TNZT - HFAg      | -0,3733  | -2,651 to 1,904  | No | ns | >0,9999 |
| <i>S. sanguinis</i> :TAV - HFAg vs. <i>A. naeslundii</i> :TAV - Control   | 1,037    | -1,135 to 3,208  | No | ns | 0,9979  |
| <i>S. sanguinis</i> :TAV - HFAg vs. <i>A. naeslundii</i> :TAV - CaP       | 1,937    | -0,4910 to 4,364 | No | ns | 0,4028  |
| <i>S. sanguinis</i> :TAV - HFAg vs. <i>A. naeslundii</i> :TAV - CaPAg     | 0,9800   | -1,191 to 3,151  | No | ns | 0,9993  |
| <i>S. sanguinis</i> :TAV - HFAg vs. <i>A. naeslundii</i> :TAV - HF        | 0,9950   | -1,176 to 3,166  | No | ns | 0,9990  |
| <i>S. sanguinis</i> :TAV - HFAg vs. <i>A. naeslundii</i> :TAV - HFAg      | 1,192    | -0,9797 to 3,363 | No | ns | 0,9791  |
| <i>S. sanguinis</i> :TAV - HFAg vs. <i>A. naeslundii</i> :TNZT - Control  | 0,9533   | -1,218 to 3,125  | No | ns | 0,9996  |
| <i>S. sanguinis</i> :TAV - HFAg vs. <i>A. naeslundii</i> :TNZT - CaP      | 1,037    | -1,135 to 3,208  | No | ns | 0,9979  |
| <i>S. sanguinis</i> :TAV - HFAg vs. <i>A. naeslundii</i> :TNZT - CaPAg    | 0,8583   | -1,313 to 3,030  | No | ns | >0,9999 |
| <i>S. sanguinis</i> :TAV - HFAg vs. <i>A. naeslundii</i> :TNZT - HF       | 1,407    | -0,7647 to 3,578 | No | ns | 0,8488  |
| <i>S. sanguinis</i> :TAV - HFAg vs. <i>A. naeslundii</i> :TNZT - HFAg     | 0,6892   | -1,739 to 3,117  | No | ns | >0,9999 |
| <i>S. sanguinis</i> :TAV - HFAg vs. <i>P. gingivalis</i> :TAV - Control   | 0,2033   | -1,968 to 2,375  | No | ns | >0,9999 |
| <i>S. sanguinis</i> :TAV - HFAg vs. <i>P. gingivalis</i> :TAV - CaP       | -0,9517  | -3,123 to 1,220  | No | ns | 0,9996  |
| <i>S. sanguinis</i> :TAV - HFAg vs. <i>P. gingivalis</i> :TAV - CaPAg     | -1,060   | -3,231 to 1,111  | No | ns | 0,9968  |

|                                                                              |              |                        |            |           |               |
|------------------------------------------------------------------------------|--------------|------------------------|------------|-----------|---------------|
| <i>S. sanguinis</i> :TAV - HFAg vs. <i>P. gingivalis</i> :TAV - HF           | -0,2317      | -2,403 to 1,940        | No         | ns        | >0,9999       |
| <i>S. sanguinis</i> :TAV - HFAg vs. <i>P. gingivalis</i> :TAV - HFAg         | -0,7413      | -3,019 to 1,536        | No         | ns        | >0,9999       |
| <i>S. sanguinis</i> :TAV - HFAg vs. <i>P. gingivalis</i> :TNZT - Control     | -0,9567      | -3,128 to 1,215        | No         | ns        | 0,9996        |
| <i>S. sanguinis</i> :TAV - HFAg vs. <i>P. gingivalis</i> :TNZT - CaP         | -0,4417      | -2,613 to 1,730        | No         | ns        | >0,9999       |
| <i>S. sanguinis</i> :TAV - HFAg vs. <i>P. gingivalis</i> :TNZT - CaPAg       | -1,192       | -3,363 to 0,9797       | No         | ns        | 0,9791        |
| <i>S. sanguinis</i> :TAV - HFAg vs. <i>P. gingivalis</i> :TNZT - HF          | -0,5167      | -2,688 to 1,655        | No         | ns        | >0,9999       |
| <i>S. sanguinis</i> :TAV - HFAg vs. <i>P. gingivalis</i> :TNZT - HFAg        | -0,7193      | -2,997 to 1,558        | No         | ns        | >0,9999       |
| <i>S. sanguinis</i> :TNZT - Control vs. <i>S. sanguinis</i> :TNZT - CaP      | -0,8650      | -3,036 to 1,306        | No         | ns        | >0,9999       |
| <i>S. sanguinis</i> :TNZT - Control vs. <i>S. sanguinis</i> :TNZT - CaPAg    | -0,4567      | -2,628 to 1,715        | No         | ns        | >0,9999       |
| <i>S. sanguinis</i> :TNZT - Control vs. <i>S. sanguinis</i> :TNZT - HF       | -0,2263      | -2,504 to 2,051        | No         | ns        | >0,9999       |
| <i>S. sanguinis</i> :TNZT - Control vs. <i>S. sanguinis</i> :TNZT - HFAg     | -0,3583      | -2,636 to 1,919        | No         | ns        | >0,9999       |
| <i>S. sanguinis</i> :TNZT - Control vs. <i>A. naeslundii</i> :TAV - Control  | 1,052        | -1,120 to 3,223        | No         | ns        | 0,9973        |
| <i>S. sanguinis</i> :TNZT - Control vs. <i>A. naeslundii</i> :TAV - CaP      | 1,952        | -0,4760 to 4,379       | No         | ns        | 0,3845        |
| <i>S. sanguinis</i> :TNZT - Control vs. <i>A. naeslundii</i> :TAV - CaPAg    | 0,9950       | -1,176 to 3,166        | No         | ns        | 0,9990        |
| <i>S. sanguinis</i> :TNZT - Control vs. <i>A. naeslundii</i> :TAV - HF       | 1,010        | -1,161 to 3,181        | No         | ns        | 0,9987        |
| <i>S. sanguinis</i> :TNZT - Control vs. <i>A. naeslundii</i> :TAV - HFAg     | 1,207        | -0,9647 to 3,378       | No         | ns        | 0,9750        |
| <i>S. sanguinis</i> :TNZT - Control vs. <i>A. naeslundii</i> :TNZT - Control | 0,9683       | -1,203 to 3,140        | No         | ns        | 0,9994        |
| <i>S. sanguinis</i> :TNZT - Control vs. <i>A. naeslundii</i> :TNZT - CaP     | 1,052        | -1,120 to 3,223        | No         | ns        | 0,9973        |
| <i>S. sanguinis</i> :TNZT - Control vs. <i>A. naeslundii</i> :TNZT - CaPAg   | 0,8733       | -1,298 to 3,045        | No         | ns        | >0,9999       |
| <i>S. sanguinis</i> :TNZT - Control vs. <i>A. naeslundii</i> :TNZT - HF      | 1,422        | -0,7497 to 3,593       | No         | ns        | 0,8332        |
| <i>S. sanguinis</i> :TNZT - Control vs. <i>A. naeslundii</i> :TNZT - HFAg    | 0,7042       | -1,724 to 3,132        | No         | ns        | >0,9999       |
| <i>S. sanguinis</i> :TNZT - Control vs. <i>P. gingivalis</i> :TAV - Control  | 0,2183       | -1,953 to 2,390        | No         | ns        | >0,9999       |
| <i>S. sanguinis</i> :TNZT - Control vs. <i>P. gingivalis</i> :TAV - CaP      | -0,9367      | -3,108 to 1,235        | No         | ns        | 0,9997        |
| <i>S. sanguinis</i> :TNZT - Control vs. <i>P. gingivalis</i> :TAV - CaPAg    | -1,045       | -3,216 to 1,126        | No         | ns        | 0,9976        |
| <i>S. sanguinis</i> :TNZT - Control vs. <i>P. gingivalis</i> :TAV - HF       | -0,2167      | -2,388 to 1,955        | No         | ns        | >0,9999       |
| <i>S. sanguinis</i> :TNZT - Control vs. <i>P. gingivalis</i> :TAV - HFAg     | -0,7263      | -3,004 to 1,551        | No         | ns        | >0,9999       |
| <i>S. sanguinis</i> :TNZT - Control vs. <i>P. gingivalis</i> :TNZT - Control | -0,9417      | -3,113 to 1,230        | No         | ns        | 0,9997        |
| <i>S. sanguinis</i> :TNZT - Control vs. <i>P. gingivalis</i> :TNZT - CaP     | -0,4267      | -2,598 to 1,745        | No         | ns        | >0,9999       |
| <i>S. sanguinis</i> :TNZT - Control vs. <i>P. gingivalis</i> :TNZT - CaPAg   | -1,177       | -3,348 to 0,9947       | No         | ns        | 0,9826        |
| <i>S. sanguinis</i> :TNZT - Control vs. <i>P. gingivalis</i> :TNZT - HF      | -0,5017      | -2,673 to 1,670        | No         | ns        | >0,9999       |
| <i>S. sanguinis</i> :TNZT - Control vs. <i>P. gingivalis</i> :TNZT - HFAg    | -0,7043      | -2,982 to 1,573        | No         | ns        | >0,9999       |
| <i>S. sanguinis</i> :TNZT - CaP vs. <i>S. sanguinis</i> :TNZT - CaPAg        | 0,4083       | -1,763 to 2,580        | No         | ns        | >0,9999       |
| <i>S. sanguinis</i> :TNZT - CaP vs. <i>S. sanguinis</i> :TNZT - HF           | 0,6387       | -1,639 to 2,916        | No         | ns        | >0,9999       |
| <i>S. sanguinis</i> :TNZT - CaP vs. <i>S. sanguinis</i> :TNZT - HFAg         | 0,5067       | -1,771 to 2,784        | No         | ns        | >0,9999       |
| <i>S. sanguinis</i> :TNZT - CaP vs. <i>A. naeslundii</i> :TAV - Control      | 1,917        | -0,2547 to 4,088       | No         | ns        | 0,1920        |
| <b><i>S. sanguinis</i>:TNZT - CaP vs. <i>A. naeslundii</i>:TAV - CaP</b>     | <b>2,817</b> | <b>0,3890 to 5,244</b> | <b>Yes</b> | <b>**</b> | <b>0,0050</b> |
| <i>S. sanguinis</i> :TNZT - CaP vs. <i>A. naeslundii</i> :TAV - CaPAg        | 1,860        | -0,3114 to 4,031       | No         | ns        | 0,2466        |
| <i>S. sanguinis</i> :TNZT - CaP vs. <i>A. naeslundii</i> :TAV - HF           | 1,875        | -0,2964 to 4,046       | No         | ns        | 0,2312        |
| <i>S. sanguinis</i> :TNZT - CaP vs. <i>A. naeslundii</i> :TAV - HFAg         | 2,072        | -0,09972 to 4,243      | No         | ns        | 0,0881        |
| <i>S. sanguinis</i> :TNZT - CaP vs. <i>A. naeslundii</i> :TNZT - Control     | 1,833        | -0,3381 to 4,005       | No         | ns        | 0,2756        |
| <i>S. sanguinis</i> :TNZT - CaP vs. <i>A. naeslundii</i> :TNZT - CaP         | 1,917        | -0,2547 to 4,088       | No         | ns        | 0,1920        |
| <i>S. sanguinis</i> :TNZT - CaP vs. <i>A. naeslundii</i> :TNZT - CaPAg       | 1,738        | -0,4331 to 3,910       | No         | ns        | 0,3944        |
| <b><i>S. sanguinis</i>:TNZT - CaP vs. <i>A. naeslundii</i>:TNZT - HF</b>     | <b>2,287</b> | <b>0,1153 to 4,458</b> | <b>Yes</b> | <b>*</b>  | <b>0,0245</b> |
| <i>S. sanguinis</i> :TNZT - CaP vs. <i>A. naeslundii</i> :TNZT - HFAg        | 1,569        | -0,8585 to 3,997       | No         | ns        | 0,8520        |
| <i>S. sanguinis</i> :TNZT - CaP vs. <i>P. gingivalis</i> :TAV - Control      | 1,083        | -1,088 to 3,255        | No         | ns        | 0,9954        |
| <i>S. sanguinis</i> :TNZT - CaP vs. <i>P. gingivalis</i> :TAV - CaP          | -0,07167     | -2,243 to 2,100        | No         | ns        | >0,9999       |
| <i>S. sanguinis</i> :TNZT - CaP vs. <i>P. gingivalis</i> :TAV - CaPAg        | -0,1800      | -2,351 to 1,991        | No         | ns        | >0,9999       |
| <i>S. sanguinis</i> :TNZT - CaP vs. <i>P. gingivalis</i> :TAV - HF           | 0,6483       | -1,523 to 2,820        | No         | ns        | >0,9999       |
| <i>S. sanguinis</i> :TNZT - CaP vs. <i>P. gingivalis</i> :TAV - HFAg         | 0,1387       | -2,139 to 2,416        | No         | ns        | >0,9999       |
| <i>S. sanguinis</i> :TNZT - CaP vs. <i>P. gingivalis</i> :TNZT - Control     | -0,07667     | -2,248 to 2,095        | No         | ns        | >0,9999       |
| <i>S. sanguinis</i> :TNZT - CaP vs. <i>P. gingivalis</i> :TNZT - CaP         | 0,4383       | -1,733 to 2,610        | No         | ns        | >0,9999       |
| <i>S. sanguinis</i> :TNZT - CaP vs. <i>P. gingivalis</i> :TNZT - CaPAg       | -0,3117      | -2,483 to 1,860        | No         | ns        | >0,9999       |
| <i>S. sanguinis</i> :TNZT - CaP vs. <i>P. gingivalis</i> :TNZT - HF          | 0,3633       | -1,808 to 2,535        | No         | ns        | >0,9999       |
| <i>S. sanguinis</i> :TNZT - CaP vs. <i>P. gingivalis</i> :TNZT - HFAg        | 0,1607       | -2,117 to 2,438        | No         | ns        | >0,9999       |
| <i>S. sanguinis</i> :TNZT - CaPAg vs. <i>S. sanguinis</i> :TNZT - HF         | 0,2303       | -2,047 to 2,508        | No         | ns        | >0,9999       |
| <i>S. sanguinis</i> :TNZT - CaPAg vs. <i>S. sanguinis</i> :TNZT - HFAg       | 0,09833      | -2,179 to 2,376        | No         | ns        | >0,9999       |
| <i>S. sanguinis</i> :TNZT - CaPAg vs. <i>A. naeslundii</i> :TAV - Control    | 1,508        | -0,6631 to 3,680       | No         | ns        | 0,7273        |
| <i>S. sanguinis</i> :TNZT - CaPAg vs. <i>A. naeslundii</i> :TAV - CaP        | 2,408        | -0,01935 to 4,836      | No         | ns        | 0,0554        |
| <i>S. sanguinis</i> :TNZT - CaPAg vs. <i>A. naeslundii</i> :TAV - CaPAg      | 1,452        | -0,7197 to 3,623       | No         | ns        | 0,7993        |
| <i>S. sanguinis</i> :TNZT - CaPAg vs. <i>A. naeslundii</i> :TAV - HF         | 1,467        | -0,7047 to 3,638       | No         | ns        | 0,7812        |
| <i>S. sanguinis</i> :TNZT - CaPAg vs. <i>A. naeslundii</i> :TAV - HFAg       | 1,663        | -0,5081 to 3,835       | No         | ns        | 0,5015        |
| <i>S. sanguinis</i> :TNZT - CaPAg vs. <i>A. naeslundii</i> :TNZT - Control   | 1,425        | -0,7464 to 3,596       | No         | ns        | 0,8296        |
| <i>S. sanguinis</i> :TNZT - CaPAg vs. <i>A. naeslundii</i> :TNZT - CaP       | 1,508        | -0,6631 to 3,680       | No         | ns        | 0,7273        |
| <i>S. sanguinis</i> :TNZT - CaPAg vs. <i>A. naeslundii</i> :TNZT - CaPAg     | 1,330        | -0,8414 to 3,501       | No         | ns        | 0,9151        |
| <i>S. sanguinis</i> :TNZT - CaPAg vs. <i>A. naeslundii</i> :TNZT - HF        | 1,878        | -0,2931 to 4,050       | No         | ns        | 0,2279        |
| <i>S. sanguinis</i> :TNZT - CaPAg vs. <i>A. naeslundii</i> :TNZT - HFAg      | 1,161        | -1,267 to 3,589        | No         | ns        | 0,9978        |
| <i>S. sanguinis</i> :TNZT - CaPAg vs. <i>P. gingivalis</i> :TAV - Control    | 0,6750       | -1,496 to 2,846        | No         | ns        | >0,9999       |
| <i>S. sanguinis</i> :TNZT - CaPAg vs. <i>P. gingivalis</i> :TAV - CaP        | -0,4800      | -2,651 to 1,691        | No         | ns        | >0,9999       |
| <i>S. sanguinis</i> :TNZT - CaPAg vs. <i>P. gingivalis</i> :TAV - CaPAg      | -0,5883      | -2,760 to 1,583        | No         | ns        | >0,9999       |
| <i>S. sanguinis</i> :TNZT - CaPAg vs. <i>P. gingivalis</i> :TAV - HF         | 0,2400       | -1,931 to 2,411        | No         | ns        | >0,9999       |
| <i>S. sanguinis</i> :TNZT - CaPAg vs. <i>P. gingivalis</i> :TAV - HFAg       | -0,2697      | -2,547 to 2,008        | No         | ns        | >0,9999       |
| <i>S. sanguinis</i> :TNZT - CaPAg vs. <i>P. gingivalis</i> :TNZT - Control   | -0,4850      | -2,656 to 1,686        | No         | ns        | >0,9999       |

|                                                                                 |               |                           |            |          |               |
|---------------------------------------------------------------------------------|---------------|---------------------------|------------|----------|---------------|
| <i>S. sanguinis</i> :TNZT - CaPAg vs. <i>P. gingivalis</i> :TNZT - CaP          | 0,03000       | -2,141 to 2,201           | No         | ns       | >0,9999       |
| <i>S. sanguinis</i> :TNZT - CaPAg vs. <i>P. gingivalis</i> :TNZT - CaPAg        | -0,7200       | -2,891 to 1,451           | No         | ns       | >0,9999       |
| <i>S. sanguinis</i> :TNZT - CaPAg vs. <i>P. gingivalis</i> :TNZT - HF           | -0,04500      | -2,216 to 2,126           | No         | ns       | >0,9999       |
| <i>S. sanguinis</i> :TNZT - CaPAg vs. <i>P. gingivalis</i> :TNZT - HFAG         | -0,2477       | -2,525 to 2,030           | No         | ns       | >0,9999       |
| <i>S. sanguinis</i> :TNZT - HF vs. <i>S. sanguinis</i> :TNZT - HFAG             | -0,1320       | -2,511 to 2,247           | No         | ns       | >0,9999       |
| <i>S. sanguinis</i> :TNZT - HF vs. <i>A. naeslundii</i> :TAV - Control          | 1,278         | -0,9994 to 3,555          | No         | ns       | 0,9714        |
| <i>S. sanguinis</i> :TNZT - HF vs. <i>A. naeslundii</i> :TAV - CaP              | 2,178         | -0,3449 to 4,701          | No         | ns       | 0,2317        |
| <i>S. sanguinis</i> :TNZT - HF vs. <i>A. naeslundii</i> :TAV - CaPAg            | 1,221         | -1,056 to 3,499           | No         | ns       | 0,9851        |
| <i>S. sanguinis</i> :TNZT - HF vs. <i>A. naeslundii</i> :TAV - HF               | 1,236         | -1,041 to 3,514           | No         | ns       | 0,9822        |
| <i>S. sanguinis</i> :TNZT - HF vs. <i>A. naeslundii</i> :TAV - HFAG             | 1,433         | -0,8444 to 3,710          | No         | ns       | 0,8867        |
| <i>S. sanguinis</i> :TNZT - HF vs. <i>A. naeslundii</i> :TNZT - Control         | 1,195         | -1,083 to 3,472           | No         | ns       | 0,9894        |
| <i>S. sanguinis</i> :TNZT - HF vs. <i>A. naeslundii</i> :TNZT - CaP             | 1,278         | -0,9994 to 3,555          | No         | ns       | 0,9714        |
| <i>S. sanguinis</i> :TNZT - HF vs. <i>A. naeslundii</i> :TNZT - CaPAg           | 1,100         | -1,178 to 3,377           | No         | ns       | 0,9974        |
| <i>S. sanguinis</i> :TNZT - HF vs. <i>A. naeslundii</i> :TNZT - HF              | 1,648         | -0,6294 to 3,925          | No         | ns       | 0,6382        |
| <i>S. sanguinis</i> :TNZT - HF vs. <i>A. naeslundii</i> :TNZT - HFAG            | 0,9305        | -1,592 to 3,453           | No         | ns       | >0,9999       |
| <i>S. sanguinis</i> :TNZT - HF vs. <i>P. gingivalis</i> :TAV - Control          | 0,4447        | -1,833 to 2,722           | No         | ns       | >0,9999       |
| <i>S. sanguinis</i> :TNZT - HF vs. <i>P. gingivalis</i> :TAV - CaP              | -0,7103       | -2,988 to 1,567           | No         | ns       | >0,9999       |
| <i>S. sanguinis</i> :TNZT - HF vs. <i>P. gingivalis</i> :TAV - CaPAg            | -0,8187       | -3,096 to 1,459           | No         | ns       | >0,9999       |
| <i>S. sanguinis</i> :TNZT - HF vs. <i>P. gingivalis</i> :TAV - HF               | 0,009667      | -2,268 to 2,287           | No         | ns       | >0,9999       |
| <i>S. sanguinis</i> :TNZT - HF vs. <i>P. gingivalis</i> :TAV - HFAG             | -0,5000       | -2,879 to 1,879           | No         | ns       | >0,9999       |
| <i>S. sanguinis</i> :TNZT - HF vs. <i>P. gingivalis</i> :TNZT - Control         | -0,7153       | -2,993 to 1,562           | No         | ns       | >0,9999       |
| <i>S. sanguinis</i> :TNZT - HF vs. <i>P. gingivalis</i> :TNZT - CaP             | -0,2003       | -2,478 to 2,077           | No         | ns       | >0,9999       |
| <i>S. sanguinis</i> :TNZT - HF vs. <i>P. gingivalis</i> :TNZT - CaPAg           | -0,9503       | -3,228 to 1,327           | No         | ns       | 0,9999        |
| <i>S. sanguinis</i> :TNZT - HF vs. <i>P. gingivalis</i> :TNZT - HF              | -0,2753       | -2,553 to 2,002           | No         | ns       | >0,9999       |
| <i>S. sanguinis</i> :TNZT - HF vs. <i>P. gingivalis</i> :TNZT - HFAG            | -0,4780       | -2,857 to 1,901           | No         | ns       | >0,9999       |
| <i>S. sanguinis</i> :TNZT - HFAG vs. <i>A. naeslundii</i> :TAV - Control        | 1,410         | -0,8674 to 3,687          | No         | ns       | 0,9045        |
| <i>S. sanguinis</i> :TNZT - HFAG vs. <i>A. naeslundii</i> :TAV - CaP            | 2,310         | -0,2129 to 4,833          | No         | ns       | 0,1363        |
| <i>S. sanguinis</i> :TNZT - HFAG vs. <i>A. naeslundii</i> :TAV - CaPAg          | 1,353         | -0,9240 to 3,631          | No         | ns       | 0,9402        |
| <i>S. sanguinis</i> :TNZT - HFAG vs. <i>A. naeslundii</i> :TAV - HF             | 1,368         | -0,9090 to 3,646          | No         | ns       | 0,9318        |
| <i>S. sanguinis</i> :TNZT - HFAG vs. <i>A. naeslundii</i> :TAV - HFAG           | 1,565         | -0,7124 to 3,842          | No         | ns       | 0,7488        |
| <i>S. sanguinis</i> :TNZT - HFAG vs. <i>A. naeslundii</i> :TNZT - Control       | 1,327         | -0,9507 to 3,604          | No         | ns       | 0,9532        |
| <i>S. sanguinis</i> :TNZT - HFAG vs. <i>A. naeslundii</i> :TNZT - CaP           | 1,410         | -0,8674 to 3,687          | No         | ns       | 0,9045        |
| <i>S. sanguinis</i> :TNZT - HFAG vs. <i>A. naeslundii</i> :TNZT - CaPAg         | 1,232         | -1,046 to 3,509           | No         | ns       | 0,9831        |
| <i>S. sanguinis</i> :TNZT - HFAG vs. <i>A. naeslundii</i> :TNZT - HF            | 1,780         | -0,4974 to 4,057          | No         | ns       | 0,4522        |
| <i>S. sanguinis</i> :TNZT - HFAG vs. <i>A. naeslundii</i> :TNZT - HFAG          | 1,063         | -1,460 to 3,585           | No         | ns       | 0,9998        |
| <i>S. sanguinis</i> :TNZT - HFAG vs. <i>P. gingivalis</i> :TAV - Control        | 0,5767        | -1,701 to 2,854           | No         | ns       | >0,9999       |
| <i>S. sanguinis</i> :TNZT - HFAG vs. <i>P. gingivalis</i> :TAV - CaP            | -0,5783       | -2,856 to 1,699           | No         | ns       | >0,9999       |
| <i>S. sanguinis</i> :TNZT - HFAG vs. <i>P. gingivalis</i> :TAV - CaPAg          | -0,6867       | -2,964 to 1,591           | No         | ns       | >0,9999       |
| <i>S. sanguinis</i> :TNZT - HFAG vs. <i>P. gingivalis</i> :TAV - HF             | 0,1417        | -2,136 to 2,419           | No         | ns       | >0,9999       |
| <i>S. sanguinis</i> :TNZT - HFAG vs. <i>P. gingivalis</i> :TAV - HFAG           | -0,3680       | -2,747 to 2,011           | No         | ns       | >0,9999       |
| <i>S. sanguinis</i> :TNZT - HFAG vs. <i>P. gingivalis</i> :TNZT - Control       | -0,5833       | -2,861 to 1,694           | No         | ns       | >0,9999       |
| <i>S. sanguinis</i> :TNZT - HFAG vs. <i>P. gingivalis</i> :TNZT - CaP           | -0,06833      | -2,346 to 2,209           | No         | ns       | >0,9999       |
| <i>S. sanguinis</i> :TNZT - HFAG vs. <i>P. gingivalis</i> :TNZT - CaPAg         | -0,8183       | -3,096 to 1,459           | No         | ns       | >0,9999       |
| <i>S. sanguinis</i> :TNZT - HFAG vs. <i>P. gingivalis</i> :TNZT - HF            | -0,1433       | -2,421 to 2,134           | No         | ns       | >0,9999       |
| <i>S. sanguinis</i> :TNZT - HFAG vs. <i>P. gingivalis</i> :TNZT - HFAG          | -0,3460       | -2,725 to 2,033           | No         | ns       | >0,9999       |
| <i>A. naeslundii</i> :TAV - Control vs. <i>A. naeslundii</i> :TAV - CaP         | 0,9000        | -1,528 to 3,328           | No         | ns       | >0,9999       |
| <i>A. naeslundii</i> :TAV - Control vs. <i>A. naeslundii</i> :TAV - CaPAg       | -0,05667      | -2,228 to 2,115           | No         | ns       | >0,9999       |
| <i>A. naeslundii</i> :TAV - Control vs. <i>A. naeslundii</i> :TAV - HF          | -0,04167      | -2,213 to 2,130           | No         | ns       | >0,9999       |
| <i>A. naeslundii</i> :TAV - Control vs. <i>A. naeslundii</i> :TAV - HFAG        | 0,1550        | -2,016 to 2,326           | No         | ns       | >0,9999       |
| <i>A. naeslundii</i> :TAV - Control vs. <i>A. naeslundii</i> :TNZT - Control    | -0,08333      | -2,255 to 2,088           | No         | ns       | >0,9999       |
| <i>A. naeslundii</i> :TAV - Control vs. <i>A. naeslundii</i> :TNZT - CaP        | 0,000         | -2,171 to 2,171           | No         | ns       | >0,9999       |
| <i>A. naeslundii</i> :TAV - Control vs. <i>A. naeslundii</i> :TNZT - CaPAg      | -0,1783       | -2,350 to 1,993           | No         | ns       | >0,9999       |
| <i>A. naeslundii</i> :TAV - Control vs. <i>A. naeslundii</i> :TNZT - HF         | 0,3700        | -1,801 to 2,541           | No         | ns       | >0,9999       |
| <i>A. naeslundii</i> :TAV - Control vs. <i>A. naeslundii</i> :TNZT - HFAG       | -0,3475       | -2,775 to 2,080           | No         | ns       | >0,9999       |
| <i>A. naeslundii</i> :TAV - Control vs. <i>P. gingivalis</i> :TAV - Control     | -0,8333       | -3,005 to 1,338           | No         | ns       | >0,9999       |
| <i>A. naeslundii</i> :TAV - Control vs. <i>P. gingivalis</i> :TAV - CaP         | -1,988        | -4,160 to 0,1831          | No         | ns       | 0,1361        |
| <i>A. naeslundii</i> :TAV - Control vs. <i>P. gingivalis</i> :TAV - CaPAg       | -2,097        | -4,268 to 0,07472         | No         | ns       | 0,0768        |
| <i>A. naeslundii</i> :TAV - Control vs. <i>P. gingivalis</i> :TAV - HF          | -1,268        | -3,440 to 0,9031          | No         | ns       | 0,9516        |
| <i>A. naeslundii</i> :TAV - Control vs. <i>P. gingivalis</i> :TAV - HFAG        | -1,778        | -4,055 to 0,4994          | No         | ns       | 0,4549        |
| <i>A. naeslundii</i> :TAV - Control vs. <i>P. gingivalis</i> :TNZT - Control    | -1,993        | -4,165 to 0,1781          | No         | ns       | 0,1328        |
| <i>A. naeslundii</i> :TAV - Control vs. <i>P. gingivalis</i> :TNZT - CaP        | -1,478        | -3,650 to 0,6931          | No         | ns       | 0,7666        |
| <b><i>A. naeslundii</i>:TAV - Control vs. <i>P. gingivalis</i>:TNZT - CaPAg</b> | <b>-2,228</b> | <b>-4,400 to -0,05694</b> | <b>Yes</b> | <b>*</b> | <b>0,0354</b> |
| <i>A. naeslundii</i> :TAV - Control vs. <i>P. gingivalis</i> :TNZT - HF         | -1,553        | -3,725 to 0,6181          | No         | ns       | 0,6644        |
| <i>A. naeslundii</i> :TAV - Control vs. <i>P. gingivalis</i> :TNZT - HFAG       | -1,756        | -4,033 to 0,5214          | No         | ns       | 0,4854        |
| <i>A. naeslundii</i> :TAV - CaP vs. <i>A. naeslundii</i> :TAV - CaPAg           | -0,9567       | -3,384 to 1,471           | No         | ns       | >0,9999       |
| <i>A. naeslundii</i> :TAV - CaP vs. <i>A. naeslundii</i> :TAV - HF              | -0,9417       | -3,369 to 1,486           | No         | ns       | >0,9999       |
| <i>A. naeslundii</i> :TAV - CaP vs. <i>A. naeslundii</i> :TAV - HFAG            | -0,7450       | -3,173 to 1,683           | No         | ns       | >0,9999       |
| <i>A. naeslundii</i> :TAV - CaP vs. <i>A. naeslundii</i> :TNZT - Control        | -0,9833       | -3,411 to 1,444           | No         | ns       | >0,9999       |
| <i>A. naeslundii</i> :TAV - CaP vs. <i>A. naeslundii</i> :TNZT - CaP            | -0,9000       | -3,328 to 1,528           | No         | ns       | >0,9999       |
| <i>A. naeslundii</i> :TAV - CaP vs. <i>A. naeslundii</i> :TNZT - CaPAg          | -1,078        | -3,506 to 1,349           | No         | ns       | 0,9995        |
| <i>A. naeslundii</i> :TAV - CaP vs. <i>A. naeslundii</i> :TNZT - HF             | -0,5300       | -2,958 to 1,898           | No         | ns       | >0,9999       |
| <i>A. naeslundii</i> :TAV - CaP vs. <i>A. naeslundii</i> :TNZT - HFAG           | -1,248        | -3,907 to 1,412           | No         | ns       | 0,9985        |

|                                                                 |               |                             |            |            |               |
|-----------------------------------------------------------------|---------------|-----------------------------|------------|------------|---------------|
| A. naeslundii:TAV - CaP vs. P. gingivalis:TAV - Control         | -1,733        | -4,161 to 0,6944            | No         | ns         | 0,6687        |
| <b>A. naeslundii:TAV - CaP vs. P. gingivalis:TAV - CaP</b>      | <b>-2,888</b> | <b>-5,316 to -0,4606</b>    | <b>Yes</b> | <b>**</b>  | <b>0,0031</b> |
| <b>A. naeslundii:TAV - CaP vs. P. gingivalis:TAV - CaPAg</b>    | <b>-2,997</b> | <b>-5,424 to -0,5690</b>    | <b>Yes</b> | <b>**</b>  | <b>0,0015</b> |
| A. naeslundii:TAV - CaP vs. P. gingivalis:TAV - HF              | -2,168        | -4,596 to 0,2594            | No         | ns         | 0,1727        |
| <b>A. naeslundii:TAV - CaP vs. P. gingivalis:TAV - HFAG</b>     | <b>-2,678</b> | <b>-5,201 to -0,1551</b>    | <b>Yes</b> | <b>*</b>   | <b>0,0218</b> |
| <b>A. naeslundii:TAV - CaP vs. P. gingivalis:TNZT - Control</b> | <b>-2,893</b> | <b>-5,321 to -0,4656</b>    | <b>Yes</b> | <b>**</b>  | <b>0,0030</b> |
| A. naeslundii:TAV - CaP vs. P. gingivalis:TNZT - CaP            | -2,378        | -4,806 to 0,04935           | No         | ns         | 0,0646        |
| <b>A. naeslundii:TAV - CaP vs. P. gingivalis:TNZT - CaPAg</b>   | <b>-3,128</b> | <b>-5,556 to -0,7006</b>    | <b>Yes</b> | <b>***</b> | <b>0,0006</b> |
| <b>A. naeslundii:TAV - CaP vs. P. gingivalis:TNZT - HF</b>      | <b>-2,453</b> | <b>-4,881 to -0,02565</b>   | <b>Yes</b> | <b>*</b>   | <b>0,0436</b> |
| <b>A. naeslundii:TAV - CaP vs. P. gingivalis:TNZT - HFAG</b>    | <b>-2,656</b> | <b>-5,179 to -0,1331</b>    | <b>Yes</b> | <b>*</b>   | <b>0,0247</b> |
| A. naeslundii:TAV - CaPAg vs. A. naeslundii:TAV - HF            | 0,01500       | -2,156 to 2,186             | No         | ns         | >0,9999       |
| A. naeslundii:TAV - CaPAg vs. A. naeslundii:TAV - HFAG          | 0,2117        | -1,960 to 2,383             | No         | ns         | >0,9999       |
| A. naeslundii:TAV - CaPAg vs. A. naeslundii:TNZT - Control      | -0,02667      | -2,198 to 2,145             | No         | ns         | >0,9999       |
| A. naeslundii:TAV - CaPAg vs. A. naeslundii:TNZT - CaP          | 0,05667       | -2,115 to 2,228             | No         | ns         | >0,9999       |
| A. naeslundii:TAV - CaPAg vs. A. naeslundii:TNZT - CaPAg        | -0,1217       | -2,293 to 2,050             | No         | ns         | >0,9999       |
| A. naeslundii:TAV - CaPAg vs. A. naeslundii:TNZT - HF           | 0,4267        | -1,745 to 2,598             | No         | ns         | >0,9999       |
| A. naeslundii:TAV - CaPAg vs. A. naeslundii:TNZT - HFAG         | -0,2908       | -2,719 to 2,137             | No         | ns         | >0,9999       |
| A. naeslundii:TAV - CaPAg vs. P. gingivalis:TAV - Control       | -0,7767       | -2,948 to 1,395             | No         | ns         | >0,9999       |
| A. naeslundii:TAV - CaPAg vs. P. gingivalis:TAV - CaP           | -1,932        | -4,103 to 0,2397            | No         | ns         | 0,1791        |
| A. naeslundii:TAV - CaPAg vs. P. gingivalis:TAV - CaPAg         | -2,040        | -4,211 to 0,1314            | No         | ns         | 0,1044        |
| A. naeslundii:TAV - CaPAg vs. P. gingivalis:TAV - HF            | -1,212        | -3,383 to 0,9597            | No         | ns         | 0,9736        |
| A. naeslundii:TAV - CaPAg vs. P. gingivalis:TAV - HFAG          | -1,721        | -3,999 to 0,5560            | No         | ns         | 0,5343        |
| A. naeslundii:TAV - CaPAg vs. P. gingivalis:TNZT - Control      | -1,937        | -4,108 to 0,2347            | No         | ns         | 0,1749        |
| A. naeslundii:TAV - CaPAg vs. P. gingivalis:TNZT - CaP          | -1,422        | -3,593 to 0,7497            | No         | ns         | 0,8332        |
| <b>A. naeslundii:TAV - CaPAg vs. P. gingivalis:TNZT - CaPAg</b> | <b>-2,172</b> | <b>-4,343 to -0,0002765</b> | <b>Yes</b> | <b>*</b>   | <b>0,0499</b> |
| A. naeslundii:TAV - CaPAg vs. P. gingivalis:TNZT - HF           | -1,497        | -3,668 to 0,6747            | No         | ns         | 0,7429        |
| A. naeslundii:TAV - CaPAg vs. P. gingivalis:TNZT - HFAG         | -1,699        | -3,977 to 0,5780            | No         | ns         | 0,5656        |
| A. naeslundii:TAV - HF vs. A. naeslundii:TAV - HFAG             | 0,1967        | -1,975 to 2,368             | No         | ns         | >0,9999       |
| A. naeslundii:TAV - HF vs. A. naeslundii:TNZT - Control         | -0,04167      | -2,213 to 2,130             | No         | ns         | >0,9999       |
| A. naeslundii:TAV - HF vs. A. naeslundii:TNZT - CaP             | 0,04167       | -2,130 to 2,213             | No         | ns         | >0,9999       |
| A. naeslundii:TAV - HF vs. A. naeslundii:TNZT - CaPAg           | -0,1367       | -2,308 to 2,035             | No         | ns         | >0,9999       |
| A. naeslundii:TAV - HF vs. A. naeslundii:TNZT - HF              | 0,4117        | -1,760 to 2,583             | No         | ns         | >0,9999       |
| A. naeslundii:TAV - HF vs. A. naeslundii:TNZT - HFAG            | -0,3058       | -2,734 to 2,122             | No         | ns         | >0,9999       |
| A. naeslundii:TAV - HF vs. P. gingivalis:TAV - Control          | -0,7917       | -2,963 to 1,380             | No         | ns         | >0,9999       |
| A. naeslundii:TAV - HF vs. P. gingivalis:TAV - CaP              | -1,947        | -4,118 to 0,2247            | No         | ns         | 0,1668        |
| A. naeslundii:TAV - HF vs. P. gingivalis:TAV - CaPAg            | -2,055        | -4,226 to 0,1164            | No         | ns         | 0,0964        |
| A. naeslundii:TAV - HF vs. P. gingivalis:TAV - HF               | -1,227        | -3,398 to 0,9447            | No         | ns         | 0,9687        |
| A. naeslundii:TAV - HF vs. P. gingivalis:TAV - HFAG             | -1,736        | -4,014 to 0,5410            | No         | ns         | 0,5131        |
| A. naeslundii:TAV - HF vs. P. gingivalis:TNZT - Control         | -1,952        | -4,123 to 0,2197            | No         | ns         | 0,1629        |
| A. naeslundii:TAV - HF vs. P. gingivalis:TNZT - CaP             | -1,437        | -3,608 to 0,7347            | No         | ns         | 0,8166        |
| <b>A. naeslundii:TAV - HF vs. P. gingivalis:TNZT - CaPAg</b>    | <b>-2,187</b> | <b>-4,358 to -0,01528</b>   | <b>Yes</b> | <b>*</b>   | <b>0,0457</b> |
| A. naeslundii:TAV - HF vs. P. gingivalis:TNZT - HF              | -1,512        | -3,683 to 0,6597            | No         | ns         | 0,7228        |
| A. naeslundii:TAV - HF vs. P. gingivalis:TNZT - HFAG            | -1,714        | -3,992 to 0,5630            | No         | ns         | 0,5443        |
| A. naeslundii:TAV - HFAG vs. A. naeslundii:TNZT - Control       | -0,2383       | -2,410 to 1,933             | No         | ns         | >0,9999       |
| A. naeslundii:TAV - HFAG vs. A. naeslundii:TNZT - CaP           | -0,1550       | -2,326 to 2,016             | No         | ns         | >0,9999       |
| A. naeslundii:TAV - HFAG vs. A. naeslundii:TNZT - CaPAg         | -0,3333       | -2,505 to 1,838             | No         | ns         | >0,9999       |
| A. naeslundii:TAV - HFAG vs. A. naeslundii:TNZT - HF            | 0,2150        | -1,956 to 2,386             | No         | ns         | >0,9999       |
| A. naeslundii:TAV - HFAG vs. A. naeslundii:TNZT - HFAG          | -0,5025       | -2,930 to 1,925             | No         | ns         | >0,9999       |
| A. naeslundii:TAV - HFAG vs. P. gingivalis:TAV - Control        | -0,9883       | -3,160 to 1,183             | No         | ns         | 0,9992        |
| A. naeslundii:TAV - HFAG vs. P. gingivalis:TAV - CaP            | -2,143        | -4,315 to 0,02806           | No         | ns         | 0,0589        |
| <b>A. naeslundii:TAV - HFAG vs. P. gingivalis:TAV - CaPAg</b>   | <b>-2,252</b> | <b>-4,423 to -0,08028</b>   | <b>Yes</b> | <b>*</b>   | <b>0,0306</b> |
| A. naeslundii:TAV - HFAG vs. P. gingivalis:TAV - HF             | -1,423        | -3,595 to 0,7481            | No         | ns         | 0,8314        |
| A. naeslundii:TAV - HFAG vs. P. gingivalis:TAV - HFAG           | -1,933        | -4,210 to 0,3444            | No         | ns         | 0,2648        |
| A. naeslundii:TAV - HFAG vs. P. gingivalis:TNZT - Control       | -2,148        | -4,320 to 0,02306           | No         | ns         | 0,0572        |
| A. naeslundii:TAV - HFAG vs. P. gingivalis:TNZT - CaP           | -1,633        | -3,805 to 0,5381            | No         | ns         | 0,5461        |
| <b>A. naeslundii:TAV - HFAG vs. P. gingivalis:TNZT - CaPAg</b>  | <b>-2,383</b> | <b>-4,555 to -0,2119</b>    | <b>Yes</b> | <b>*</b>   | <b>0,0129</b> |
| A. naeslundii:TAV - HFAG vs. P. gingivalis:TNZT - HF            | -1,708        | -3,880 to 0,4631            | No         | ns         | 0,4362        |
| A. naeslundii:TAV - HFAG vs. P. gingivalis:TNZT - HFAG          | -1,911        | -4,188 to 0,3664            | No         | ns         | 0,2884        |
| A. naeslundii:TNZT - Control vs. A. naeslundii:TNZT - CaP       | 0,08333       | -2,088 to 2,255             | No         | ns         | >0,9999       |
| A. naeslundii:TNZT - Control vs. A. naeslundii:TNZT - CaPAg     | -0,09500      | -2,266 to 2,076             | No         | ns         | >0,9999       |
| A. naeslundii:TNZT - Control vs. A. naeslundii:TNZT - HF        | 0,4533        | -1,718 to 2,625             | No         | ns         | >0,9999       |
| A. naeslundii:TNZT - Control vs. A. naeslundii:TNZT - HFAG      | -0,2642       | -2,692 to 2,164             | No         | ns         | >0,9999       |
| A. naeslundii:TNZT - Control vs. P. gingivalis:TAV - Control    | -0,7500       | -2,921 to 1,421             | No         | ns         | >0,9999       |
| A. naeslundii:TNZT - Control vs. P. gingivalis:TAV - CaP        | -1,905        | -4,076 to 0,2664            | No         | ns         | 0,2025        |
| A. naeslundii:TNZT - Control vs. P. gingivalis:TAV - CaPAg      | -2,013        | -4,185 to 0,1581            | No         | ns         | 0,1199        |
| A. naeslundii:TNZT - Control vs. P. gingivalis:TAV - HF         | -1,185        | -3,356 to 0,9864            | No         | ns         | 0,9807        |
| A. naeslundii:TNZT - Control vs. P. gingivalis:TAV - HFAG       | -1,695        | -3,972 to 0,5827            | No         | ns         | 0,5723        |
| A. naeslundii:TNZT - Control vs. P. gingivalis:TNZT - Control   | -1,910        | -4,081 to 0,2614            | No         | ns         | 0,1979        |
| A. naeslundii:TNZT - Control vs. P. gingivalis:TNZT - CaP       | -1,395        | -3,566 to 0,7764            | No         | ns         | 0,8604        |
| A. naeslundii:TNZT - Control vs. P. gingivalis:TNZT - CaPAg     | -2,145        | -4,316 to 0,02639           | No         | ns         | 0,0584        |
| A. naeslundii:TNZT - Control vs. P. gingivalis:TNZT - HF        | -1,470        | -3,641 to 0,7014            | No         | ns         | 0,7771        |
| A. naeslundii:TNZT - Control vs. P. gingivalis:TNZT - HFAG      | -1,673        | -3,950 to 0,6047            | No         | ns         | 0,6035        |

|                                                                 |               |                           |            |           |               |
|-----------------------------------------------------------------|---------------|---------------------------|------------|-----------|---------------|
| A. naeslundii:TNZT - CaP vs. A. naeslundii:TNZT - CaPAg         | -0,1783       | -2,350 to 1,993           | No         | ns        | >0,9999       |
| A. naeslundii:TNZT - CaP vs. A. naeslundii:TNZT - HF            | 0,3700        | -1,801 to 2,541           | No         | ns        | >0,9999       |
| A. naeslundii:TNZT - CaP vs. A. naeslundii:TNZT - HFAG          | -0,3475       | -2,775 to 2,080           | No         | ns        | >0,9999       |
| A. naeslundii:TNZT - CaP vs. P. gingivalis:TAV - Control        | -0,8333       | -3,005 to 1,338           | No         | ns        | >0,9999       |
| A. naeslundii:TNZT - CaP vs. P. gingivalis:TAV - CaP            | -1,988        | -4,160 to 0,1831          | No         | ns        | 0,1361        |
| A. naeslundii:TNZT - CaP vs. P. gingivalis:TAV - CaPAg          | -2,097        | -4,268 to 0,07472         | No         | ns        | 0,0768        |
| A. naeslundii:TNZT - CaP vs. P. gingivalis:TAV - HF             | -1,268        | -3,440 to 0,9031          | No         | ns        | 0,9516        |
| A. naeslundii:TNZT - CaP vs. P. gingivalis:TAV - HFAG           | -1,778        | -4,055 to 0,4994          | No         | ns        | 0,4549        |
| A. naeslundii:TNZT - CaP vs. P. gingivalis:TNZT - Control       | -1,993        | -4,165 to 0,1781          | No         | ns        | 0,1328        |
| A. naeslundii:TNZT - CaP vs. P. gingivalis:TNZT - CaP           | -1,478        | -3,650 to 0,6931          | No         | ns        | 0,7666        |
| <b>A. naeslundii:TNZT - CaP vs. P. gingivalis:TNZT - CaPAg</b>  | <b>-2,228</b> | <b>-4,400 to -0,05694</b> | <b>Yes</b> | <b>*</b>  | <b>0,0354</b> |
| A. naeslundii:TNZT - CaP vs. P. gingivalis:TNZT - HF            | -1,553        | -3,725 to 0,6181          | No         | ns        | 0,6644        |
| A. naeslundii:TNZT - CaP vs. P. gingivalis:TNZT - HFAG          | -1,756        | -4,033 to 0,5214          | No         | ns        | 0,4854        |
| A. naeslundii:TNZT - CaPAg vs. A. naeslundii:TNZT - HF          | 0,5483        | -1,623 to 2,720           | No         | ns        | >0,9999       |
| A. naeslundii:TNZT - CaPAg vs. A. naeslundii:TNZT - HFAG        | -0,1692       | -2,597 to 2,259           | No         | ns        | >0,9999       |
| A. naeslundii:TNZT - CaPAg vs. P. gingivalis:TAV - Control      | -0,6550       | -2,826 to 1,516           | No         | ns        | >0,9999       |
| A. naeslundii:TNZT - CaPAg vs. P. gingivalis:TAV - CaP          | -1,810        | -3,981 to 0,3614          | No         | ns        | 0,3026        |
| A. naeslundii:TNZT - CaPAg vs. P. gingivalis:TAV - CaPAg        | -1,918        | -4,090 to 0,2531          | No         | ns        | 0,1905        |
| A. naeslundii:TNZT - CaPAg vs. P. gingivalis:TAV - HF           | -1,090        | -3,261 to 1,081           | No         | ns        | 0,9949        |
| A. naeslundii:TNZT - CaPAg vs. P. gingivalis:TAV - HFAG         | -1,600        | -3,877 to 0,6777          | No         | ns        | 0,7042        |
| A. naeslundii:TNZT - CaPAg vs. P. gingivalis:TNZT - Control     | -1,815        | -3,986 to 0,3564          | No         | ns        | 0,2967        |
| A. naeslundii:TNZT - CaPAg vs. P. gingivalis:TNZT - CaP         | -1,300        | -3,471 to 0,8714          | No         | ns        | 0,9346        |
| A. naeslundii:TNZT - CaPAg vs. P. gingivalis:TNZT - CaPAg       | -2,050        | -4,221 to 0,1214          | No         | ns        | 0,0990        |
| A. naeslundii:TNZT - CaPAg vs. P. gingivalis:TNZT - HF          | -1,375        | -3,546 to 0,7964          | No         | ns        | 0,8791        |
| A. naeslundii:TNZT - CaPAg vs. P. gingivalis:TNZT - HFAG        | -1,578        | -3,855 to 0,6997          | No         | ns        | 0,7328        |
| A. naeslundii:TNZT - HF vs. A. naeslundii:TNZT - HFAG           | -0,7175       | -3,145 to 1,710           | No         | ns        | >0,9999       |
| A. naeslundii:TNZT - HF vs. P. gingivalis:TAV - Control         | -1,203        | -3,375 to 0,9681          | No         | ns        | 0,9760        |
| <b>A. naeslundii:TNZT - HF vs. P. gingivalis:TAV - CaP</b>      | <b>-2,358</b> | <b>-4,530 to -0,1869</b>  | <b>Yes</b> | <b>*</b>  | <b>0,0153</b> |
| <b>A. naeslundii:TNZT - HF vs. P. gingivalis:TAV - CaPAg</b>    | <b>-2,467</b> | <b>-4,638 to -0,2953</b>  | <b>Yes</b> | <b>**</b> | <b>0,0072</b> |
| A. naeslundii:TNZT - HF vs. P. gingivalis:TAV - HF              | -1,638        | -3,810 to 0,5331          | No         | ns        | 0,5386        |
| A. naeslundii:TNZT - HF vs. P. gingivalis:TAV - HFAG            | -2,148        | -4,425 to 0,1294          | No         | ns        | 0,1001        |
| <b>A. naeslundii:TNZT - HF vs. P. gingivalis:TNZT - Control</b> | <b>-2,363</b> | <b>-4,535 to -0,1919</b>  | <b>Yes</b> | <b>*</b>  | <b>0,0148</b> |
| A. naeslundii:TNZT - HF vs. P. gingivalis:TNZT - CaP            | -1,848        | -4,020 to 0,3231          | No         | ns        | 0,2590        |
| <b>A. naeslundii:TNZT - HF vs. P. gingivalis:TNZT - CaPAg</b>   | <b>-2,598</b> | <b>-4,770 to -0,4269</b>  | <b>Yes</b> | <b>**</b> | <b>0,0028</b> |
| A. naeslundii:TNZT - HF vs. P. gingivalis:TNZT - HF             | -1,923        | -4,095 to 0,2481          | No         | ns        | 0,1862        |
| A. naeslundii:TNZT - HF vs. P. gingivalis:TNZT - HFAG           | -2,126        | -4,403 to 0,1514          | No         | ns        | 0,1117        |
| A. naeslundii:TNZT - HFAG vs. P. gingivalis:TAV - Control       | -0,4858       | -2,914 to 1,942           | No         | ns        | >0,9999       |
| A. naeslundii:TNZT - HFAG vs. P. gingivalis:TAV - CaP           | -1,641        | -4,069 to 0,7869          | No         | ns        | 0,7800        |
| A. naeslundii:TNZT - HFAG vs. P. gingivalis:TAV - CaPAg         | -1,749        | -4,177 to 0,6785          | No         | ns        | 0,6482        |
| A. naeslundii:TNZT - HFAG vs. P. gingivalis:TAV - HF            | -0,9208       | -3,349 to 1,507           | No         | ns        | >0,9999       |
| A. naeslundii:TNZT - HFAG vs. P. gingivalis:TAV - HFAG          | -1,431        | -3,953 to 1,092           | No         | ns        | 0,9671        |
| A. naeslundii:TNZT - HFAG vs. P. gingivalis:TNZT - Control      | -1,646        | -4,074 to 0,7819          | No         | ns        | 0,7745        |
| A. naeslundii:TNZT - HFAG vs. P. gingivalis:TNZT - CaP          | -1,131        | -3,559 to 1,297           | No         | ns        | 0,9987        |
| A. naeslundii:TNZT - HFAG vs. P. gingivalis:TNZT - CaPAg        | -1,881        | -4,309 to 0,5469          | No         | ns        | 0,4737        |
| A. naeslundii:TNZT - HFAG vs. P. gingivalis:TNZT - HF           | -1,206        | -3,634 to 1,222           | No         | ns        | 0,9957        |
| A. naeslundii:TNZT - HFAG vs. P. gingivalis:TNZT - HFAG         | -1,409        | -3,931 to 1,114           | No         | ns        | 0,9734        |
| P. gingivalis:TAV - Control vs. P. gingivalis:TAV - CaP         | -1,155        | -3,326 to 1,016           | No         | ns        | 0,9869        |
| P. gingivalis:TAV - Control vs. P. gingivalis:TAV - CaPAg       | -1,263        | -3,435 to 0,9081          | No         | ns        | 0,9539        |
| P. gingivalis:TAV - Control vs. P. gingivalis:TAV - HF          | -0,4350       | -2,606 to 1,736           | No         | ns        | >0,9999       |
| P. gingivalis:TAV - Control vs. P. gingivalis:TAV - HFAG        | -0,9447       | -3,222 to 1,333           | No         | ns        | 0,9999        |
| P. gingivalis:TAV - Control vs. P. gingivalis:TNZT - Control    | -1,160        | -3,331 to 1,011           | No         | ns        | 0,9860        |
| P. gingivalis:TAV - Control vs. P. gingivalis:TNZT - CaP        | -0,6450       | -2,816 to 1,526           | No         | ns        | >0,9999       |
| P. gingivalis:TAV - Control vs. P. gingivalis:TNZT - CaPAg      | -1,395        | -3,566 to 0,7764          | No         | ns        | 0,8604        |
| P. gingivalis:TAV - Control vs. P. gingivalis:TNZT - HF         | -0,7200       | -2,891 to 1,451           | No         | ns        | >0,9999       |
| P. gingivalis:TAV - Control vs. P. gingivalis:TNZT - HFAG       | -0,9227       | -3,200 to 1,355           | No         | ns        | >0,9999       |
| P. gingivalis:TAV - CaP vs. P. gingivalis:TAV - CaPAg           | -0,1083       | -2,280 to 2,063           | No         | ns        | >0,9999       |
| P. gingivalis:TAV - CaP vs. P. gingivalis:TAV - HF              | 0,7200        | -1,451 to 2,891           | No         | ns        | >0,9999       |
| P. gingivalis:TAV - CaP vs. P. gingivalis:TAV - HFAG            | 0,2103        | -2,067 to 2,488           | No         | ns        | >0,9999       |
| P. gingivalis:TAV - CaP vs. P. gingivalis:TNZT - Control        | -0,005000     | -2,176 to 2,166           | No         | ns        | >0,9999       |
| P. gingivalis:TAV - CaP vs. P. gingivalis:TNZT - CaP            | 0,5100        | -1,661 to 2,681           | No         | ns        | >0,9999       |
| P. gingivalis:TAV - CaP vs. P. gingivalis:TNZT - CaPAg          | -0,2400       | -2,411 to 1,931           | No         | ns        | >0,9999       |
| P. gingivalis:TAV - CaP vs. P. gingivalis:TNZT - HF             | 0,4350        | -1,736 to 2,606           | No         | ns        | >0,9999       |
| P. gingivalis:TAV - CaP vs. P. gingivalis:TNZT - HFAG           | 0,2323        | -2,045 to 2,510           | No         | ns        | >0,9999       |
| P. gingivalis:TAV - CaPAg vs. P. gingivalis:TAV - HF            | 0,8283        | -1,343 to 3,000           | No         | ns        | >0,9999       |
| P. gingivalis:TAV - CaPAg vs. P. gingivalis:TAV - HFAG          | 0,3187        | -1,959 to 2,596           | No         | ns        | >0,9999       |
| P. gingivalis:TAV - CaPAg vs. P. gingivalis:TNZT - Control      | 0,1033        | -2,068 to 2,275           | No         | ns        | >0,9999       |
| P. gingivalis:TAV - CaPAg vs. P. gingivalis:TNZT - CaP          | 0,6183        | -1,553 to 2,790           | No         | ns        | >0,9999       |
| P. gingivalis:TAV - CaPAg vs. P. gingivalis:TNZT - CaPAg        | -0,1317       | -2,303 to 2,040           | No         | ns        | >0,9999       |
| P. gingivalis:TAV - CaPAg vs. P. gingivalis:TNZT - HF           | 0,5433        | -1,628 to 2,715           | No         | ns        | >0,9999       |
| P. gingivalis:TAV - CaPAg vs. P. gingivalis:TNZT - HFAG         | 0,3407        | -1,937 to 2,618           | No         | ns        | >0,9999       |
| P. gingivalis:TAV - HF vs. P. gingivalis:TAV - HFAG             | -0,5097       | -2,787 to 1,768           | No         | ns        | >0,9999       |
| P. gingivalis:TAV - HF vs. P. gingivalis:TNZT - Control         | -0,7250       | -2,896 to 1,446           | No         | ns        | >0,9999       |

|                                                                             |          |                 |    |    |         |
|-----------------------------------------------------------------------------|----------|-----------------|----|----|---------|
| <i>P. gingivalis</i> :TAV - HF vs. <i>P. gingivalis</i> :TNZT - CaP         | -0,2100  | -2,381 to 1,961 | No | ns | >0,9999 |
| <i>P. gingivalis</i> :TAV - HF vs. <i>P. gingivalis</i> :TNZT - CaPAg       | -0,9600  | -3,131 to 1,211 | No | ns | 0,9995  |
| <i>P. gingivalis</i> :TAV - HF vs. <i>P. gingivalis</i> :TNZT - HF          | -0,2850  | -2,456 to 1,886 | No | ns | >0,9999 |
| <i>P. gingivalis</i> :TAV - HF vs. <i>P. gingivalis</i> :TNZT - HFAG        | -0,4877  | -2,765 to 1,790 | No | ns | >0,9999 |
| <i>P. gingivalis</i> :TAV - HFAG vs. <i>P. gingivalis</i> :TNZT - Control   | -0,2153  | -2,493 to 2,062 | No | ns | >0,9999 |
| <i>P. gingivalis</i> :TAV - HFAG vs. <i>P. gingivalis</i> :TNZT - CaP       | 0,2997   | -1,978 to 2,577 | No | ns | >0,9999 |
| <i>P. gingivalis</i> :TAV - HFAG vs. <i>P. gingivalis</i> :TNZT - CaPAg     | -0,4503  | -2,728 to 1,827 | No | ns | >0,9999 |
| <i>P. gingivalis</i> :TAV - HFAG vs. <i>P. gingivalis</i> :TNZT - HF        | 0,2247   | -2,053 to 2,502 | No | ns | >0,9999 |
| <i>P. gingivalis</i> :TAV - HFAG vs. <i>P. gingivalis</i> :TNZT - HFAG      | 0,02200  | -2,357 to 2,401 | No | ns | >0,9999 |
| <i>P. gingivalis</i> :TNZT - Control vs. <i>P. gingivalis</i> :TNZT - CaP   | 0,5150   | -1,656 to 2,686 | No | ns | >0,9999 |
| <i>P. gingivalis</i> :TNZT - Control vs. <i>P. gingivalis</i> :TNZT - CaPAg | -0,2350  | -2,406 to 1,936 | No | ns | >0,9999 |
| <i>P. gingivalis</i> :TNZT - Control vs. <i>P. gingivalis</i> :TNZT - HF    | 0,4400   | -1,731 to 2,611 | No | ns | >0,9999 |
| <i>P. gingivalis</i> :TNZT - Control vs. <i>P. gingivalis</i> :TNZT - HFAG  | 0,2373   | -2,040 to 2,515 | No | ns | >0,9999 |
| <i>P. gingivalis</i> :TNZT - CaP vs. <i>P. gingivalis</i> :TNZT - CaPAg     | -0,7500  | -2,921 to 1,421 | No | ns | >0,9999 |
| <i>P. gingivalis</i> :TNZT - CaP vs. <i>P. gingivalis</i> :TNZT - HF        | -0,07500 | -2,246 to 2,096 | No | ns | >0,9999 |
| <i>P. gingivalis</i> :TNZT - CaP vs. <i>P. gingivalis</i> :TNZT - HFAG      | -0,2777  | -2,555 to 2,000 | No | ns | >0,9999 |
| <i>P. gingivalis</i> :TNZT - CaPAg vs. <i>P. gingivalis</i> :TNZT - HF      | 0,6750   | -1,496 to 2,846 | No | ns | >0,9999 |
| <i>P. gingivalis</i> :TNZT - CaPAg vs. <i>P. gingivalis</i> :TNZT - HFAG    | 0,4723   | -1,805 to 2,750 | No | ns | >0,9999 |
| <i>P. gingivalis</i> :TNZT - HF vs. <i>P. gingivalis</i> :TNZT - HFAG       | -0,2027  | -2,480 to 2,075 | No | ns | >0,9999 |
